# Supplementary material for: Facile synthesis of α-aminophosphine oxides from diarylphosphine oxides, arynes and formamides
Source: Royal Society of Chemistry journal article supplement (doi:10.1039/d1cc04101k), 2021-01-01

# Facile synthesis of $\alpha$ -aminophosphine oxides from diarylphosphine oxides, arynes and formamides

Wen-Bin Huang, Li-Qi Qiu, Fang-Yu Ren, Liang-Nian He\*

State Key Laboratory and Institute of Elemento-Organic Chemistry, College of Chemistry, Nankai University, Tianjin 300071, China

## Table of Contents

|                                                                                                                     |    |
|---------------------------------------------------------------------------------------------------------------------|----|
| 1. General information .....                                                                                        | 2  |
| 2. General experimental procedure .....                                                                             | 2  |
| 3. Optimization of the reaction conditions.....                                                                     | 3  |
| 4. Characterization data of the products .....                                                                      | 3  |
| 5. Gram-scale syntheses and transformations of <b>4aa</b> .....                                                     | 17 |
| 6. Mechanistic study .....                                                                                          | 19 |
| 7. X-ray crystal structure.....                                                                                     | 22 |
| 8. References.....                                                                                                  | 23 |
| 9. $^1\text{H}$ NMR, $^{13}\text{C}$ NMR, $^{31}\text{P}$ NMR and $^{11}\text{B}$ NMR spectra of the products ..... | 23 |

## 1. General information

Unless otherwise noted, all reagents were obtained from commercial suppliers and used without further purification. Diphenylphosphine oxide **1a** was purchased from J&K Chemical Ltd., diarylphosphine oxide **1b-1e**, **1j-1o** were purchased from Energy Chemical or Adamas-beta®, **1f-1i**, **1p**, **1q** were prepared according to the literature procedures.<sup>1</sup> Aryne precursors **2a**, **2c**, **2d**, **2f** and **2g** were prepared according to the literature procedures.<sup>2</sup> Aryne precursors **2b**, **2e** and **2h** were purchased from Shanghai Xian Ding Biotechnology Co., Ltd®. The products were isolated by column chromatography on silica gel (100-200 mesh) using petroleum ether/ethyl acetate or recrystallization with hexane and ethyl acetate. NMR spectra were obtained on a Bruker 400 MHz spectrometer at 20 °C. The <sup>1</sup>H NMR (400 MHz) chemical shifts were measured relative to CDCl<sub>3</sub>, DMSO-*d*<sub>6</sub> and CD<sub>3</sub>CN as the internal reference (CDCl<sub>3</sub>: δ = 7.26 ppm, DMSO-*d*<sub>6</sub>: δ = 2.49 ppm, CD<sub>3</sub>CN: δ = 1.94 ppm). The <sup>13</sup>C NMR (101 MHz) chemical shifts were given using CDCl<sub>3</sub>, DMSO-*d*<sub>6</sub> and CD<sub>3</sub>CN as the internal standard (CDCl<sub>3</sub>: δ = 77.16 ppm, DMSO-*d*<sub>6</sub>: δ = 39.52 ppm, CD<sub>3</sub>CN: δ = 1.32, 118.29 ppm). The <sup>31</sup>P NMR (162 MHz) data were recorded with a Bruker 400 MHz spectrometer. FT-IR was recorded on a Bruker Tensor 27 FT-IR spectrophotometer with KBr pellets. High-resolution mass spectra (HR-MS) were obtained with a Waters-Q-TOF-Premier (ESI<sup>+</sup> or ESI<sup>-</sup>).

## 2. General experimental procedure

### General procedure for the synthesis of $\alpha$ -amino phosphine oxide compounds.

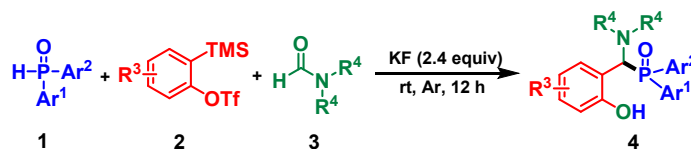

To a 10 mL Schlenk tube equipped with a magnetic stir bar was charged with diarylphosphine oxide **1** (0.25 mmol), KF (34.9 mg, 0.6 mmol) and formamide (1 mL) in a glove box. The aryne precursor **2** (0.3 mmol) was added to the reaction mixture, then stirred at room temperature for 12 h. After the reaction, formamide **3** was distilled under reduced pressure. The reaction mixture was concentrated and purified by silica gel column chromatography (silica: 100-200 mesh, petroleum ether/ethyl acetate, from 3:1 to 1:2) to afford the corresponding  $\alpha$ -amino phosphine oxide products **4**.

### 3. Optimization of the reaction conditions

Table S1 Optimization of reaction conditions<sup>a</sup>

| Entry           | 2a (equiv) | 3a        | promoter (equiv)                      | additive (equiv)                                    | T (°C) | Yield <sup>b</sup> /% |
|-----------------|------------|-----------|---------------------------------------|-----------------------------------------------------|--------|-----------------------|
| 1               | 2.0        | 1 mL      | KF (4.0)                              | 18-Crown-6 (2.4 equiv)                              | 25     | 96                    |
| 2               | 2.0        | 1 mL      | CsF (4.0)                             | 18-Crown-6 (2.4 equiv)                              | 25     | 67                    |
| 3               | 2.0        | 1 mL      | TBAF (4.0)                            | 18-Crown-6 (2.4 equiv)                              | 25     | 62                    |
| 4               | 1.2        | 1 mL      | KF (2.4)                              | 18-Crown-6 (2.4 equiv)                              | 25     | 94                    |
| 5               | 1.2        | 1 mL      | KF (2.4)                              | -                                                   | 25     | 95 (91) <sup>c</sup>  |
| 6               | 1.2        | 1 mL      | LiF (2.4)                             | -                                                   | 25     | n.d.                  |
| 7               | 1.2        | 1 mL      | NaF (2.4)                             | -                                                   | 25     | n.d.                  |
| 8               | 1.2        | 1 mL      | Na <sub>2</sub> CO <sub>3</sub> (2.4) | -                                                   | 25     | <10                   |
| 9               | 1.2        | 1 mL      | K <sub>2</sub> CO <sub>3</sub> (2.4)  | -                                                   | 25     | 68                    |
| 10              | 1.2        | 1 mL      | Cs <sub>2</sub> CO <sub>3</sub> (2.4) | -                                                   | 25     | 44                    |
| 11              | 1.2        | 1 mL      | KF (2.4)                              | -                                                   | 0      | trace                 |
| 12              | 1.2        | 1 mL      | KF (2.4)                              | -                                                   | 15     | 71                    |
| 13              | 1.2        | 1 mL      | KF (2.4)                              | -                                                   | 40     | 87                    |
| 14              | 1.2        | 1 mL      | KF (1.2)                              | -                                                   | 25     | 89                    |
| 15              | 1.2        | 0.5 mL    | KF (2.4)                              | -                                                   | 25     | 87                    |
| 16              | 1.2        | 2.0 mL    | KF (2.4)                              | -                                                   | 25     | 92                    |
| 17 <sup>d</sup> | 1.2        | 3.0 equiv | KF (2.4)                              | -                                                   | 25     | n.d.                  |
| 18 <sup>e</sup> | 1.2        | 10 equiv  | KF (2.4)                              | -                                                   | 25     | <10                   |
| 19 <sup>f</sup> | 1.2        | 0.5 mL    | KF (2.4)                              | -                                                   | 25     | 65                    |
| 20 <sup>g</sup> | 1.2        | 0.5 mL    | KF (2.4)                              | -                                                   | 25     | 56                    |
| 21 <sup>h</sup> | 1.2        | 0.5 mL    | KF (2.4)                              | -                                                   | 25     | 53                    |
| 22 <sup>i</sup> | 1.2        | 0.5 mL    | KF (2.4)                              | -                                                   | 25     | 22                    |
| 23              | 1.2        | 1 mL      | KF (2.4)                              | 4A molecular sieve (25 mol%)                        | 25     | trace                 |
| 24              | 1.2        | 1 mL      | KF (2.4)                              | anhydrous Na <sub>2</sub> SO <sub>4</sub> (50 mol%) | 25     | 87                    |
| 25              | 1.2        | 1 mL      | -                                     | -                                                   | 25     | n.d.                  |

<sup>a</sup> Unless otherwise specified notes, the reactions were performed with **1a** (0.25 mmol, 1.0 equiv), fluoride source (specified equiv), additive (0.6 mmol, 2.4 equiv), DMF (1 mL), rt, 12 h. <sup>b</sup> Determined by <sup>1</sup>H NMR using 1,3,5-trimethoxybenzene as an internal standard. <sup>c</sup> Isolated yield was given in parenthesis. <sup>d</sup> 1 mL CH<sub>3</sub>CN was used as solvent. <sup>e</sup> 1 mL THF was used as solvent. <sup>f</sup> 0.5 mL THF was used as co-solvent. <sup>g</sup> 0.5 mL CH<sub>3</sub>CN was used as co-solvent. <sup>h</sup> 0.5 mL 1,4-dioxane was used as co-solvent. <sup>i</sup> 0.5 mL chlorobenzene was used as co-solvent. n.d. = not detected.

### 4. Characterization data of the products

#### ((dimethylamino)(2-hydroxyphenyl)methyl)diphenylphosphine oxide (**4aa**).

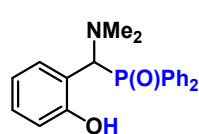

Purification via silica gel column chromatography (petroleum ether/ethyl acetate = 1/2, v/v)

White solid, m. p.: 156-157 °C.

79.8 mg, 91% yield.

<sup>1</sup>H NMR (400 MHz, DMSO-*d*<sub>6</sub>) δ 9.83 (s, 1H), 7.92 (d, *J* = 8.3 Hz, 2H), 7.71 (d, *J* = 7.3 Hz, 1H), 7.66-7.57 (m, 2H), 7.53 (s, 3H), 7.38-7.23 (m, 3H), 7.02 (t, *J* = 7.3 Hz, 1H), 6.78 (d, *J* = 8.0 Hz, 1H), 6.69 (t, *J* = 7.1 Hz, 1H), 5.27 (d, *J* = 11.6 Hz, 1H), 2.25 (s, 6H). <sup>13</sup>C NMR (101

MHz, DMSO- $d_6$ )  $\delta$  156.4 (d,  $J$  = 8.5 Hz), 134.0 (d,  $J$  = 98.0 Hz), 133.3 (d,  $J$  = 92.9 Hz), 132.4 (d,  $J$  = 4.6 Hz), 131.2 (dd,  $J$  = 5.1, 1.6 Hz), 130.8 (d,  $J$  = 8.6 Hz), 130.1 (d,  $J$  = 8.3 Hz), 128.9, 128.5 (d,  $J$  = 11.1 Hz), 128.2 (d,  $J$  = 10.9 Hz), 118.0, 116.8 (d,  $J$  = 4.4 Hz), 115.4, 58.1 (d,  $J$  = 90.7 Hz), 43.5 (d,  $J$  = 7.7 Hz).  $^{31}\text{P}$  NMR (162 MHz, DMSO- $d_6$ )  $\delta$  31.49. IR (KBr): 3692, 3652, 3631, 3057, 2988, 2947, 2868, 2829, 2784, 1601, 1454, 1438, 1384, 1265, 1150, 1117, 1026, 737, 700, 557, 527  $\text{cm}^{-1}$ . HR-ESI-MS: calculated  $m/z$   $[\text{M}+\text{H}]^+$  for  $[\text{C}_{21}\text{H}_{23}\text{NO}_2\text{P}]^+$ : 352.1466, found: 352.1462.

**((dimethylamino)(2-hydroxyphenyl)methyl)di-*p*-tolylphosphine oxide (4ba)**

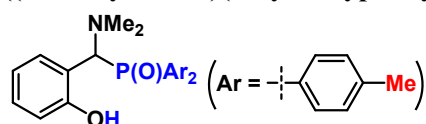

Purification via silica gel column chromatography (petroleum ether/ethyl acetate = 1/2, v/v)  
Pale yellow solid, m. p.: 97-98 °C.

88.2 mg, 93% yield.

$^1\text{H}$  NMR (400 MHz,  $\text{CDCl}_3$ )  $\delta$  10.59 (s, 1H), 7.81 (dd,  $J$  = 10.1, 8.5 Hz, 2H), 7.42 (dd,  $J$  = 10.1, 8.6 Hz, 2H), 7.31 (d,  $J$  = 6.8 Hz, 2H), 7.11-6.97 (m, 3H), 6.90 (d,  $J$  = 8.1 Hz, 1H), 6.78 (d,  $J$  = 7.5 Hz, 1H), 6.54 (t,  $J$  = 7.3 Hz, 1H), 4.40 (d,  $J$  = 9.3 Hz, 1H), 2.40 (s, 3H), 2.39 (s, 6H), 2.22 (s, 3H).  $^{13}\text{C}$  NMR (101 MHz,  $\text{CDCl}_3$ )  $\delta$  157.5 (d,  $J$  = 4.8 Hz), 142.1 (dd,  $J$  = 35.8, 2.8 Hz), 133.1 (d,  $J$  = 7.8 Hz), 131.3 (d,  $J$  = 8.9 Hz), 130.9 (d,  $J$  = 9.1 Hz), 129.5, 129.4 (d,  $J$  = 11.1 Hz), 129.0 (d,  $J$  = 12.0 Hz), 128.9 (d,  $J$  = 102.0 Hz), 128.3 (d,  $J$  = 100.0 Hz), 118.7, 117.8, 117.4, 69.1 (d,  $J$  = 83.4 Hz), 44.6 (d,  $J$  = 7.1 Hz), 21.6 (d,  $J$  = 18.0 Hz).  $^{31}\text{P}$  NMR (162 MHz,  $\text{CDCl}_3$ )  $\delta$  35.01. IR (KBr): 3062, 2940, 2867, 2830, 2785, 2733, 2617, 1914, 1738, 1602, 1501, 1454, 1397, 1379, 1346, 1275, 1240, 1150, 1116, 1099, 1023, 848, 806, 758, 738, 712, 659, 617, 550, 520, 453  $\text{cm}^{-1}$ . HR-ESI-MS: calculated  $m/z$   $[\text{M}+\text{H}]^+$  for  $[\text{C}_{23}\text{H}_{27}\text{NO}_2\text{P}]^+$ : 380.1779, found: 380.1777.

**bis(4-(*tert*-butyl)phenyl)((dimethylamino)(2-hydroxyphenyl)methyl)phosphine oxide (4ca)**

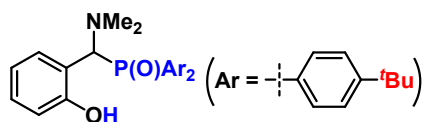

Purification via silica gel column chromatography (petroleum ether/ethyl acetate = 1/2, v/v)  
White solid, m. p.: 191-192 °C.

107.7 mg, 93% yield.

$^1\text{H}$  NMR (400 MHz,  $\text{CDCl}_3$ )  $\delta$  10.69 (s, 1H), 7.92-7.78 (m, 2H), 7.59-7.37 (m, 4H), 7.22 (d,  $J$  = 6.3 Hz, 2H), 7.03 (t,  $J$  = 7.5 Hz, 1H), 6.89 (d,  $J$  = 8.0 Hz, 1H), 6.71 (d,  $J$  = 7.4 Hz, 1H), 6.48 (t,  $J$  = 7.3 Hz, 1H), 4.38 (d,  $J$  = 8.9 Hz, 1H), 2.39 (s, 6H), 1.33 (s, 9H), 1.19 (s, 9H).  $^{13}\text{C}$  NMR (101 MHz,  $\text{CDCl}_3$ )  $\delta$  157.5 (d,  $J$  = 4.4 Hz), 155.1 (dd,  $J$  = 31.4, 2.5 Hz), 133.0 (d,  $J$  = 7.9 Hz), 131.2 (d,  $J$  = 8.9 Hz), 130.8 (d,  $J$  = 9.1 Hz), 129.4, 128.4, 128.3 (d,  $J$  = 101.0 Hz), 125.59 (d,  $J$  = 11.8 Hz), 125.24 (d,  $J$  = 11.8 Hz), 118.59, 117.70 (d,  $J$  = 20.1 Hz), 69.93 (d,  $J$  = 82.0 Hz), 44.75 (d,  $J$  = 7.2 Hz), 34.95 (d,  $J$  = 20.3 Hz), 31.13 (d,  $J$  = 15.6 Hz).  $^{31}\text{P}$  NMR (162 MHz,  $\text{CDCl}_3$ )  $\delta$  34.53. IR (KBr): 3064, 2965, 2907, 2869, 2830, 2785, 2735, 1919, 1600, 1455, 1393, 1268, 1170, 1115, 1093, 1024, 828, 757, 745, 613, 593, 566, 515  $\text{cm}^{-1}$ . HR-ESI-MS: calculated  $m/z$   $[\text{M}+\text{H}]^+$  for  $[\text{C}_{29}\text{H}_{39}\text{NO}_2\text{P}]^+$ : 464.2718, found: 464.2708.

**((dimethylamino)(2-hydroxyphenyl)methyl)bis(4-methoxyphenyl)phosphine oxide (4da)**

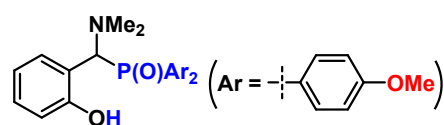

Purification via silica gel column chromatography (petroleum ether/ethyl acetate = 1/2, v/v)  
White solid, m. p.: 94-95 °C.

92.5 mg, 90% yield;

**<sup>1</sup>H NMR** (400 MHz, CDCl<sub>3</sub>) δ 10.65 (s, 1H), 7.83 (dd, *J* = 10.3, 8.8 Hz, 2H), 7.43 (dd, *J* = 10.3, 8.9 Hz, 2H), 7.05 (t, *J* = 7.6 Hz, 1H), 6.99 (dd, *J* = 8.7, 2.0 Hz, 2H), 6.89 (d, *J* = 8.0 Hz, 1H), 6.79 (d, *J* = 7.4 Hz, 1H), 6.71 (dd, *J* = 8.7, 2.0 Hz, 2H), 6.55 (t, *J* = 7.3 Hz, 1H), 4.36 (d, *J* = 9.7 Hz, 1H), 3.82 (s, 3H), 3.67 (s, 3H), 2.38 (s, 6H). **<sup>13</sup>C NMR** (101 MHz, CDCl<sub>3</sub>) δ 162.4 (dd, *J* = 29.9, 2.7 Hz), 157.6 (d, *J* = 4.1 Hz), 133.3 (d, *J* = 10.1 Hz), 133.2 (d, *J* = 8.1 Hz), 132.9 (d, *J* = 10.1 Hz), 129.6, 123.1 (d, *J* = 105.5 Hz), 122.7 (d, *J* = 104.6 Hz), 118.8, 118.2, 117.5, 114.2 (d, *J* = 12.6 Hz), 113.9 (d, *J* = 12.6 Hz), 70.9 (d, *J* = 82.9 Hz), 55.4 (d, *J* = 15.7 Hz), 44.7 (d, *J* = 7.2 Hz). **<sup>31</sup>P NMR** (162 MHz, CDCl<sub>3</sub>) δ 34.77. **IR** (KBr): 3286, 2955, 2920, 2850, 1736, 1646, 1597, 1502, 1458, 1376, 1256, 1119, 1082, 1026, 800, 765, 556, 515, 448 cm<sup>-1</sup>. **HR-ESI-MS**: calculated *m/z* [M+Na]<sup>+</sup> for [C<sub>23</sub>H<sub>26</sub>NO<sub>4</sub>PNa]<sup>+</sup>: 434.1497, found: 434.1492.

**di([1,1'-biphenyl]-4-yl)((dimethylamino)(2-hydroxyphenyl)methyl)phosphine oxide (4ea)**

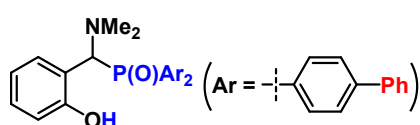

Purification via silica gel column chromatography (petroleum ether/ethyl acetate = 1/1, v/v)

White solid, m. p.: 126-127 °C.

120.7 mg, 96% yield;

**<sup>1</sup>H NMR** (400 MHz, CDCl<sub>3</sub>) δ 10.61 (s, 1H), 8.07 (dd, *J* = 10.6, 8.3 Hz, 2H), 7.76 (dd, *J* = 8.2, 2.5 Hz, 2H), 7.71-7.61 (m, 4H), 7.48 (dd, *J* = 8.8, 6.0 Hz, 6H), 7.43-7.30 (m, 4H), 7.10 (t, *J* = 7.7 Hz, 1H), 6.97 (d, *J* = 7.9 Hz, 1H), 6.86 (d, *J* = 7.5 Hz, 1H), 6.57 (t, *J* = 7.4 Hz, 1H), 4.55 (d, *J* = 8.8 Hz, 1H), 2.47 (s, 6H). **<sup>13</sup>C NMR** (101 MHz, CDCl<sub>3</sub>) δ 157.5 (d, *J* = 4.7 Hz), 144.5 (dd, *J* = 41.0, 2.5 Hz), 139.8 (d, *J* = 9.3 Hz), 133.0 (d, *J* = 7.6 Hz), 131.9 (d, *J* = 8.8 Hz), 131.5 (d, *J* = 9.1 Hz), 130.7 (d, *J* = 99.5 Hz), 130.1 (d, *J* = 99.2 Hz), 129.8, 129.0 (d, *J* = 14.6 Hz), 128.2 (d, *J* = 16.0 Hz), 127.4 (d, *J* = 11.7 Hz), 127.3 (d, *J* = 13.3 Hz), 127.0 (d, *J* = 11.8 Hz), 118.9, 117.9, 117.3, 69.2 (d, *J* = 82.6 Hz), 44.8 (d, *J* = 7.3 Hz). **<sup>31</sup>P NMR** (162 MHz, CDCl<sub>3</sub>) δ 34.28. **IR** (KBr): 3703, 3678, 3659, 3631, 3059, 3030, 2941, 2868, 2830, 2785, 1599, 1484, 1454, 1393, 1265, 1169, 1150, 1121, 1007, 834, 758, 697, 670, 660, 570, 525 cm<sup>-1</sup>. **HR-ESI-MS**: calculated *m/z* [M+H]<sup>+</sup> for [C<sub>33</sub>H<sub>31</sub>NO<sub>2</sub>P]<sup>+</sup>: 504.2092, found: 504.2089.

**((dimethylamino)(2-hydroxyphenyl)methyl)bis(4-fluorophenyl)phosphine oxide (4fa)**

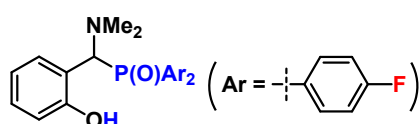

Purification via silica gel column chromatography (petroleum ether/ethyl acetate = 2/1, v/v)

White solid, m. p.: 171-172 °C.

90.0 mg, 93% yield.

**<sup>1</sup>H NMR** (400 MHz, CDCl<sub>3</sub>) δ 10.41 (s, 1H), 7.91 (ddd, *J* = 10.2, 8.8, 5.9 Hz, 2H), 7.50 (ddd, *J* = 10.4, 8.8, 5.8 Hz, 2H), 7.25-7.18 (m, 2H), 7.09 (t, *J* = 7.7 Hz, 1H), 6.99-6.90 (m, 2H), 6.88 (d, *J* = 8.1 Hz, 1H), 6.63 (d, *J* = 7.4 Hz, 1H), 6.54 (t, *J* = 7.3 Hz, 1H), 4.28 (d, *J* = 8.8 Hz, 1H), 2.39 (s, 6H). **<sup>13</sup>C NMR** (101 MHz, CDCl<sub>3</sub>) δ 166.4 (dd, *J* = 29.8, 3.3 Hz), 163.9 (dd, *J* = 29.5, 3.4 Hz), 157.4 (d, *J* = 4.6 Hz), 134.0 (d, *J* = 18.7 Hz), 133.8 (d, *J* = 37.3 Hz), 133.6 (d, *J* = 19.2 Hz), 132.9 (d, *J* = 8.1 Hz), 130.0, 127.7 (dd, *J* = 101.4, 3.4 Hz), 127.1 (d, *J* = 101.1 Hz), 119.1, 118.1, 117.0, 116.4, 116.2 (d, *J* = 8.7 Hz), 116.1 (d, *J* = 1.5 Hz), 115.9 (d, *J* = 8.7 Hz), 115.7, 70.5 (d, *J* = 83.5 Hz), 44.8 (d, *J* = 7.2 Hz). **<sup>31</sup>P NMR** (162 MHz, CDCl<sub>3</sub>) δ 33.00. **IR** (KBr): 3069, 2949, 2927, 2869, 2832, 2788, 1592, 1500, 1455, 1265, 1236, 1161, 1116, 1026, 829, 748, 549, 457 cm<sup>-1</sup>. **HR-ESI-MS**: calculated *m/z* [M+H]<sup>+</sup> for [C<sub>21</sub>H<sub>21</sub>F<sub>2</sub>NO<sub>2</sub>P]<sup>+</sup>: 388.1278, found: 388.1276.

**bis(4-bromophenyl)((dimethylamino)(2-hydroxyphenyl)methyl)phosphine oxide (4ga)**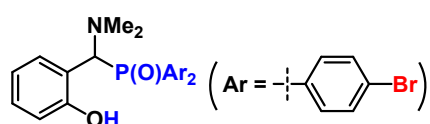

Purification via silica gel column chromatography  
(petroleum ether/ethyl acetate = 2/1, v/v)  
White solid, m. p.: 178-179 °C.

115.3 mg, 91% yield.

$^1\text{H NMR}$  (400 MHz,  $\text{CDCl}_3$ )  $\delta$  10.14 (s, 1H), 7.83-7.71 (m, 2H), 7.66 (d,  $J = 6.4$  Hz, 2H), 7.41-7.34 (m, 4H), 7.09 (t,  $J = 7.6$  Hz, 1H), 6.89 (d,  $J = 8.1$  Hz, 1H), 6.77 (d,  $J = 7.5$  Hz, 1H), 6.58 (t,  $J = 7.4$  Hz, 1H), 4.38 (d,  $J = 8.8$  Hz, 1H), 2.39 (s, 6H).  $^{13}\text{C NMR}$  (101 MHz,  $\text{CDCl}_3$ )  $\delta$  157.2 (d,  $J = 5.1$  Hz), 132.9 (d,  $J = 9.3$  Hz), 132.7 (d,  $J = 7.3$  Hz), 132.5 (d,  $J = 9.5$  Hz), 132.1 (d,  $J = 12.0$  Hz), 131.8 (d,  $J = 12.0$  Hz), 130.9 (d,  $J = 98.9$  Hz), 130.2 (d,  $J = 98.5$  Hz), 130.0, 127.5 (d,  $J = 3.2$  Hz), 127.2 (d,  $J = 3.4$  Hz), 119.2, 117.7, 116.8, 68.3 (d,  $J = 83.8$  Hz), 44.7 (d,  $J = 7.4$  Hz).  $^{31}\text{P NMR}$  (162 MHz,  $\text{CDCl}_3$ )  $\delta$  33.25. **IR** (KBr): 2955, 2925, 2867, 2786, 1577, 1478, 1455, 1384, 1275, 1262, 1171, 1152, 1116, 1096, 1069, 1010, 812, 744, 706, 564, 531  $\text{cm}^{-1}$ . **HR-ESI-MS**: calculated  $m/z$   $[\text{M}+\text{Na}]^+$  for  $[\text{C}_{21}\text{H}_{20}\text{Br}_2\text{NO}_2\text{PNa}]^+$ : 529.9496, found: 529.9494.

**((dimethylamino)(2-hydroxyphenyl)methyl)bis(4-(trifluoromethyl)phenyl)phosphine oxide (4ha)**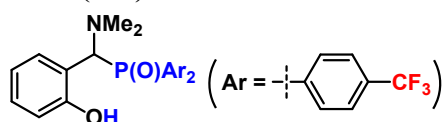

Compound **4ha** is easily decomposed during the isolation process.  
 $^1\text{H NMR}$  yield = 51%.

Characteristic peaks of the crude reaction mixture:  $^1\text{H NMR}$  (400 MHz,  $\text{CDCl}_3$ )  $\delta$  10.39 (s, 1H), 6.63 (t,  $J = 6.4$  Hz, 1H), 4.97 (d,  $J = 8.9$  Hz, 1H), 2.38 (s, 6H).  $^{13}\text{C NMR}$  (101 MHz,  $\text{CDCl}_3$ )  $\delta$  156.9 (d,  $J = 7.0$  Hz), 64.2 (d,  $J = 85.4$  Hz), 44.4 (d,  $J = 7.8$  Hz).  $^{31}\text{P NMR}$  (162 MHz,  $\text{CDCl}_3$ )  $\delta$  31.09. **HR-ESI-MS**: calculated  $m/z$   $[\text{M}+\text{Na}]^+$  for  $[\text{C}_{23}\text{H}_{20}\text{F}_6\text{NO}_2\text{PNa}]^+$ : 510.1034, found: 510.1033.

**bis(3-chlorophenyl)((dimethylamino)(2-hydroxyphenyl)methyl)phosphine oxide (4ia)**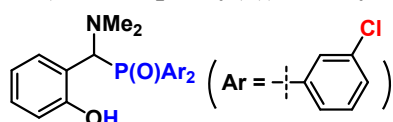

Recrystallization with hexane and ethyl acetate  
White solid, m. p.: 177-178 °C.

$^1\text{H NMR}$  yield = 76%.

48.2 mg, recrystallization yield = 46%.

$^1\text{H NMR}$  (400 MHz,  $\text{DMSO}-d_6$ )  $\delta$  9.81 (s, 1H), 7.95 (d,  $J = 10.9$  Hz, 1H), 7.92-7.85 (m, 1H), 7.69 (d,  $J = 7.5$  Hz, 1H), 7.58 (ddd,  $J = 12.2, 11.2, 5.8$  Hz, 4H), 7.44 (d,  $J = 7.8$  Hz, 1H), 7.35 (td,  $J = 7.7, 2.9$  Hz, 1H), 7.05 (t,  $J = 7.5$  Hz, 1H), 6.80 (d,  $J = 8.1$  Hz, 1H), 6.71 (t,  $J = 7.4$  Hz, 1H), 5.31 (d,  $J = 11.8$  Hz, 1H), 2.25 (s, 6H).  $^{13}\text{C NMR}$  (101 MHz,  $\text{DMSO}-d_6$ )  $\delta$  156.4 (d,  $J = 9.1$  Hz), 136.0 (d,  $J = 96.1$  Hz), 135.3 (d,  $J = 90.4$  Hz), 133.6 (d,  $J = 14.5$  Hz), 133.4 (d,  $J = 14.2$  Hz), 132.2 (d,  $J = 4.3$  Hz), 131.5, 130.7 (d,  $J = 12.1$  Hz), 130.5 (d,  $J = 11.7$  Hz), 130.3 (d,  $J = 9.2$  Hz), 129.6 (d,  $J = 9.4$  Hz), 129.4 (d,  $J = 8.4$  Hz), 129.3, 128.7 (d,  $J = 8.1$  Hz), 118.1, 116.1 (d,  $J = 4.7$  Hz), 115.3, 57.6 (d,  $J = 92.3$  Hz), 43.4 (d,  $J = 8.1$  Hz).  $^{31}\text{P NMR}$  (162 MHz,  $\text{DMSO}-d_6$ )  $\delta$  29.61. **IR** (KBr): 3197, 3147, 3069, 2947, 2878, 2829, 2735, 2619, 1601, 1564, 1454, 1403, 1347, 1271, 1238, 1172, 1152, 1133, 1073, 1028, 848, 757, 678, 572, 550, 509, 459  $\text{cm}^{-1}$ . **HR-ESI-MS**: calculated  $m/z$   $[\text{M}+\text{Na}]^+$  for  $[\text{C}_{21}\text{H}_{20}\text{Cl}_2\text{NO}_2\text{PNa}]^+$ : 442.0506, found: 442.0497.

**((dimethylamino)(2-hydroxyphenyl)methyl)bis(3,5-dimethylphenyl)phosphine oxide (4ja)**

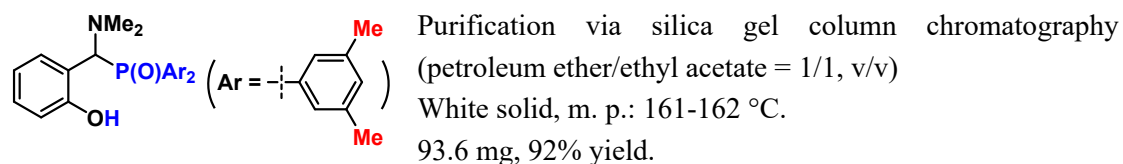

<sup>1</sup>H NMR (400 MHz, DMSO-*d*<sub>6</sub>) δ 9.87 (s, 1H), 7.68 (d, *J* = 7.5 Hz, 1H), 7.48 (d, *J* = 11.0 Hz, 2H), 7.23 (d, *J* = 10.7 Hz, 2H), 7.16 (s, 1H), 7.04 (t, *J* = 7.6 Hz, 1H), 6.97 (s, 1H), 6.81 (d, *J* = 8.1 Hz, 1H), 6.71 (t, *J* = 7.4 Hz, 1H), 5.22 (d, *J* = 11.8 Hz, 1H), 2.34 (s, 6H), 2.23 (s, 6H), 2.17 (s, 6H). <sup>13</sup>C NMR (101 MHz, DMSO-*d*<sub>6</sub>) δ 156.5 (d, *J* = 8.1 Hz), 137.4 (d, *J* = 27.7 Hz), 137.3 (d, *J* = 27.3 Hz), 134.0 (d, *J* = 97.3 Hz), 133.3 (d, *J* = 92.5 Hz), 132.5 (t, *J* = 5.0 Hz), 128.8, 128.1 (d, *J* = 8.5 Hz), 127.6 (d, *J* = 8.4 Hz), 117.9, 117.0 (d, *J* = 4.5 Hz), 115.3, 58.0 (d, *J* = 90.5 Hz), 43.4 (d, *J* = 7.7 Hz), 20.8 (d, *J* = 19.6 Hz). <sup>31</sup>P NMR (162 MHz, CDCl<sub>3</sub>) δ 36.91. IR (KBr): 3055, 2940, 2862, 2784, 2307, 1738, 1602, 1455, 1266, 1151, 1125, 1030, 850, 750, 694, 579, 435 cm<sup>-1</sup>. HR-ESI-MS: calculated *m/z* [M+H]<sup>+</sup> for [C<sub>25</sub>H<sub>31</sub>NO<sub>2</sub>P]<sup>+</sup>: 408.2092, found: 408.2082.

**bis(3,5-di-*tert*-butylphenyl)((dimethylamino)(2-hydroxyphenyl)methyl)phosphine oxide (4ka)**

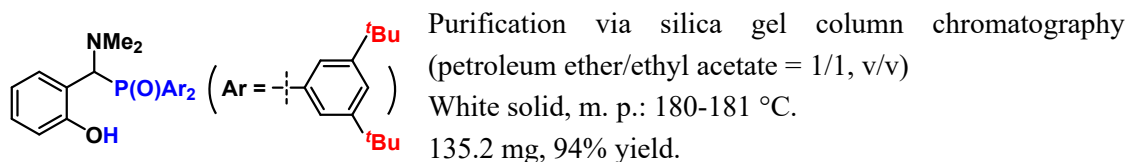

<sup>1</sup>H NMR (400 MHz, CDCl<sub>3</sub>) δ 10.76 (s, 1H), 7.77 (dd, *J* = 11.7, 1.7 Hz, 2H), 7.61 (s, 1H), 7.42-7.35 (m, 3H), 7.02 (t, *J* = 7.6 Hz, 1H), 6.89 (d, *J* = 7.9 Hz, 1H), 6.50 (d, *J* = 7.4 Hz, 1H), 6.44 (t, *J* = 7.3 Hz, 1H), 4.17 (d, *J* = 9.3 Hz, 1H), 2.39 (s, 6H), 1.35 (s, 18H), 1.18 (s, 18H). <sup>13</sup>C NMR (101 MHz, CDCl<sub>3</sub>) δ 157.7 (d, *J* = 3.7 Hz), 150.9 (d, *J* = 11.3 Hz), 150.6 (d, *J* = 11.3 Hz), 132.9 (d, *J* = 7.7 Hz), 130.8 (d, *J* = 97.5 Hz), 130.4 (d, *J* = 96.9 Hz), 129.4, 126.0 (d, *J* = 2.1 Hz), 125.8 (d, *J* = 8.8 Hz), 125.8 (overlapped), 125.5 (d, *J* = 9.3 Hz), 118.5, 118.1 (d, *J* = 2.3 Hz), 73.6-70.1 (m), 44.96 (d, *J* = 7.2 Hz), 35.1 (d, *J* = 21.6 Hz), 31.4 (d, *J* = 22.2 Hz). <sup>31</sup>P NMR (162 MHz, CDCl<sub>3</sub>) δ 35.34. IR (KBr): 3066, 2964, 2905, 2869, 2830, 2785, 1593, 1477, 1455, 1424, 1363, 1249, 1169, 1149, 1127, 1026, 871, 754, 707, 603, 496 cm<sup>-1</sup>. HR-ESI-MS: calculated *m/z* [M+H]<sup>+</sup> for [C<sub>37</sub>H<sub>55</sub>NO<sub>2</sub>P]<sup>+</sup>: 576.3970, found: 576.3966.

**((dimethylamino)(2-hydroxyphenyl)methyl)di(naphthalen-2-yl)phosphine oxide (4la)**

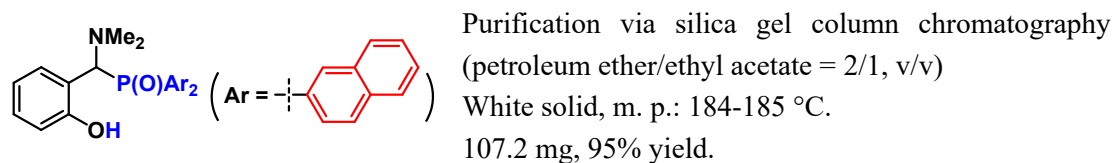

<sup>1</sup>H NMR (400 MHz, CDCl<sub>3</sub>) δ 10.69 (s, 1H), 8.64 (d, *J* = 13.1 Hz, 1H), 8.24 (d, *J* = 13.1 Hz, 1H), 7.97 (d, *J* = 5.6 Hz, 2H), 7.90 (t, *J* = 8.9 Hz, 2H), 7.71-7.50 (m, 6H), 7.44 (t, *J* = 7.1 Hz, 1H), 7.37 (t, *J* = 7.1 Hz, 1H), 7.06-6.96 (m, 2H), 6.93 (d, *J* = 7.5 Hz, 1H), 6.50 (t, *J* = 7.0 Hz, 1H), 4.77 (d, *J* = 8.9 Hz, 1H), 2.47 (s, 6H). <sup>13</sup>C NMR (101 MHz, CDCl<sub>3</sub>) δ 157.5 (d, *J* = 5.2 Hz), 134.6 (dd, *J* = 30.7, 1.9 Hz), 133.5 (d, *J* = 7.8 Hz), 133.2 (d, *J* = 8.1 Hz), 133.0 (d, *J* = 7.4 Hz), 132.7 (d, *J* = 12.7 Hz), 132.3 (d, *J* = 12.6 Hz), 129.7, 129.6 (d, *J* = 98.7 Hz), 129.0 (d, *J* = 11.7 Hz), 128.8 (d, *J* = 97.9 Hz), 128.3 (d, *J* = 23.7 Hz), 127.7 (d, *J* = 26.4 Hz), 126.8 (d, *J* = 35.2 Hz), 126.2 (d, *J* = 9.8 Hz), 125.6 (d, *J* = 9.8 Hz), 118.9, 117.7, 117.4, 68.0 (d, *J* =

83.7 Hz), 44.7 (d,  $J = 7.4$  Hz).  $^{31}\text{P}$  NMR (162 MHz,  $\text{CDCl}_3$ )  $\delta$  34.67. IR (KBr): 3056, 2940, 2868, 2830, 2785, 2732, 2611, 1601, 1591, 1501, 1454, 1382, 1341, 1271, 1240, 1162, 1150, 1132, 1089, 1043, 1021, 858, 815, 742, 655, 598, 532, 477  $\text{cm}^{-1}$ . HR-ESI-MS: calculated  $m/z$   $[\text{M}+\text{H}]^+$  for  $[\text{C}_{29}\text{H}_{27}\text{NO}_2\text{P}]^+$ : 452.1779, found: 452.1770.

**((dimethylamino)(2-hydroxyphenyl)methyl)di(naphthalen-1-yl)phosphine oxide (4ma)**

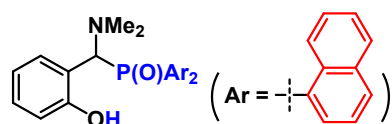

Purification via silica gel column chromatography (petroleum ether/ethyl acetate = 2/1, v/v)

White solid, m. p.: 176-178 °C.

79.0 mg, 70% yield.

$^1\text{H}$  NMR (400 MHz,  $\text{DMSO}-d_6$ )  $\delta$  10.27 (s, 1H), 8.81 (d,  $J = 7.5$  Hz, 1H), 8.66 (d,  $J = 8.3$  Hz, 1H), 8.31 (dd,  $J = 13.2, 7.1$  Hz, 1H), 8.09 (d,  $J = 7.7$  Hz, 1H), 7.99-7.85 (m, 4H), 7.80 (d,  $J = 7.8$  Hz, 1H), 7.65 (t,  $J = 6.8$  Hz, 1H), 7.50-7.29 (m, 5H), 6.97 (t,  $J = 7.3$  Hz, 1H), 6.75 (d,  $J = 7.4$  Hz, 1H), 6.63 (t,  $J = 7.0$  Hz, 1H), 5.60 (d,  $J = 11.6$  Hz, 1H), 2.29 (s, 6H).  $^{13}\text{C}$  NMR (101 MHz,  $\text{DMSO}-d_6$ )  $\delta$  156.3 (d,  $J = 10.5$  Hz), 133.4 (dd,  $J = 49.1, 7.8$  Hz), 133.2 (dd,  $J = 49.7, 7.1$  Hz), 132.5, 132.3 (d,  $J = 3.6$  Hz), 131.9 (d,  $J = 9.5$  Hz), 131.2, 130.2, 129.4, 128.9 (d,  $J = 8.5$  Hz), 128.8, 126.6, 126.0, 124.9 (d,  $J = 11.9$  Hz), 124.3 (d,  $J = 13.2$  Hz), 117.8, 117.4 (d,  $J = 5.2$  Hz), 115.2, 58.6 (d,  $J = 84.9$  Hz), 43.5 (d,  $J = 7.4$  Hz).  $^{31}\text{P}$  NMR (162 MHz,  $\text{DMSO}-d_6$ )  $\delta$  36.85. IR (KBr): 3441, 3354, 3056, 2936, 2862, 2828, 2784, 2253, 2125, 1506, 1455, 1275, 1151, 1052, 1026, 1006, 801, 774, 763, 674, 567, 486, 457  $\text{cm}^{-1}$ . HR-ESI-MS: calculated  $m/z$   $[\text{M}+\text{Na}]^+$  for  $[\text{C}_{29}\text{H}_{26}\text{NO}_2\text{PNa}]^+$ : 474.1599, found: 474.1595.

**((dimethylamino)(2-hydroxyphenyl)methyl)di-*o*-tolylphosphine oxide (4na)**

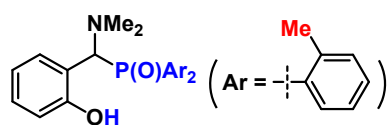

Purification via silica gel column chromatography (petroleum ether/ethyl acetate = 1/1, v/v)

White solid, m. p.: 169-170 °C.

75.8 mg, 80% yield.

$^1\text{H}$  NMR (400 MHz,  $\text{DMSO}-d_6$ )  $\delta$  9.80 (s, 1H), 8.06 (dd,  $J = 11.1, 8.0$  Hz, 1H), 7.80 (d,  $J = 7.4$  Hz, 1H), 7.54 (dd,  $J = 11.2, 8.0$  Hz, 1H), 7.40 (dt,  $J = 23.7, 7.0$  Hz, 2H), 7.21 (t,  $J = 7.1$  Hz, 2H), 7.11-6.98 (m, 3H), 6.78 (d,  $J = 8.0$  Hz, 1H), 6.70 (t,  $J = 7.4$  Hz, 1H), 5.32 (d,  $J = 11.9$  Hz, 1H), 2.29 (s, 6H), 2.23 (s, 3H), 2.13 (s, 3H).  $^{13}\text{C}$  NMR (101 MHz,  $\text{DMSO}-d_6$ )  $\delta$  156.1 (d,  $J = 8.9$  Hz), 141.4 (d,  $J = 7.5$  Hz), 140.7 (d,  $J = 7.9$  Hz), 132.7 (d,  $J = 2.8$  Hz), 132.6, 132.4 (d,  $J = 78.0$  Hz), 132.4 (d,  $J = 9.8$  Hz) (overlapped), 132.0 (d,  $J = 8.8$  Hz), 131.5 (d,  $J = 10.0$  Hz), 131.4, 131.3, 131.2 (d,  $J = 1.9$  Hz), 131.1, 128.9, 125.41 (d,  $J = 11.1$  Hz), 125.0 (d,  $J = 11.0$  Hz), 118.0, 117.1 (d,  $J = 5.1$  Hz), 115.2, 43.4 (d,  $J = 7.8$  Hz), 20.5 (dd,  $J = 22.4, 3.4$  Hz).  $^{31}\text{P}$  NMR (162 MHz,  $\text{DMSO}-d_6$ )  $\delta$  34.10. IR (KBr): 3567, 3503, 3447, 2956, 2925, 2855, 2358, 2342, 2331, 1772, 1457, 1275, 1262, 1174, 1145, 1030, 990, 946, 764, 751, 690, 566, 531, 458  $\text{cm}^{-1}$ . HR-ESI-MS: calculated  $m/z$   $[\text{M}+\text{H}]^+$  for  $[\text{C}_{23}\text{H}_{27}\text{NO}_2\text{P}]^+$ : 380.1779, found: 380.1773.

**((dimethylamino)(2-hydroxyphenyl)methyl)bis(2-ethylphenyl)phosphine oxide (4oa)**

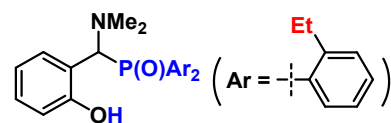

Purification via silica gel column chromatography (petroleum ether/ethyl acetate = 2/1, v/v)

White solid, m. p.: 165-166 °C.

83.5 mg, 82% yield.

$^1\text{H}$  NMR (400 MHz,  $\text{DMSO}-d_6$ )  $\delta$  9.98 (s, 1H), 8.04-7.93 (m, 1H), 7.83 (d,  $J = 6.0$  Hz, 1H), 7.57-7.42 (m, 2H), 7.34 (s, 1H), 7.27 (d,  $J = 6.0$  Hz, 2H), 7.12-6.98 (m, 3H), 6.81 (d,  $J = 7.5$



Hz, 1H), 6.69 (t,  $J = 6.8$  Hz, 1H), 5.30 (d,  $J = 11.2$  Hz, 1H), 2.90-2.69 (m, 3H), 2.66-2.52 (m, 1H), 2.28 (s, 6H), 0.79 (t,  $J = 6.8$  Hz, 3H), 0.66 (t,  $J = 6.8$  Hz, 3H).  $^{13}\text{C}$  NMR (101 MHz, DMSO- $d_6$ )  $\delta$  156.2 (d,  $J = 8.8$  Hz), 148.1 (d,  $J = 7.7$  Hz), 147.4 (d,  $J = 7.6$  Hz), 133.0, 132.6, 132.0 (d,  $J = 9.9$  Hz), 131.7 (d,  $J = 87.9$  Hz), 131.4, 131.3, 131.2, 130.0 (d,  $J = 10.0$  Hz), 129.8 (d,  $J = 9.9$  Hz), 128.8, 125.3 (d,  $J = 11.2$  Hz), 124.8 (d,  $J = 10.9$  Hz), 117.8, 117.3 (d,  $J = 5.1$  Hz), 115.2, 57.5 (d,  $J = 98.7$  Hz), 43.4 (d,  $J = 7.6$  Hz), 25.9 (dd,  $J = 19.9, 3.1$  Hz), 15.2 (d,  $J = 34.4$  Hz).  $^{31}\text{P}$  NMR (162 MHz, DMSO- $d_6$ )  $\delta$  34.85. IR (KBr): 3648, 3627, 3064, 2966, 2934, 2871, 2830, 2785, 1683, 1594, 1507, 1456, 1375, 1267, 1148, 1087, 1021, 844, 790, 754, 572, 560, 529, 508, 475  $\text{cm}^{-1}$ . HR-ESI-MS: calculated  $m/z$   $[\text{M}+\text{Na}]^+$  for  $[\text{C}_{25}\text{H}_{30}\text{NO}_2\text{PNa}]^+$ : 430.1912, found: 430.1909.

**((dimethylamino)(2-hydroxyphenyl)methyl)di(thiophen-2-yl)phosphine oxide (4pa)**

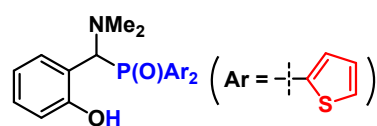

Purification via silica gel column chromatography

(petroleum ether/ethyl acetate = 2/1, v/v)

Pale brown solid, m. p.: 160-161  $^{\circ}\text{C}$ .

79.9 mg, 88% yield.

$^1\text{H}$  NMR (400 MHz, DMSO- $d_6$ )  $\delta$  9.68 (s, 1H), 8.03 (t,  $J = 3.6$  Hz, 1H), 7.85 (t,  $J = 3.6$  Hz, 1H), 7.69 (d,  $J = 7.6$  Hz, 1H), 7.53 (dd,  $J = 5.7, 3.4$  Hz, 1H), 7.30 (dd,  $J = 5.2, 3.6$  Hz, 1H), 7.25 (s, 1H), 7.06 (d,  $J = 5.0$  Hz, 2H), 6.84-6.66 (m, 2H), 4.91 (d,  $J = 12.8$  Hz, 1H), 2.30 (s, 6H).  $^{13}\text{C}$  NMR (101 MHz, DMSO- $d_6$ )  $\delta$  156.5 (d,  $J = 9.9$  Hz), 135.5 (d,  $J = 9.4$  Hz), 135.0, 134.7 (d,  $J = 9.3$  Hz), 134.3 (d,  $J = 3.4$  Hz), 134.2 (d,  $J = 4.0$  Hz), 133.6 (d,  $J = 72.8$  Hz), 131.9 (d,  $J = 4.6$  Hz), 129.2, 128.2 (d,  $J = 13.4$  Hz), 128.0 (d,  $J = 14.1$  Hz), 118.1, 116.8 (d,  $J = 5.0$  Hz), 115.2, 61.5 (d,  $J = 101.0$  Hz), 43.6 (d,  $J = 8.4$  Hz).  $^{31}\text{P}$  NMR (162 MHz, DMSO- $d_6$ )  $\delta$  21.67. IR (KBr): 3650, 3577, 3420, 2365, 2037, 1718, 1684, 1559, 1457, 1339, 1220, 1156, 1095, 1021, 721, 577, 526  $\text{cm}^{-1}$ . HR-ESI-MS: calculated  $m/z$   $[\text{M}+\text{Na}]^+$  for  $[\text{C}_{17}\text{H}_{18}\text{NO}_2\text{PS}_2\text{Na}]^+$ : 386.0414, found: 386.0407.

**((dimethylamino)(2-hydroxyphenyl)methyl)(4-fluorophenyl)(phenyl)phosphine oxide (4qa-1)**

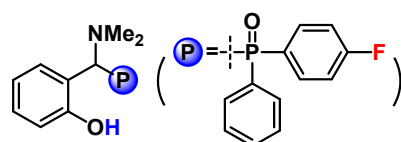

Purification via silica gel column chromatography

(petroleum ether/ethyl acetate = 2/1, v/v)

White solid, m. p.: 164-165  $^{\circ}\text{C}$ .

36.9 mg, 40% yield.

$^1\text{H}$  NMR (400 MHz,  $\text{CDCl}_3$ )  $\delta$  10.28 (s, 1H), 7.99-7.90 (m, 2H), 7.59-7.50 (m, 2H), 7.32 (t,  $J = 7.2$  Hz, 1H), 7.25-7.14 (m, 4H), 7.04 (t,  $J = 7.5$  Hz, 1H), 6.91 (t,  $J = 8.1$  Hz, 2H), 6.55 (t,  $J = 7.3$  Hz, 1H), 4.55 (d,  $J = 9.5$  Hz, 1H), 2.40 (s, 6H).  $^{13}\text{C}$  NMR (101 MHz,  $\text{CDCl}_3$ )  $\delta$  166.3 (d,  $J = 3.1$  Hz), 163.8 (d,  $J = 3.2$  Hz), 157.2 (d,  $J = 5.3$  Hz), 134.0 (d,  $J = 18.7$  Hz), 134.0 (overlapped), 132.9 (d,  $J = 7.3$  Hz), 131.8 (d,  $J = 2.4$  Hz), 131.2 (d,  $J = 98.3$  Hz), 130.9 (d,  $J = 8.9$  Hz), 129.7, 128.4 (d,  $J = 11.5$  Hz), 128.1 (dd,  $J = 100.9, 3.3$  Hz), 118.9, 117.3 (d,  $J = 51.1$  Hz), 116.1 (d,  $J = 21.2$  Hz), 115.9 (d,  $J = 21.3$  Hz), 68.1 (d,  $J = 83.8$  Hz), 44.6 (d,  $J = 7.5$  Hz).  $^{31}\text{P}$  NMR (162 MHz,  $\text{CDCl}_3$ )  $\delta$  33.90. IR (KBr): 3063, 2942, 2869, 2831, 2787, 1593, 1499, 1455, 1265, 1236, 1161, 1118, 1026, 830, 747, 693, 555, 519  $\text{cm}^{-1}$ . HR-ESI-MS: calculated  $m/z$   $[\text{M}+\text{Na}]^+$  for  $[\text{C}_{21}\text{H}_{21}\text{FNO}_2\text{PNa}]^+$ : 392.1192, found: 392.1181.

**((dimethylamino)(2-hydroxyphenyl)methyl)(4-fluorophenyl)(phenyl)phosphine oxide (4qa-2)**

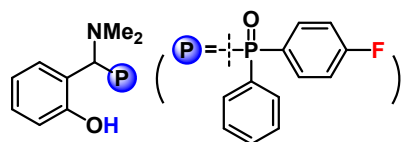

Purification via silica gel column chromatography (petroleum ether/ethyl acetate = 1/1, v/v)  
 Pale yellow solid, m. p.: 111-112 °C.  
 39.7 mg, 43% yield.

**<sup>1</sup>H NMR** (400 MHz, CDCl<sub>3</sub>) δ 10.16 (s, 1H), 7.94 (dd, *J* = 9.4, 8.7 Hz, 2H), 7.63-7.44 (m, 5H), 7.08 (t, *J* = 7.4 Hz, 1H), 6.91 (dt, *J* = 15.5, 7.6 Hz, 3H), 6.54 (dt, *J* = 14.6, 7.4 Hz, 2H), 4.27 (d, *J* = 7.6 Hz, 1H), 2.40 (s, 6H). **<sup>13</sup>C NMR** (101 MHz, CDCl<sub>3</sub>) δ 166.1 (d, *J* = 3.2 Hz), 163.6 (d, *J* = 3.3 Hz), 157.5 (d, *J* = 4.4 Hz), 133.6 (d, *J* = 19.0 Hz), 133.6 (overlapped), 132.6 (d, *J* = 7.6 Hz), 132.2 (d, *J* = 2.5 Hz), 132.0 (d, *J* = 97.9 Hz), 131.3 (d, *J* = 8.7 Hz), 129.8 (d, *J* = 1.1 Hz), 128.8 (d, *J* = 11.6 Hz), 127.4 (dd, *J* = 101.2, 3.0 Hz), 119.0, 117.8, 117.4, 115.7 (d, *J* = 21.3 Hz), 115.6 (d, *J* = 21.3 Hz), 69.8 (d, *J* = 82.3 Hz), 44.9 (d, *J* = 7.3 Hz). **<sup>31</sup>P NMR** (162 MHz, CDCl<sub>3</sub>) δ 32.87. **IR** (KBr): 3065, 2941, 2868, 2831, 2786, 2735, 2613, 1907, 1665, 1593, 1500, 1455, 1396, 1276, 1237, 1161, 1118, 1026, 909, 831, 737, 555, 532, 466 cm<sup>-1</sup>. **HR-ESI-MS**: calculated *m/z* [M+Na]<sup>+</sup> for [C<sub>21</sub>H<sub>21</sub>FNO<sub>2</sub>PNa]<sup>+</sup>: 392.1192, found: 392.1181.

**((dimethylamino)(2-hydroxy-6-methylphenyl)methyl)diphenylphosphine oxide (4ab)**

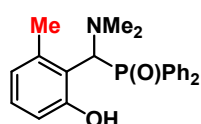

Purification via silica gel column chromatography (petroleum ether/ethyl acetate = 1/1, v/v)  
 White solid, m. p.: 163-164 °C.  
 57.5 mg, 63% yield.

**<sup>1</sup>H NMR** (400 MHz, CDCl<sub>3</sub>) δ 10.64 (s, 1H), 7.94 (ddd, *J* = 10.8, 8.0, 1.4 Hz, 2H), 7.59-7.44 (m, 5H), 7.32 (td, *J* = 7.4, 1.3 Hz, 1H), 7.22 (td, *J* = 7.5, 3.0 Hz, 2H), 6.93 (t, *J* = 4.5 Hz, 1H), 6.37 (d, *J* = 4.8 Hz, 2H), 4.23 (d, *J* = 7.9 Hz, 1H), 2.40 (s, 6H), 2.23 (s, 3H). **<sup>13</sup>C NMR** (101 MHz, CDCl<sub>3</sub>) δ 155.9 (d, *J* = 3.9 Hz), 132.3 (d, *J* = 96.8 Hz), 132.0 (d, *J* = 2.4 Hz), 131.7 (d, *J* = 2.5 Hz), 131.4 (d, *J* = 8.5 Hz), 131.4 (d, *J* = 99.0 Hz), 131.2 (d, *J* = 8.8 Hz), 130.8 (d, *J* = 1.3 Hz), 130.3 (d, *J* = 7.7 Hz), 128.7 (d, *J* = 11.4 Hz), 128.2 (d, *J* = 11.5 Hz), 126.7 (d, *J* = 1.2 Hz), 118.3, 117.0, 71.7 (d, *J* = 79.8 Hz), 45.0 (d, *J* = 7.0 Hz), 16.6. **<sup>31</sup>P NMR** (162 MHz, CDCl<sub>3</sub>) δ 33.31. **IR** (KBr): 3058, 2962, 2924, 2857, 2785, 1592, 1468, 1438, 1261, 1145, 1097, 1025, 800, 747, 697, 660, 550, 537, 507 cm<sup>-1</sup>. **HR-ESI-MS**: calculated *m/z* [M+H]<sup>+</sup> for [C<sub>22</sub>H<sub>25</sub>NO<sub>2</sub>P]<sup>+</sup>: 366.1623, found: 366.1620.

**((dimethylamino)(2-hydroxy-3-methylphenyl)methyl)diphenylphosphine oxide (4ab')**

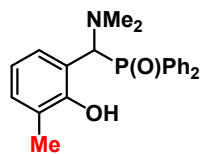

Purification via silica gel column chromatography (petroleum ether/ethyl acetate = 1/2, v/v)  
 White solid, m. p.: 95-96 °C.  
 28.3 mg, 31% yield.

**<sup>1</sup>H NMR** (400 MHz, CDCl<sub>3</sub>) δ 10.86 (s, 1H), 7.99-7.91 (m, 2H), 7.60 (dd, *J* = 15.2, 7.5 Hz, 3H), 7.36 (dd, *J* = 10.6, 8.3 Hz, 2H), 7.29 (t, *J* = 7.0 Hz, 1H), 7.13 (dd, *J* = 7.2, 4.9 Hz, 2H), 6.95 (t, *J* = 7.7 Hz, 1H), 6.77 (d, *J* = 8.0 Hz, 1H), 6.25 (d, *J* = 7.3 Hz, 1H), 4.42 (d, *J* = 3.0 Hz, 1H), 2.40 (s, 6H), 1.83 (s, 3H). **<sup>13</sup>C NMR** (101 MHz, CDCl<sub>3</sub>) δ 158.5 (d, *J* = 3.6 Hz), 137.2 (d, *J* = 5.6 Hz), 132.6 (d, *J* = 92.1 Hz), 132.1 (d, *J* = 1.7 Hz), 131.6 (d, *J* = 1.8 Hz), 131.5 (d, *J* = 101.0 Hz), 131.5 (d, *J* = 4.6 Hz), 131.4 (d, *J* = 3.1 Hz), 129.3, 128.8 (d, *J* = 11.3 Hz), 127.7 (d, *J* = 11.8 Hz), 121.3, 118.4 (d, *J* = 4.0 Hz), 115.6, 67.3 (d, *J* = 76.9 Hz), 45.6 (d, *J* = 7.0 Hz), 20.6. **<sup>31</sup>P NMR** (162 MHz, CDCl<sub>3</sub>) δ 30.62. **IR** (KBr): 3728, 3663, 3631, 3056, 2960, 2867, 2831, 2784, 1584, 1467, 1438, 1276, 1225, 1175, 1115, 1005, 953, 864, 749, 696, 572, 545,

502 cm<sup>-1</sup>. **HR-ESI-MS**: calculated m/z [M+H]<sup>+</sup> for [C<sub>22</sub>H<sub>25</sub>NO<sub>2</sub>P]<sup>+</sup>: 366.1623, found: 366.1619.

**((dimethylamino)(2-hydroxy-4-methylphenyl)methyl)diphenylphosphine oxide (4ac) and ((dimethylamino)(2-hydroxy-5-methylphenyl)methyl)diphenylphosphine oxide (4ac')**

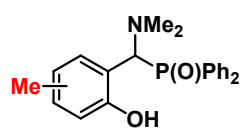

Purification via silica gel column chromatography (petroleum ether/ethyl acetate = 2/1, v/v)

White solid, m. p.: 161-163 °C.

67.6 mg, 74% yield (**4ac/4ac'** = 1:1.4).

<sup>1</sup>H NMR (400 MHz, DMSO-*d*<sub>6</sub>) δ 9.74 (d, 1H), 7.99-7.89 (m, 2H), 7.65 (dd, *J* = 15.9, 7.9 Hz, 3H), 7.54 (d, *J* = 2.1 Hz, 4H), 7.40-7.29 (m, 3H), 6.86 (dd, *J* = 8.2, 1.4 Hz, 0.4H), 6.73 (d, *J* = 8.1 Hz, 0.5H), 6.65 (s, 0.6H), 6.55 (d, *J* = 7.8 Hz, 0.6H), 5.27 (dd, 1H), 2.28 (d, 6H), 2.14 (d, 3H). <sup>13</sup>C NMR (101 MHz, DMSO-*d*<sub>6</sub>) δ 156.3 (d, *J* = 8.5 Hz), 154.1 (d, *J* = 8.2 Hz), 138.3, 134.1 (d, *J* = 98.1 Hz), 134.0 (d, *J* = 98.2 Hz), 133.4 (d, *J* = 92.7 Hz), 133.3 (d, *J* = 93.2 Hz), 132.7 (d, *J* = 4.5 Hz), 132.3 (d, *J* = 4.2 Hz), 131.2, 130.7 (d, *J* = 8.5 Hz), 130.2-130.0 (m), 129.5, 128.4 (d, *J* = 11.0 Hz), 128.3 (d, *J* = 10.7 Hz), 126.3, 119.0, 116.5 (d, *J* = 4.2 Hz), 116.0, 115.2, 113.7 (d, *J* = 4.4 Hz), 58.2 (d, *J* = 90.3 Hz), 57.9 (d, *J* = 92.1 Hz), 43.4 (d, *J* = 4.2 Hz), 20.8 (d, *J* = 1.5 Hz), 20.4 (d, *J* = 1.6 Hz). <sup>31</sup>P NMR (162 MHz, DMSO-*d*<sub>6</sub>) δ 31.74, 31.66. **IR** (KBr): 3503, 3447, 3393, 2954, 2924, 2853, 2358, 1653, 1555, 1507, 1458, 1448, 1261, 1025, 998, 825, 764, 750, 699, 537 cm<sup>-1</sup>. **HR-ESI-MS**: calculated m/z [M+Na]<sup>+</sup> for [C<sub>22</sub>H<sub>24</sub>NO<sub>2</sub>PNa]<sup>+</sup>: 388.1442, found: 388.1432.

**((4-(tert-butyl)-2-hydroxyphenyl)(dimethylamino)methyl)diphenylphosphine oxide (4ad) and ((5-(tert-butyl)-2-hydroxyphenyl)(dimethylamino)methyl)diphenylphosphine oxide (4ad')**

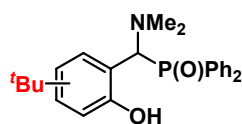

Purification via silica gel column chromatography (petroleum ether/ethyl acetate = 2/1, v/v)

White solid, m. p.: 166-168 °C.

85.5 mg, 84% yield (**4ad/4ad'** = 1:4).

<sup>1</sup>H NMR (400 MHz, CDCl<sub>3</sub>) δ 10.51 (s, 1H), 8.14-8.05 (m, 0.4H), 7.98-7.90 (m, 2H), 7.64-7.44 (m, 5.8H), 7.44-7.36 (m, 0.4H), 7.30 (td, *J* = 7.4, 1.1 Hz, 1H), 7.20 (td, *J* = 7.6, 2.9 Hz, 2H), 7.11-7.05 (m, 0.4H), 6.90 (d, *J* = 0.8 Hz, 1H), 6.85 (d, *J* = 1.7 Hz, 0.2H), 6.62 (d, *J* = 1.3 Hz, 0.2H), 6.51-6.43 (m, 2H), 4.87 (d, *J* = 1.9 Hz, 0.2H), 4.23 (d, *J* = 7.6 Hz, 1H), 2.40 (s, 1.2H), 2.38 (s, 6H), 1.20 (s, 9H), 1.18 (s, 1.8H). <sup>13</sup>C NMR (101 MHz, CDCl<sub>3</sub>) δ 158.7 (d, *J* = 3.7 Hz), 157.2 (d, *J* = 4.0 Hz), 154.5, 153.4, 133.1, 132.4 (d, *J* = 7.8 Hz), 132.3 (d, *J* = 96.7 Hz), 132.3 (d, *J* = 2.3 Hz), 132.1 (d, *J* = 2.7 Hz), 131.8 (d, *J* = 85.8 Hz), 131.6 (d, *J* = 2.3 Hz), 131.5 (d, *J* = 8.6 Hz), 131.2, 131.1 (d, *J* = 8.9 Hz), 129.0 (d, *J* = 11.5 Hz), 128.8 (d, *J* = 11.7 Hz), 128.3 (d, *J* = 11.5 Hz), 127.6 (d, *J* = 12.0 Hz), 116.2, 115.2, 114.4, 70.7 (d, *J* = 81.5 Hz), 70.4 (d, *J* = 76.4 Hz), 45.6 (d, *J* = 6.7 Hz), 45.0 (d, *J* = 7.2 Hz), 34.7, 34.6, 31.4, 31.2. <sup>31</sup>P NMR (162 MHz, CDCl<sub>3</sub>) δ 34.01, 32.14. **IR** (KBr): 3079, 3059, 2964, 2867, 2830, 2786, 1610, 1437, 1417, 1242, 1171, 1152, 1118, 1027, 939, 871, 740, 721, 694, 540, 489 cm<sup>-1</sup>. **HR-ESI-MS**: calculated m/z [M+Na]<sup>+</sup> for [C<sub>25</sub>H<sub>30</sub>NO<sub>2</sub>PNa]<sup>+</sup>: 430.1912, found: 430.1905.

**((dimethylamino)(2-hydroxy-4-methoxyphenyl)methyl)diphenylphosphine oxide (4ae)**

and ((dimethylamino)(2-hydroxy-5-methoxyphenyl)methyl)diphenylphosphine oxide (4ae')

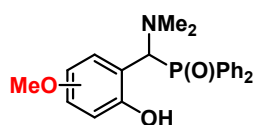

Purification via silica gel column chromatography (petroleum ether/ethyl acetate = 2/1, v/v)

Yellow solid, m. p.: 147-149 °C.

81.9 mg, 86% yield (4ae/4ae' = 1:1.2).

<sup>1</sup>H NMR (400 MHz, CDCl<sub>3</sub>) δ 10.25 (s, 1H), 8.01-7.91 (m, 2H), 7.62-7.47 (m, 5H), 7.31 (t, *J* = 7.3 Hz, 1H), 7.26-7.17 (m, 2H), 6.82 (dd, *J* = 13.2, 8.7 Hz, 1H), 6.66-6.60 (m, 0.6H), 6.51-6.41 (m, 1H), 6.18-6.11 (m, 0.4H), 4.50 (t, 1H), 3.63 (s, 1.3H), 3.52 (s, 1.7H), 2.40 (d, 6H). <sup>13</sup>C NMR (101 MHz, CDCl<sub>3</sub>) δ 160.8, 158.6 (d, *J* = 4.8 Hz), 151.9, 151.4 (d, *J* = 5.2 Hz), 133.3 (d, *J* = 103.3 Hz), 133.7, 132.2 (d, *J* = 98.1 Hz), 131.7, 131.6, 131.4 (d, *J* = 3.2 Hz), 131.3 (d, *J* = 98.9 Hz), 131.3 (d, *J* = 2.9 Hz), 131.1, 131.0, 130.9, 128.6 (d, *J* = 11.4 Hz), 128.6 (d, *J* = 11.5 Hz), 128.3 (d, *J* = 11.6 Hz), 128.3 (d, *J* = 11.6 Hz), 118.0 (d, *J* = 15.8 Hz), 117.3 (d, *J* = 7.2 Hz), 115.5, 109.3, 105.5, 102.4, 68.9-67.0 (m), 55.7, 55.1, 44.8 (d, *J* = 7.4 Hz), 44.5 (d, *J* = 7.4 Hz). <sup>31</sup>P NMR (162 MHz, CDCl<sub>3</sub>) δ 34.73, 33.25. IR (KBr): 3054, 2988, 2949, 2830, 2785, 1738, 1615, 1507, 1436, 1375, 1265, 1167, 1149, 1117, 1028, 912, 743, 699, 531 cm<sup>-1</sup>. HR-ESI-MS: calculated *m/z* [M+H]<sup>+</sup> for [C<sub>22</sub>H<sub>25</sub>NO<sub>3</sub>P]<sup>+</sup>: 382.1572, found: 382.1562.

((4-chloro-2-hydroxyphenyl)(dimethylamino)methyl)diphenylphosphine oxide (4af) and ((5-chloro-2-hydroxyphenyl)(dimethylamino)methyl)diphenylphosphine oxide (4af')

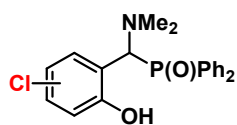

Purification via silica gel column chromatography (petroleum ether/ethyl acetate = 2/1, v/v)

Green solid, m. p.: 153-155 °C.

89.5 mg, 93% yield (4af/4af' = 1:4).

<sup>1</sup>H NMR (400 MHz, DMSO-*d*<sub>6</sub>) δ 10.22 (d, 1H), 7.93 (dd, *J* = 9.3, 5.2 Hz, 2H), 7.75 (d, *J* = 9.6 Hz, 1H), 7.67-7.59 (m, 2H), 7.53 (s, 3H), 7.33 (d, *J* = 7.4 Hz, 3H), 7.13-7.01 (m, 1H), 6.81 (d, *J* = 8.7 Hz, 1H), 5.24 (d, *J* = 11.3 Hz, 1H), 2.26 (s, 6H). <sup>13</sup>C NMR (101 MHz, DMSO-*d*<sub>6</sub>) δ 157.6 (d, *J* = 8.6 Hz), 155.5 (d, *J* = 8.4 Hz), 133.6 (d, *J* = 3.7 Hz), 133.6 (d, *J* = 98.8 Hz) (overlapped), 133.4 (d, *J* = 99.0 Hz), 133.0, 133.0 (d, *J* = 93.4 Hz) (overlapped), 132.9 (d, *J* = 93.7 Hz), 131.6, 131.5 (d, *J* = 4.2 Hz), 130.9 (d, *J* = 8.6 Hz), 130.2 (d, *J* = 8.5 Hz), 129.3, 128.9, 128.7 (d, *J* = 11.4 Hz), 128.5 (d, *J* = 11.0 Hz), 121.8, 119.1 (d, *J* = 4.3 Hz), 118.2, 117.1, 117.0, 116.3 (d, *J* = 4.5 Hz), 115.2, 57.7 (d, *J* = 90.1 Hz), 57.5 (d, *J* = 88.2 Hz), 43.5 (d, *J* = 4.9 Hz). <sup>31</sup>P NMR (162 MHz, DMSO-*d*<sub>6</sub>) δ 31.88, 31.79. IR (KBr): 3736, 3671, 3650, 3057, 2926, 2855, 2831, 2786, 2728, 2361, 1744, 1577, 1497, 1437, 1420, 1271, 1164, 1116, 1027, 820, 721, 693, 648, 553, 532 cm<sup>-1</sup>. HR-ESI-MS: calculated *m/z* [M+Na]<sup>+</sup> for [C<sub>21</sub>H<sub>21</sub>ClNO<sub>2</sub>PNa]<sup>+</sup>: 408.0896, found: 408.0886.

((4,5-difluoro-2-hydroxyphenyl)(dimethylamino)methyl)diphenylphosphine oxide (4ag)

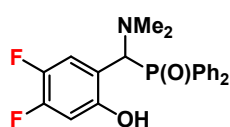

Purification via silica gel column chromatography (petroleum ether/ethyl acetate = 1/2, v/v)

White solid, m. p.: 154-155 °C.

87.1 mg, 90% yield.

<sup>1</sup>H NMR (400 MHz, DMSO-*d*<sub>6</sub>) δ 10.30 (s, 1H), 7.97-7.86 (m, 2H), 7.75-7.67 (m, 1H), 7.65-7.58 (m, 2H), 7.53 (d, *J* = 12.7 Hz, 3H), 7.41-7.29 (m, 3H), 6.72 (dd, *J* = 12.2, 7.2 Hz, 1H), 5.17 (d, *J* = 11.4 Hz, 1H), 2.25 (s, 6H). <sup>13</sup>C NMR (101 MHz, DMSO-*d*<sub>6</sub>) δ 153.3 (t, *J* = 8.6

Hz), 149.9 (d,  $J = 13.4$  Hz), 147.4 (d,  $J = 13.8$  Hz), 142.8 (d,  $J = 12.3$  Hz), 140.5 (d,  $J = 12.5$  Hz), 133.1 (d,  $J = 99.1$  Hz), 132.8 (d,  $J = 93.6$  Hz), 131.5, 130.8 (d,  $J = 8.7$  Hz), 130.1 (d,  $J = 8.6$  Hz), 128.6 (d,  $J = 11.3$  Hz), 128.4 (d,  $J = 11.0$  Hz), 119.7 (dd,  $J = 18.5, 3.4$  Hz), 113.6 (dd,  $J = 7.8, 3.9$  Hz), 103.9 (d,  $J = 18.8$  Hz), 57.3 (d,  $J = 90.1$  Hz), 43.3 (d,  $J = 7.1$  Hz).  $^{31}\text{P}$  NMR (162 MHz, DMSO- $d_6$ )  $\delta$  31.66. IR (KBr): 3060, 2990, 2944, 2868, 2831, 2787, 1618, 1528, 1437, 1322, 1265, 1225, 1159, 1119, 1098, 1027, 885, 746, 724, 694, 601, 538, 491  $\text{cm}^{-1}$ . HR-ESI-MS: calculated  $m/z$   $[\text{M}+\text{H}]^+$  for  $[\text{C}_{21}\text{H}_{21}\text{F}_2\text{NO}_2\text{P}]^+$ : 388.1278, found: 388.1268.

**((dimethylamino)(3-hydroxynaphthalen-2-yl)methyl)diphenylphosphine oxide (4ah)**

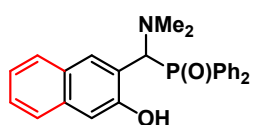

Purification via silica gel column chromatography (petroleum ether/ethyl acetate = 1/1, v/v)

White solid, m. p.: 171-172 °C.

87.2 mg, 87% yield.

$^1\text{H}$  NMR (400 MHz,  $\text{CDCl}_3$ )  $\delta$  10.64 (s, 1H), 8.01 (dd,  $J = 9.5, 8.4$  Hz, 2H), 7.56 (dd,  $J = 18.2, 8.5$  Hz, 6H), 7.46-7.40 (m, 2H), 7.33-7.27 (m, 2H), 7.21-7.07 (m, 4H), 4.78 (d,  $J = 8.4$  Hz, 1H), 2.46 (s, 6H).  $^{13}\text{C}$  NMR (101 MHz,  $\text{CDCl}_3$ )  $\delta$  155.1 (d,  $J = 4.6$  Hz), 134.7, 132.4 (d,  $J = 7.7$  Hz), 132.3 (d,  $J = 98.0$  Hz), 131.3 (d,  $J = 98.3$  Hz), 132.1 (d,  $J = 2.2$  Hz), 131.7 (d,  $J = 2.7$  Hz), 131.5 (d,  $J = 8.6$  Hz), 131.0 (d,  $J = 8.8$  Hz), 128.7 (d,  $J = 11.7$  Hz), 128.3 (d,  $J = 11.7$  Hz), 127.6, 126.4, 126.0, 123.0, 120.7, 111.7, 68.8 (d,  $J = 80.8$  Hz), 44.9 (d,  $J = 7.3$  Hz).  $^{31}\text{P}$  NMR (162 MHz,  $\text{CDCl}_3$ )  $\delta$  33.87. IR (KBr): 3737, 3679, 3652, 3058, 2924, 2858, 2831, 2786, 2707, 2613, 1664, 1629, 1599, 1450, 1438, 1398, 1364, 1236, 1168, 1154, 1118, 1027, 913, 871, 745, 722, 693, 645, 589, 552, 535, 478  $\text{cm}^{-1}$ . HR-ESI-MS: calculated  $m/z$   $[\text{M}+\text{H}]^+$  for  $[\text{C}_{25}\text{H}_{25}\text{NO}_2\text{P}]^+$ : 402.1623, found: 402.1613.

**((diethylamino)(2-hydroxyphenyl)methyl)diphenylphosphine oxide (4aab)**

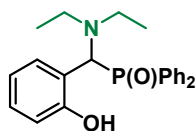

Purification via silica gel column chromatography (petroleum ether/ethyl acetate = 2/1, v/v)

White solid, m. p.: 157-158 °C.

71.1 mg, 75% yield.

$^1\text{H}$  NMR (400 MHz, DMSO- $d_6$ )  $\delta$  9.74 (s, 1H), 7.88-7.77 (m, 2H), 7.71 (d,  $J = 7.6$  Hz, 1H), 7.67-7.58 (m, 2H), 7.50 (s, 3H), 7.44-7.26 (m, 3H), 6.99 (t,  $J = 7.3$  Hz, 1H), 6.75 (d,  $J = 8.1$  Hz, 1H), 6.65 (t,  $J = 7.4$  Hz, 1H), 5.30 (d,  $J = 12.6$  Hz, 1H), 2.98 (dq,  $J = 14.1, 7.1$  Hz, 2H), 2.14 (dq,  $J = 13.1, 6.5$  Hz, 2H), 0.79 (t,  $J = 7.0$  Hz, 6H).  $^{13}\text{C}$  NMR (101 MHz, DMSO- $d_6$ )  $\delta$  156.2 (d,  $J = 8.9$  Hz), 133.9 (d,  $J = 98.9$  Hz), 133.2 (d,  $J = 91.7$  Hz), 132.0 (d,  $J = 4.1$  Hz), 131.3 (d,  $J = 1.6$  Hz), 131.1, 131.0 (d,  $J = 8.6$  Hz), 130.3 (d,  $J = 8.1$  Hz), 128.8, 128.3 (d,  $J = 10.7$  Hz), 128.1 (d,  $J = 11.3$  Hz), 119.6 (d,  $J = 5.3$  Hz), 118.3, 115.1, 53.7 (d,  $J = 91.6$  Hz), 45.2 (d,  $J = 7.1$  Hz), 13.7.  $^{31}\text{P}$  NMR (162 MHz, DMSO- $d_6$ )  $\delta$  32.05. IR (KBr): 3060, 2962, 2924, 2869, 2850, 2733, 1601, 1455, 1437, 1383, 1276, 1242, 1152, 1118, 751, 721, 698, 557, 529  $\text{cm}^{-1}$ . HR-ESI-MS: calculated  $m/z$   $[\text{M}+\text{H}]^+$  for  $[\text{C}_{23}\text{H}_{27}\text{NO}_2\text{P}]^+$ : 380.1779, found: 380.1777.

**((dipropylamino)(2-hydroxyphenyl)methyl)diphenylphosphine oxide (4aac)**

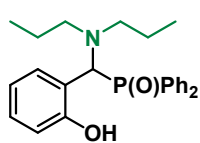

Purification via silica gel column chromatography (petroleum ether/ethyl acetate = 1/1, v/v)

White solid, m. p.: 162-163 °C.

80.4 mg, 79% yield.

**<sup>1</sup>H NMR** (400 MHz, DMSO-*d*<sub>6</sub>) δ 9.78 (s, 1H), 7.85 (s, 2H), 7.75 (d, *J* = 7.0 Hz, 1H), 7.69-7.58 (m, 2H), 7.49 (s, 3H), 7.31 (d, *J* = 6.2 Hz, 3H), 6.99 (t, *J* = 6.5 Hz, 1H), 6.78 (d, *J* = 7.5 Hz, 1H), 6.67 (t, *J* = 6.7 Hz, 1H), 5.35 (d, *J* = 12.6 Hz, 1H), 2.83 (d, *J* = 10.2 Hz, 2H), 2.14 (s, 2H), 1.38-1.12 (m, 4H), 0.58 (d, *J* = 6.3 Hz, 6H). **<sup>13</sup>C NMR** (101 MHz, DMSO-*d*<sub>6</sub>) δ 156.2 (d, *J* = 8.8 Hz), 133.8 (d, *J* = 98.0 Hz), 133.6 (d, *J* = 92.2 Hz), 132.0, 131.1, 131.0, 130.9, 130.1 (d, *J* = 8.0 Hz), 128.7, 128.1 (d, *J* = 24.1 Hz), 128.1 (overlapped), 119.3 (d, *J* = 4.8 Hz), 118.3, 115.0, 54.2, 53.5 (d, *J* = 6.0 Hz), 20.8, 11.5. **<sup>31</sup>P NMR** (162 MHz, DMSO-*d*<sub>6</sub>) δ 31.42. **IR** (KBr): 3057, 2958, 2927, 2870, 2732, 1600, 1454, 1437, 1379, 1266, 1163, 1117, 1052, 1026, 1004, 820, 742, 699, 557, 527, 419 cm<sup>-1</sup>. **HR-ESI-MS**: calculated *m/z* [M+H]<sup>+</sup> for [C<sub>25</sub>H<sub>31</sub>NO<sub>2</sub>P]<sup>+</sup>: 408.2092, found: 408.2082.

**((dibutylamino)(2-hydroxyphenyl)methyl)diphenylphosphine oxide (4aae)**

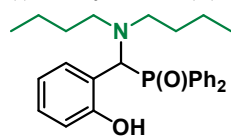

Purification via silica gel column chromatography (petroleum ether/ethyl acetate = 2/1, v/v)  
White solid, m. p.: 169-170 °C.  
83.8 mg, 77% yield.

**<sup>1</sup>H NMR** (400 MHz, DMSO-*d*<sub>6</sub>) δ 9.72 (s, 1H), 7.82 (dd, *J* = 9.9, 4.3 Hz, 2H), 7.73 (d, *J* = 7.6 Hz, 1H), 7.68-7.57 (m, 2H), 7.50 (s, 3H), 7.33 (dd, *J* = 11.9, 6.4 Hz, 3H), 7.06-6.92 (m, 1H), 6.82-6.61 (m, 2H), 5.32 (d, *J* = 12.7 Hz, 1H), 3.00-2.77 (m, 2H), 2.22-2.00 (m, 2H), 1.20 (d, *J* = 5.2 Hz, 4H), 0.98 (d, *J* = 6.9 Hz, 4H), 0.74 (t, *J* = 6.6 Hz, 6H). **<sup>13</sup>C NMR** (101 MHz, DMSO-*d*<sub>6</sub>) δ 156.2 (d, *J* = 6.5 Hz), 134.5-134.3 (m), 134.1-133.9 (m), 133.4 (d, *J* = 2.9 Hz), 133.1 (d, *J* = 5.7 Hz), 132.0, 131.1, 131.0, 130.9, 130.2 (d, *J* = 5.9 Hz), 128.7, 128.2 (d, *J* = 10.8 Hz), 128.0 (d, *J* = 10.4 Hz), 119.2, 118.3, 115.0, 53.8 (d, *J* = 94.1 Hz), 51.3, 30.1, 19.7, 14.1. **<sup>31</sup>P NMR** (162 MHz, DMSO-*d*<sub>6</sub>) δ 31.50. **IR** (KBr): 3059, 2956, 2930, 2870, 2735, 2615, 1601, 1455, 1438, 1378, 1266, 1163, 1118, 1105, 750, 721, 699, 558, 529 cm<sup>-1</sup>. **HR-ESI-MS**: calculated *m/z* [M+H]<sup>+</sup> for [C<sub>27</sub>H<sub>35</sub>NO<sub>2</sub>P]<sup>+</sup>: 436.2405, found: 436.2395.

**((2-hydroxyphenyl)(piperidin-1-yl)methyl)diphenylphosphine oxide (4aaf)**

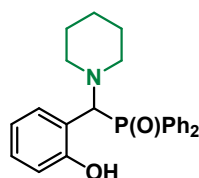

Purification via silica gel column chromatography (petroleum ether/ethyl acetate = 3/1, v/v)  
White solid, m. p.: 186-188 °C.  
50.9 mg, 52% yield.

**<sup>1</sup>H NMR** (400 MHz, CDCl<sub>3</sub>) δ 10.70 (s, 1H), 8.12-7.80 (m, 2H), 7.54 (dt, *J* = 10.9, 7.0 Hz, 5H), 7.34 (t, *J* = 7.1 Hz, 1H), 7.25 (dt, *J* = 7.1, 3.9 Hz, 2H), 7.06 (t, *J* = 7.6 Hz, 1H), 6.89 (d, *J* = 8.0 Hz, 1H), 6.63 (d, *J* = 7.3 Hz, 1H), 6.49 (t, *J* = 7.3 Hz, 1H), 4.38 (d, *J* = 8.9 Hz, 1H), 2.78 (s, 2H), 2.59 (d, *J* = 4.7 Hz, 2H), 1.47 (d, *J* = 5.0 Hz, 4H), 1.37-1.19 (m, 2H). **<sup>13</sup>C NMR** (101 MHz, CDCl<sub>3</sub>) δ 157.7 (d, *J* = 4.2 Hz), 132.9 (d, *J* = 8.2 Hz), 132.7, 132.0 (d, *J* = 2.7 Hz), 131.7 (d, *J* = 2.6 Hz), 131.5 (d, *J* = 8.5 Hz), 131.1 (d, *J* = 8.9 Hz), 131.0, 129.6, 128.5 (d, *J* = 11.6 Hz), 128.3 (d, *J* = 11.5 Hz), 118.8, 118.1, 117.9, 71.0 (d, *J* = 81.0 Hz), 53.6 (d, *J* = 6.9 Hz), 26.4, 23.9. **<sup>31</sup>P NMR** (162 MHz, CDCl<sub>3</sub>) δ 34.30. **IR** (KBr): 3059, 2932, 2852, 2809, 2753, 2607, 1601, 1485, 1454, 1437, 1383, 1266, 1163, 1118, 1096, 1040, 998, 860, 740, 721, 699, 557, 533 cm<sup>-1</sup>. **HR-ESI-MS**: calculated *m/z* [M+H]<sup>+</sup> for [C<sub>24</sub>H<sub>27</sub>NO<sub>2</sub>P]<sup>+</sup>: 392.1779, found: 392.1770.

**((2-hydroxyphenyl)(morpholino)methyl)diphenylphosphine oxide (4aag)**

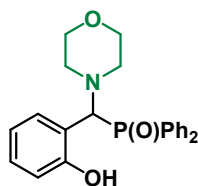

Purification via silica gel column chromatography (petroleum ether/ethyl acetate = 3/1, v/v)

White solid, m. p.: 150-151 °C.

61.9 mg, 63% yield.

**<sup>1</sup>H NMR** (400 MHz, CDCl<sub>3</sub>) δ 10.32 (s, 1H), 7.95 (dd, *J* = 9.8, 8.4 Hz, 2H), 7.66-7.47 (m, 5H), 7.35 (t, *J* = 7.0 Hz, 1H), 7.30-7.20 (m, 2H), 7.08 (t, *J* = 7.6 Hz, 1H), 6.89 (d, *J* = 8.1 Hz, 1H), 6.71 (d, *J* = 7.3 Hz, 1H), 6.55 (t, *J* = 7.3 Hz, 1H), 4.35 (d, *J* = 8.5 Hz, 1H), 3.57 (s, 4H), 2.83 (d, *J* = 3.6 Hz, 2H), 2.64-2.52 (m, 2H). **<sup>13</sup>C NMR** (101 MHz, CDCl<sub>3</sub>) δ 157.2 (d, *J* = 4.0 Hz), 133.1 (d, *J* = 8.6 Hz), 132.2 (d, *J* = 2.5 Hz), 132.0 (d, *J* = 2.1 Hz), 131.5 (d, *J* = 8.7 Hz), 131.2, 131.1 (d, *J* = 8.9 Hz), 130.9 (d, *J* = 98.8 Hz), 130.1, 128.7 (d, *J* = 11.8 Hz), 128.5 (d, *J* = 11.5 Hz), 119.2, 118.4, 117.2, 70.4 (d, *J* = 82.4 Hz), 67.2, 52.5 (d, *J* = 6.8 Hz). **<sup>31</sup>P NMR** (162 MHz, CDCl<sub>3</sub>) δ 34.22. **IR** (KBr): 3360, 3184, 3057, 2956, 2921, 2850, 1736, 1648, 1602, 1455, 1438, 1378, 1265, 1160, 1117, 1004, 860, 749, 700, 558, 526 cm<sup>-1</sup>. **HR-ESI-MS**: calculated *m/z* [M+H]<sup>+</sup> for [C<sub>23</sub>H<sub>25</sub>NO<sub>3</sub>P]<sup>+</sup>: 394.1572, found: 394.1562.

#### (2-(allyloxy)phenyl)(dimethylamino)methyl)diphenylphosphine oxide (5a)

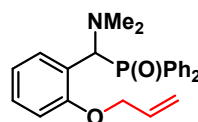

Purification via silica gel column chromatography (petroleum ether/ethyl acetate = 1/1, v/v)

White solid, m. p.: 105-106 °C.

72.0 mg, 92% yield.

**<sup>1</sup>H NMR** (400 MHz, CD<sub>3</sub>CN) δ 8.02-7.87 (m, 3H), 7.67-7.49 (m, 5H), 7.38-7.23 (m, 3H), 7.19 (t, *J* = 7.8 Hz, 1H), 6.96-6.82 (m, 2H), 6.25-6.06 (m, 1H), 5.51-5.38 (m, 2H), 5.32 (dd, *J* = 10.6, 1.5 Hz, 1H), 4.64-4.53 (m, 1H), 4.53-4.43 (m, 1H), 2.32 (d, *J* = 1.4 Hz, 6H). **<sup>13</sup>C NMR** (101 MHz, CD<sub>3</sub>CN) δ 158.2 (d, *J* = 8.8 Hz), 135.4 (d, *J* = 98.2 Hz), 134.8, 134.7 (d, *J* = 93.4 Hz), 133.4 (d, *J* = 3.9 Hz), 132.2 (d, *J* = 2.1 Hz), 132.2 (d, *J* = 2.1 Hz), 131.9 (d, *J* = 8.2 Hz), 131.2 (d, *J* = 8.4 Hz), 130.2, 129.5 (d, *J* = 11.4 Hz), 129.2 (d, *J* = 11.0 Hz), 120.6, 120.3 (d, *J* = 5.0 Hz), 117.6, 112.9, 69.9, 58.2 (d, *J* = 91.2 Hz), 44.2 (d, *J* = 8.0 Hz). **<sup>31</sup>P NMR** (162 MHz, CD<sub>3</sub>CN) δ 30.30. **IR** (KBr): 3055, 2924, 2857, 2828, 2784, 1598, 1486, 1451, 1437, 1263, 1237, 1190, 1155, 1116, 1105, 1024, 799, 750, 720, 699, 562, 543, 527 cm<sup>-1</sup>. **HR-ESI-MS**: calculated *m/z* [M+Na]<sup>+</sup> for [C<sub>24</sub>H<sub>26</sub>NO<sub>2</sub>PNa]<sup>+</sup>: 414.1599, found: 414.1589.

#### 2-((dimethylamino)(diphenylphosphoryl)methyl)phenyl benzoate (5b)

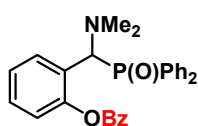

Purification via silica gel column chromatography (petroleum ether/ethyl acetate = 1/1, v/v)

White solid, m. p.: 181-182 °C.

86.5 mg, 95% yield.

**<sup>1</sup>H NMR** (400 MHz, CDCl<sub>3</sub>) δ 8.17 (dd, *J* = 14.6, 7.6 Hz, 3H), 7.89 (dd, *J* = 9.6, 8.2 Hz, 2H), 7.68 (t, *J* = 7.4 Hz, 1H), 7.60-7.38 (m, 8H), 7.28 (ddd, *J* = 17.0, 13.8, 7.4 Hz, 5H), 7.08 (d, *J* = 7.8 Hz, 1H), 4.88 (d, *J* = 10.9 Hz, 1H), 2.40 (s, 6H). **<sup>13</sup>C NMR** (101 MHz, CDCl<sub>3</sub>) δ 164.4, 149.8 (d, *J* = 9.1 Hz), 134.0, 133.0 (d, *J* = 99.9 Hz), 132.9 (d, *J* = 3.8 Hz), 132.4, 132.2 (d, *J* = 95.5 Hz), 131.6, 131.5 (d, *J* = 8.9 Hz), 131.4, 131.0 (d, *J* = 8.7 Hz), 130.0, 129.3, 129.0, 128.9, 128.4 (d, *J* = 11.3 Hz), 128.2, 128.2 (d, *J* = 11.5 Hz), 125.4, 123.4 (d, *J* = 4.1 Hz), 122.4, 60.2 (d, *J* = 89.3 Hz), 44.0 (d, *J* = 7.5 Hz). **<sup>31</sup>P NMR** (162 MHz, CDCl<sub>3</sub>) δ 31.33. **IR** (KBr): 3059, 2934, 2867, 2831, 2787, 1739, 1601, 1485, 1451, 1438, 1374, 1262, 1201, 1175, 1117, 1090,

1059, 1024, 849, 754, 733, 700, 558, 546, 523, 507  $\text{cm}^{-1}$ . **HR-ESI-MS**: calculated  $m/z$   $[\text{M}+\text{H}]^+$  for  $[\text{C}_{28}\text{H}_{27}\text{NO}_3\text{P}]^+$ : 456.1729, found: 456.1721.

### 2-((dimethylamino)(diphenylphosphoryl)methyl)phenyl 4-methylbenzenesulfonate (5c)

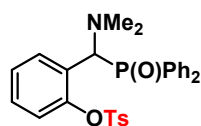

Purification via silica gel column chromatography (petroleum ether/ethyl acetate = 1/1, v/v)

Colorless oil

61.6 mg, 61% yield.

**$^1\text{H}$  NMR** (400 MHz,  $\text{CDCl}_3$ )  $\delta$  8.16 (d,  $J = 7.4$  Hz, 1H), 8.02-7.94 (m, 2H), 7.74 (d,  $J = 8.0$  Hz, 2H), 7.66-7.58 (m, 2H), 7.58-7.46 (m, 4H), 7.35 (d,  $J = 8.0$  Hz, 2H), 7.30 (d,  $J = 7.1$  Hz, 1H), 7.23 (d,  $J = 6.9$  Hz, 1H), 7.17 (t,  $J = 7.5$  Hz, 1H), 7.14-7.07 (m, 1H), 6.77 (d,  $J = 8.1$  Hz, 1H), 5.09 (d,  $J = 9.7$  Hz, 1H), 2.48 (s, 3H), 2.34 (s, 6H).  **$^{13}\text{C}$  NMR** (101 MHz,  $\text{CDCl}_3$ )  $\delta$  149.3 (d,  $J = 10.0$  Hz), 145.8, 133.6, 133.5 (d,  $J = 4.5$  Hz), 131.6 (d,  $J = 2.0$  Hz), 131.5, 131.4 (d,  $J = 19.4$  Hz), 131.3 (d,  $J = 2.4$  Hz), 131.2, 130.1, 129.2, 128.9 (d,  $J = 5.2$  Hz), 128.8 (d,  $J = 5.1$  Hz), 128.6 (d,  $J = 11.5$  Hz), 128.2, 128.1 (d,  $J = 11.6$  Hz), 126.4, 125.7 (d,  $J = 4.6$  Hz), 121.3, 60.5 (d,  $J = 89.5$  Hz), 44.3 (d,  $J = 7.2$  Hz), 21.9.  **$^{31}\text{P}$  NMR** (162 MHz,  $\text{CDCl}_3$ )  $\delta$  31.43. **IR** (KBr): 3658, 3631, 3057, 2928, 2865, 2830, 2785, 1597, 1482, 1438, 1371, 1195, 1178, 1158, 1116, 1079, 1028, 874, 848, 775, 723, 698, 662, 556, 543, 519  $\text{cm}^{-1}$ . **HR-ESI-MS**: calculated  $m/z$   $[\text{M}+\text{H}]^+$  for  $[\text{C}_{28}\text{H}_{29}\text{NO}_4\text{PS}]^+$ : 506.1555, found: 506.1547.

### 2-((dimethylamino)(diphenylphosphoryl)methyl)phenyl 1H-imidazole-1-sulfonate (5d)

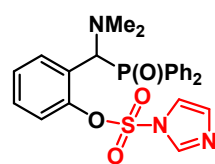

Purification via silica gel column chromatography (petroleum ether/ethyl acetate = 1/2, v/v)

Colorless oil

61.3 mg, 85% yield.

**$^1\text{H}$  NMR** (400 MHz,  $\text{CDCl}_3$ )  $\delta$  8.31 (d,  $J = 7.8$  Hz, 1H), 7.98 (ddd,  $J = 10.7, 7.5, 1.7$  Hz, 2H), 7.67 (s, 1H), 7.55 (td,  $J = 11.4, 6.9$  Hz, 5H), 7.30 (dd,  $J = 12.8, 6.3$  Hz, 2H), 7.25-7.19 (m, 3H), 7.19-7.10 (m, 2H), 6.38 (d,  $J = 8.2$  Hz, 1H), 4.88 (d,  $J = 9.8$  Hz, 1H), 2.34 (s, 6H).  **$^{13}\text{C}$  NMR** (101 MHz,  $\text{CDCl}_3$ )  $\delta$  148.8 (d,  $J = 9.7$  Hz), 137.4, 134.1 (d,  $J = 4.1$  Hz), 132.5 (d,  $J = 101.0$  Hz), 132.4, 131.9 (d,  $J = 2.6$  Hz), 131.8, 131.5 (d,  $J = 3.4$  Hz), 131.5, 131.4, 129.9, 128.7 (d,  $J = 11.5$  Hz), 128.1 (d,  $J = 11.4$  Hz), 127.9, 125.7 (d,  $J = 4.8$  Hz), 119.8, 118.2, 60.6 (d,  $J = 88.3$  Hz), 44.1 (d,  $J = 7.1$  Hz).  **$^{31}\text{P}$  NMR** (162 MHz,  $\text{CDCl}_3$ )  $\delta$  31.29. **IR** (KBr): 3518, 3460, 3439, 3401, 2922, 2852, 2831, 2787, 1660, 1645, 1634, 1483, 1437, 1424, 1260, 1207, 1144, 1049, 899, 852, 782, 726, 699, 616, 550, 517  $\text{cm}^{-1}$ . **HR-ESI-MS**: calculated  $m/z$   $[\text{M}+\text{H}]^+$  for  $[\text{C}_{24}\text{H}_{25}\text{N}_3\text{O}_4\text{PS}]^+$ : 482.1303, found: 482.1292.

### 2-((diphenylphosphanyl)methyl)phenol borane adduct 6

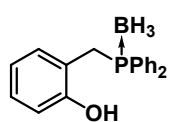

Purification via silica gel column chromatography (petroleum ether/ethyl acetate = 5/1, v/v)

White solid, m. p.: 118-119  $^{\circ}\text{C}$ .

16.0 mg, 21% yield.

**$^1\text{H}$  NMR** (400 MHz,  $\text{CDCl}_3$ )  $\delta$  7.66 (dd,  $J = 13.8, 5.0$  Hz, 4H), 7.56-7.48 (m, 2H), 7.47-7.38 (m, 4H), 7.09 (t,  $J = 7.6$  Hz, 1H), 6.87 (d,  $J = 8.0$  Hz, 1H), 6.71 (t,  $J = 7.4$  Hz, 1H), 6.65 (d,  $J = 7.5$  Hz, 1H), 5.48 (s, 1H), 3.67 (d,  $J = 12.0$  Hz, 2H), 1.14 (dd,  $J = 269.2, 121.1$  Hz, 3H).  **$^{13}\text{C}$  NMR** (101 MHz,  $\text{CDCl}_3$ )  $\delta$  154.3 (d,  $J = 4.3$  Hz), 132.7 (d,  $J = 8.9$  Hz), 131.7 (d,  $J = 4.3$  Hz), 131.6 (d,  $J = 2.1$  Hz), 128.9 (d,  $J = 9.9$  Hz), 128.7 (d,  $J = 3.1$  Hz), 128.4 (d,  $J = 55.2$  Hz),



121.4 (d,  $J = 2.3$  Hz), 120.4 (d,  $J = 4.5$  Hz), 118.4 (d,  $J = 2.3$  Hz), 28.4 (d,  $J = 33.9$  Hz).  $^{31}\text{P}$  NMR (162 MHz,  $\text{CDCl}_3$ )  $\delta$  17.28 (d,  $J = 73.4$  Hz).  $^{11}\text{B}$  NMR (128 MHz,  $\text{CDCl}_3$ )  $\delta$  -39.16 (dd,  $J = 85.2, 65.0$  Hz). IR (KBr): 3524, 3485, 3460, 3433, 3366, 2961, 2923, 2849, 2386, 1651, 1595, 1455, 1436, 1384, 1262, 1108, 1059, 866, 750, 692, 591, 502  $\text{cm}^{-1}$ . HR-ESI-MS: calculated  $m/z$   $[\text{M}+\text{Na}]^+$  for  $[\text{C}_{19}\text{H}_{20}\text{BOPNa}]^+$ : 329.1243, found: 329.1242.

## 2-((dimethylamino)methyl)phenol borane adduct 7

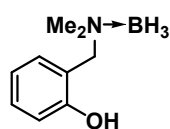

Purification via silica gel column chromatography (petroleum ether/ethyl acetate = 5/1, v/v)

Colorless oil

26.8 mg, 65% yield.

$^1\text{H}$  NMR (400 MHz,  $\text{CDCl}_3$ )  $\delta$  7.34-7.27 (m, 1H), 7.15 (d,  $J = 7.5$  Hz, 1H), 7.01-6.89 (m, 2H), 3.91 (s, 2H), 2.64 (s, 6H), 1.76 (dd,  $J = 171.9, 81.6$  Hz, 3H).  $^{13}\text{C}$  NMR (101 MHz,  $\text{CDCl}_3$ )  $\delta$  156.4, 134.0, 131.2, 120.8, 119.6, 118.5, 63.7, 51.6.  $^{11}\text{B}$  NMR (128 MHz,  $\text{CDCl}_3$ )  $\delta$  -10.30 (dd,  $J = 188.4, 93.1$  Hz). IR (KBr): 3594, 3527, 3481, 3437, 3330, 2954, 2925, 2869, 2854, 2380, 2319, 2269, 1651, 1610, 1457, 1378, 1288, 1260, 1165, 1111, 1017, 936, 872, 818, 757, 696  $\text{cm}^{-1}$ . HR-ESI-MS: calculated  $m/z$   $[\text{M}-\text{H}]^+$  for  $[\text{C}_9\text{H}_{15}\text{BNO}]^+$ : 164.1247, found: 164.1240.

## 5. Gram-scale syntheses and transformations of 4aa.

### 5.1 Gram-scale reaction

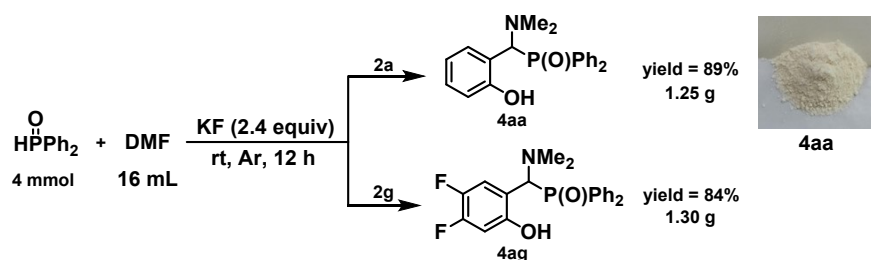

To an oven-dried flask (50 mL) equipped with a magnetic stir bar was charged successively with diphenylphosphine oxide **1a** (808.8 mg, 4.0 mmol), KF (557.8 mg, 9.6 mmol), and anhydrous DMF (16 mL) in a glove box. The aryne precursor **2** (4.8 mmol) was added to the above mixture. The reaction mixture was allowed to stir at room temperature for 12 h. After the reaction, DMF was distilled under reduced pressure. Then, 30 mL dichloromethane was added to the flask and stir for 5 minutes, and the mixture was filtered through a celite pale to remove the precipitates. The reaction mixture was concentrated and purified by silica gel column chromatography (petroleum ether/EtOAc = 1:2) to afford the desired product **4aa** and **4ag** as white solid.

### 5.2 Synthesis of ((2-(allyloxy)phenyl)(dimethylamino)methyl)diphenylphosphine oxide

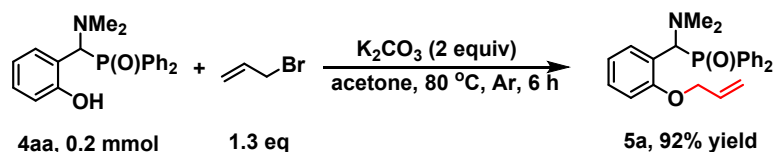

To a 25 mL Schlenk tube was charged with **4aa** (0.2 mmol, 70.3 mg), acetone (1 mL),  $\text{K}_2\text{CO}_3$  (55.3 mg, 2 equiv), and allyl bromide (23  $\mu\text{L}$ , 1.3 equiv) successively under Ar

atmosphere. After the Schlenk tube was sealed, the resulting mixture was refluxed for 6 h. After the reaction completed, the acetone was removed under reduced pressure. The residue was purified by column chromatography on silica gel (petroleum ether/ethyl acetate = 1:1, v/v) to give compound **5a** as white solid (72.0 mg, 92% yield).

### 5.3 Synthesis of 2-((dimethylamino)(diphenylphosphoryl)methyl)phenyl benzoate

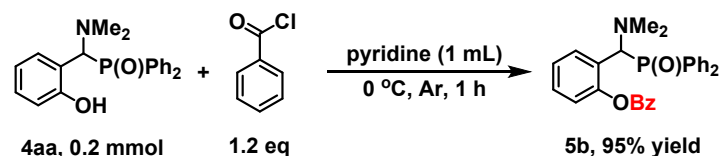

To a solution of **4aa** (0.2 mmol, 70.3 mg) in pyridine (1 mL) cooled in an ice bath was added benzoyl chloride (27.9  $\mu$ L, 1.2 equiv) dropwise over 3 minutes with stirring. Subsequently, the reaction mixture was kept under stirring for 1 h. After the reaction completed, 5 mL dichloromethane was added to the flask and washed with a solution of 1M HCl (1 mL). The organic phase was dried over anhydrous  $\text{Na}_2\text{SO}_4$ , filtrated and concentrated in vacuo. The residue was purified by column chromatography on silica gel (petroleum ether/ethyl acetate = 1:1, v/v) to give compound **5b** as white solid (86.5 mg, 95% yield).

### 5.4 Synthesis of 2-((dimethylamino)(diphenylphosphoryl)methyl)phenyl 4-methylbenzenesulfonate

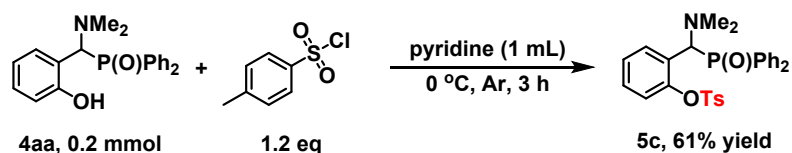

A solution of **4aa** (0.2 mmol, 70.3 mg), *p*-toluenesulfonyl chloride (45.8 mg, 1.2 equiv), and pyridine (1 mL) was stirred at 0 °C for 3 h. After the reaction, water (5 mL) was added and the reaction mixture was extracted with  $\text{CH}_2\text{Cl}_2$  (2 $\times$ 10 mL). The organic layers were combined, dried over anhydrous  $\text{Na}_2\text{SO}_4$ , concentrated under reduced pressure, and purified by column chromatography on silica gel (petroleum ether/ethyl acetate = 1:1) to give compound **5c** as colorless oil (61.6 mg, 61% yield).

### 5.5 Synthesis of 2-((dimethylamino)(diphenylphosphoryl)methyl)phenyl 1*H*-imidazole-1-sulfonate

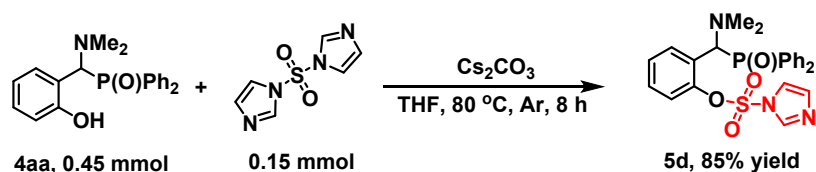

A solution of *N,N'*-sulfonyldiimidazole (0.15 mmol, 29.8 mg), **4aa** (0.45 mmol, 158.1 mg) and  $\text{Cs}_2\text{CO}_3$  (48.9 mg, 1 equiv) in THF (1 mL) was stirred at 80 °C for 8 h. The mixture was cooled to room temperature and then filtered through a celite pale. After concentration of the filtrate, the sulfonate **5d** was purified by silica gel column chromatography (petroleum ether/ethyl acetate = 1:1) to give compound **5d** as colorless oil (61.3 mg, 85% yield). The yield reported here was based on *N,N'*-sulfonyldiimidazole.

## 5.6 Reduction of 4aa in the (EtO)<sub>3</sub>SiH/Ti(OBu)<sub>4</sub>/BH<sub>3</sub>·THF system

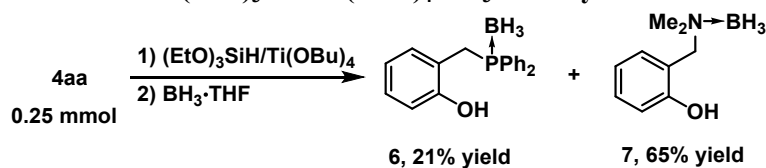

To a 25 mL Schlenk tube was charged with **4aa** (0.25 mmol, 87.8 mg), degassed toluene (5mL), (EtO)<sub>3</sub>SiH (1.5 mmol, 6.0 equiv, 277  $\mu$ L), and Ti(OBu)<sub>4</sub> (0.2 mmol, 0.8 equiv, 68  $\mu$ L) under Ar atmosphere. After the Schlenk tube was sealed, the resulting mixture was stirred at 120 °C for 30 min. After the reaction completed, the reaction was cooled to room temperature and BH<sub>3</sub> (0.75 mL 1 M in THF, 3.0 equiv) was added via syringe under Ar atmosphere. The resulting reaction mixture was stirred at room temperature for 1 h. The mixture was concentrated in vacuo, and the residue was purified by column chromatography on silica gel (petroleum ether/ethyl acetate = 5/1, v/v) to give compound **6** as white solid (16.0 mg, 21% yield), compound **7** as colorless oil (26.8 mg, 65% yield).

## 6. Mechanistic study

### 6.1 Radical trapping experiment

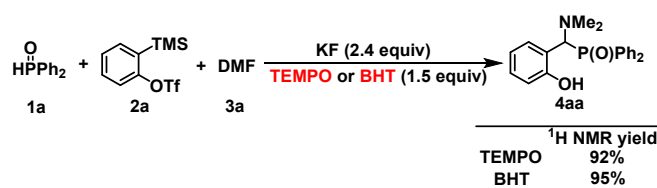

Scheme S1 Radical trapping experiments.

To a 10 mL Schlenk tube equipped with a magnetic stir bar was charged with diphenylphosphine oxide **1a** (50.6 mg, 0.25 mmol), KF (34.9 mg, 0.6 mmol), 2,2,6,6-Tetramethyl-1-piperdinyloxy (TEMPO) (58.6 mg, 0.375 mmol) and DMF (1 mL) in a glove box. The aryne precursor **2a** (0.3 mmol, 1.2 equiv) was added into the reaction mixture, then stirred at room temperature for 12 h. After the reaction, DMF was distilled under reduced pressure, and the yield was determined by <sup>1</sup>H NMR using 1,3,5-trimethoxybenzene as an internal standard.

Results: when adding 1.5 equiv of TEMPO into the reaction system, 92% <sup>1</sup>H NMR yield of **4aa** was produced; As for BHT, yield was 95%, both of which excluded the radical pathway of this transformation.

### 6.2 Deuterium experiments

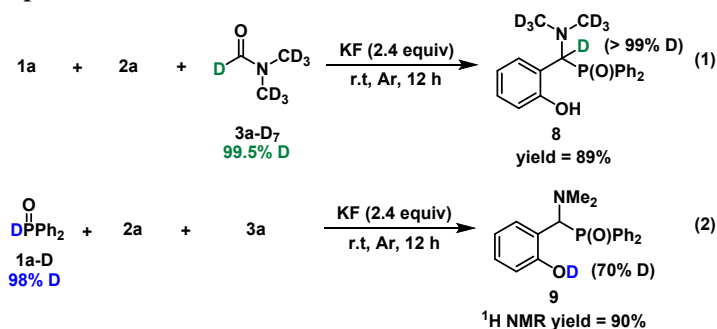

Scheme S2 Deuterium experiments with 3a-D<sub>7</sub> and 1a-D.

According to the general procedure, when **3a-D<sub>7</sub>** was subjected to the standard reaction conditions, affording the benzyl isotope labeled product **8** with 89% isolated yield, which proved the [2+2] cycloaddition process of benzyne with DMF.

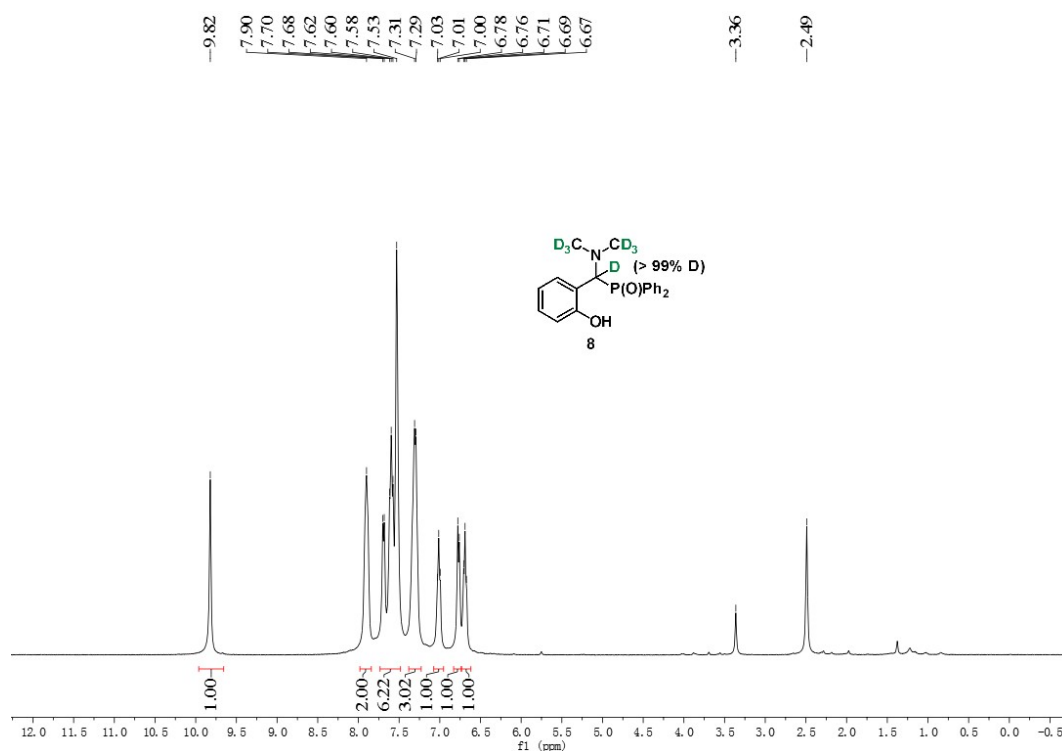

**Figure S1. The deuterium labeling experiment with 3a-D<sub>7</sub>.**

Furthermore, the reaction of deuterium-labeled phosphine oxide **1a-D** afforded **9** in 90% yield with 70% deuterium incorporation at the phenolic hydroxyl, which revealed the H-P(O) compound probably underwent 1,4-addition process in the multi-component reaction.

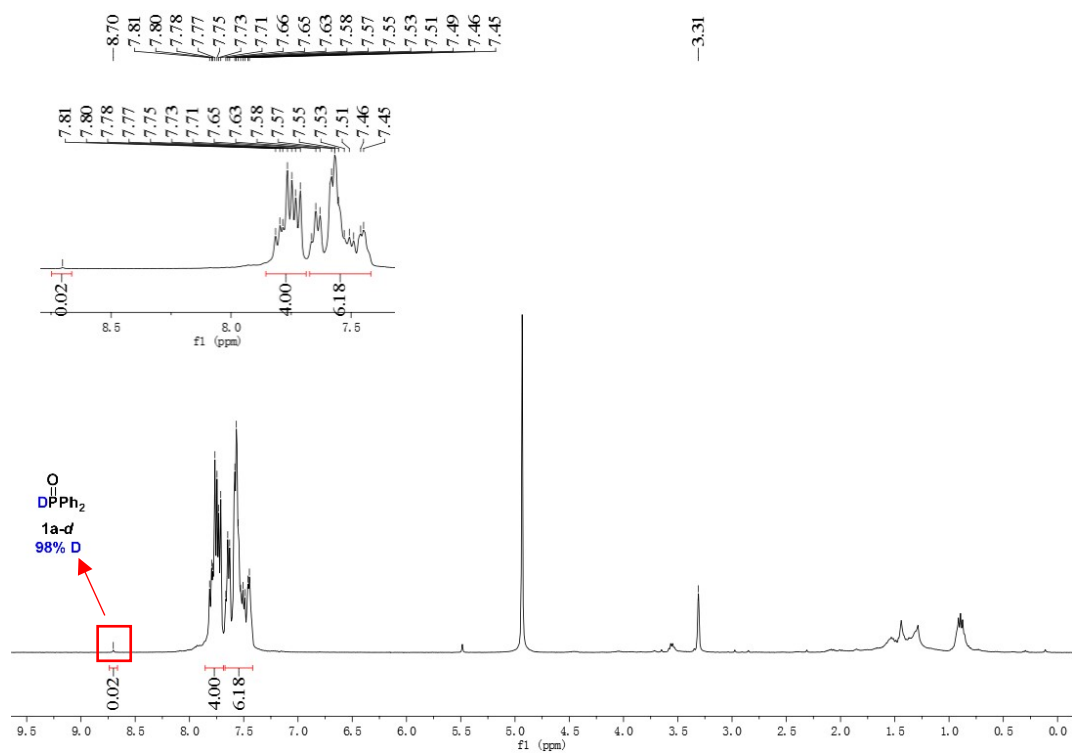

Figure S2.  $^1\text{H}$  NMR spectrum of 1a-D

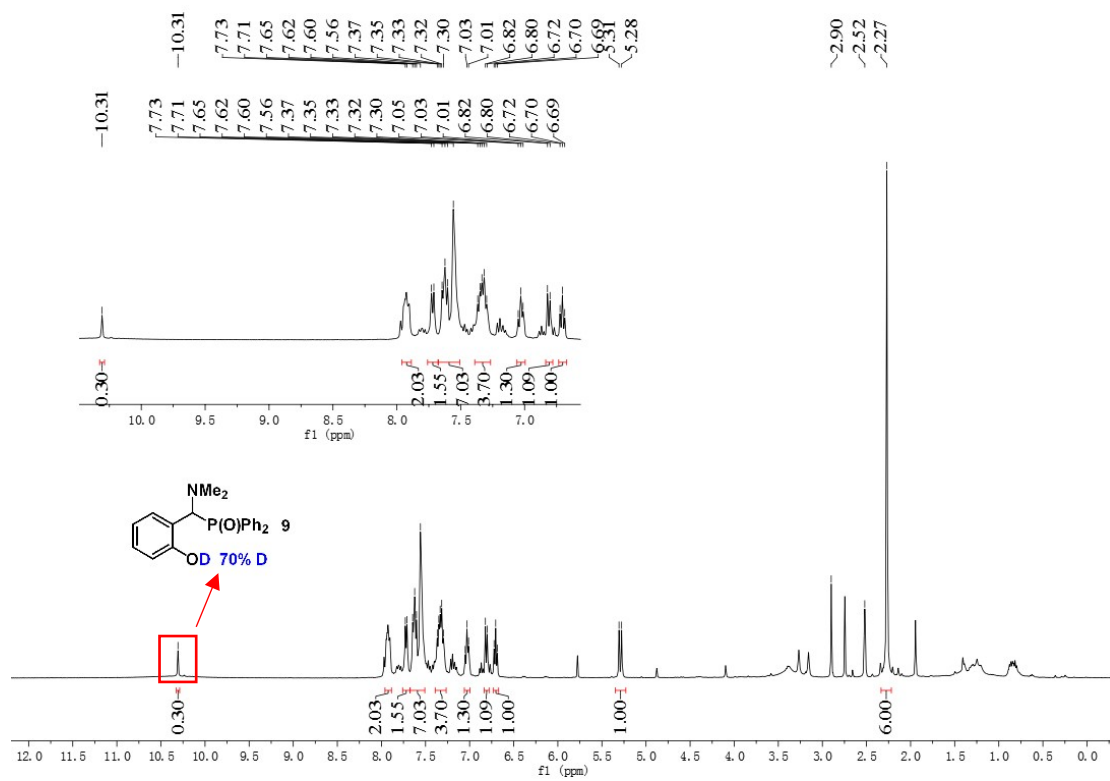

Figure S3. The deuterium labeling experiment of 1a-D, 2a and DMF

## 7. X-ray crystal structure

Recrystallization of the mixed products **4ae** and **4ae'** from hexane and ethyl acetate (v/v = 1:1) afforded **4ae** with high purity, second recrystallization of **4ae** from CDCl<sub>3</sub> afforded crystals suitable for X-ray diffraction analysis. The level set for thermal ellipsoids of all atoms is 50%.

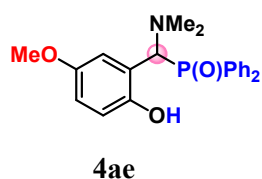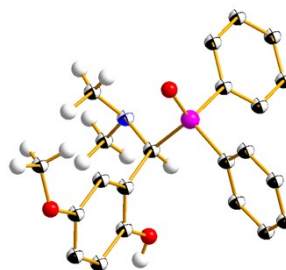

X-ray of **4ae**

Table S1 Crystal Data and Structure Refinement for **4ae**

| Identification code                  | <b>4ae</b>                                                   |
|--------------------------------------|--------------------------------------------------------------|
| Empirical formula                    | C <sub>22</sub> H <sub>24</sub> NO <sub>3</sub> P            |
| Formula weight                       | 381.39                                                       |
| Temperature/K                        | 113.15                                                       |
| Crystal system                       | monoclinic                                                   |
| Space group                          | P2 <sub>1</sub> /c                                           |
| a/Å                                  | 9.5354(3)                                                    |
| b/Å                                  | 13.7676(5)                                                   |
| c/Å                                  | 15.1853(4)                                                   |
| α/°                                  | 90                                                           |
| β/°                                  | 90.373(3)                                                    |
| γ/°                                  | 90                                                           |
| Volume/Å <sup>3</sup>                | 1993.48(11)                                                  |
| Z                                    | 4                                                            |
| ρ <sub>calc</sub> /g/cm <sup>3</sup> | 1.271                                                        |
| μ/mm <sup>-1</sup>                   | 0.160                                                        |
| F(000)                               | 808.0                                                        |
| Crystal size/mm <sup>3</sup>         | 0.26 × 0.18 × 0.16                                           |
| Radiation                            | MoKα (λ = 0.71073)                                           |
| 2θ range for data collection/°       | 3.994 to 57.392                                              |
| Index ranges                         | -12 ≤ h ≤ 12, -18 ≤ k ≤ 18, -20 ≤ l ≤ 20                     |
| Reflections collected                | 24933                                                        |
| Independent reflections              | 5152[R <sub>int</sub> = 0.0565, R <sub>sigma</sub> = 0.0392] |
| Data/restraints/parameters           | 5152/0/249                                                   |
| Goodness-of-fit on F <sup>2</sup>    | 1.041                                                        |

Final R indexes [ $I \geq 2\sigma(I)$ ]  $R_1 = 0.0415$ ,  $wR_2 = 0.0991$

Final R indexes [all data]  $R_1 = 0.0517$ ,  $wR_2 = 0.1055$

Largest diff. peak/hole /  $e \text{ \AA}^{-3}$  0.37/-0.32

---

## 8. References

- (1) Y.-C. Ou, Y.-T. Huang, Z.-L. He, G.-D. Yu, Y.-P. Huo, X.-W. Li, Y. Gao and Q. Chen. *Chem. Commun.*, 2020, **56**, 1357-1360.
- (2) X.-J. Li, Y. Sun, X. Huang, L. Zhang, L.-C. Kong and B. Peng, *Org. Lett.* 2017, **19**, 838-841.

## 9. $^1\text{H}$ NMR, $^{13}\text{C}$ NMR, $^{31}\text{P}$ NMR and $^{11}\text{B}$ NMR spectra of the products

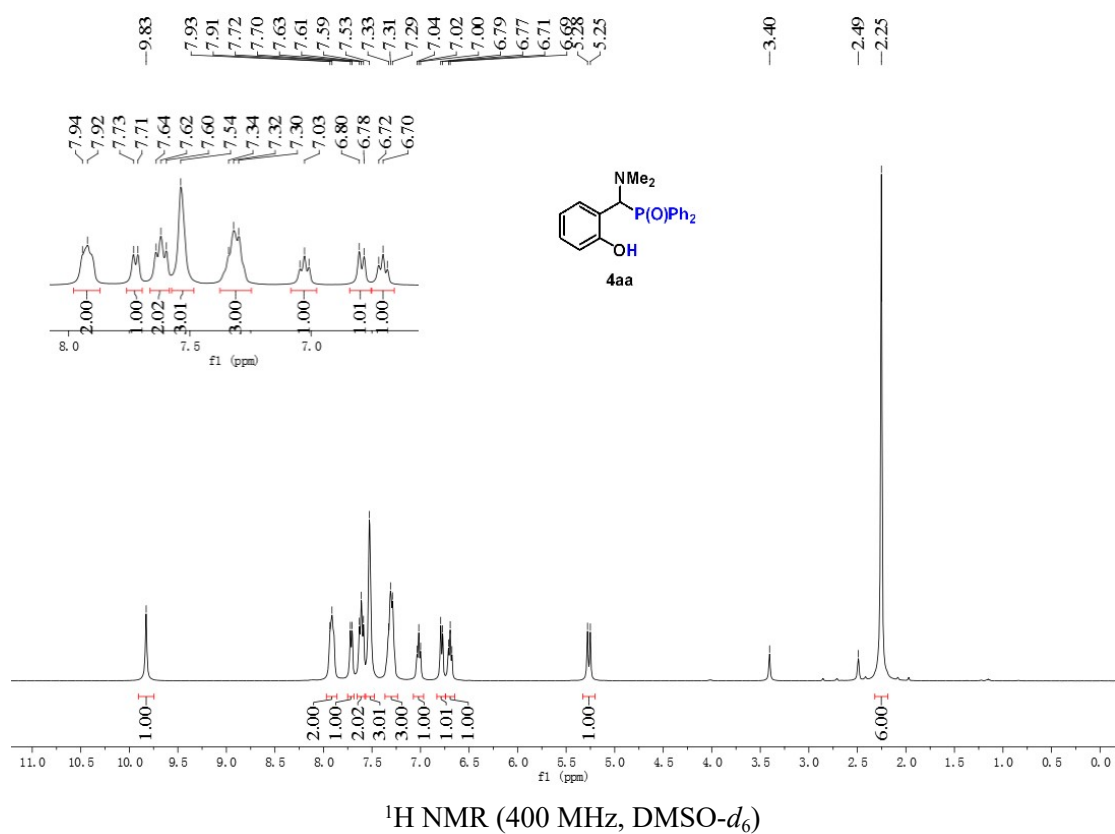

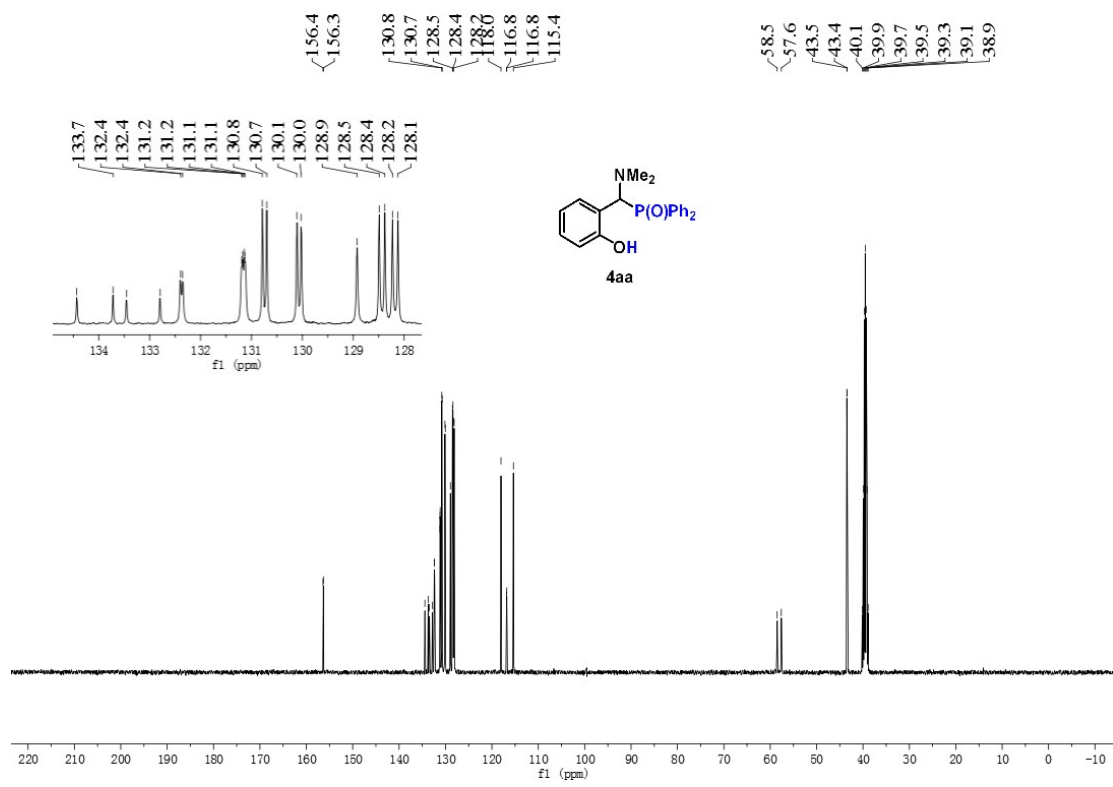

<sup>13</sup>C NMR (101 MHz, DMSO-*d*<sub>6</sub>)

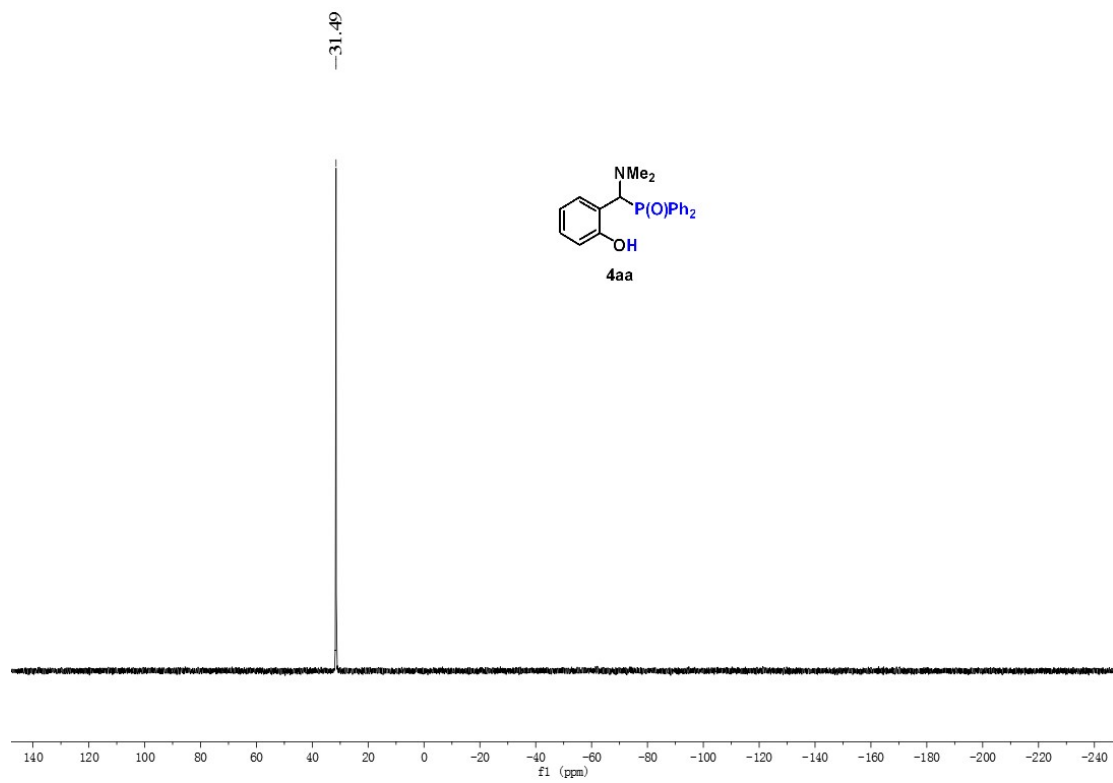

<sup>31</sup>P NMR (162 MHz, DMSO-*d*<sub>6</sub>)



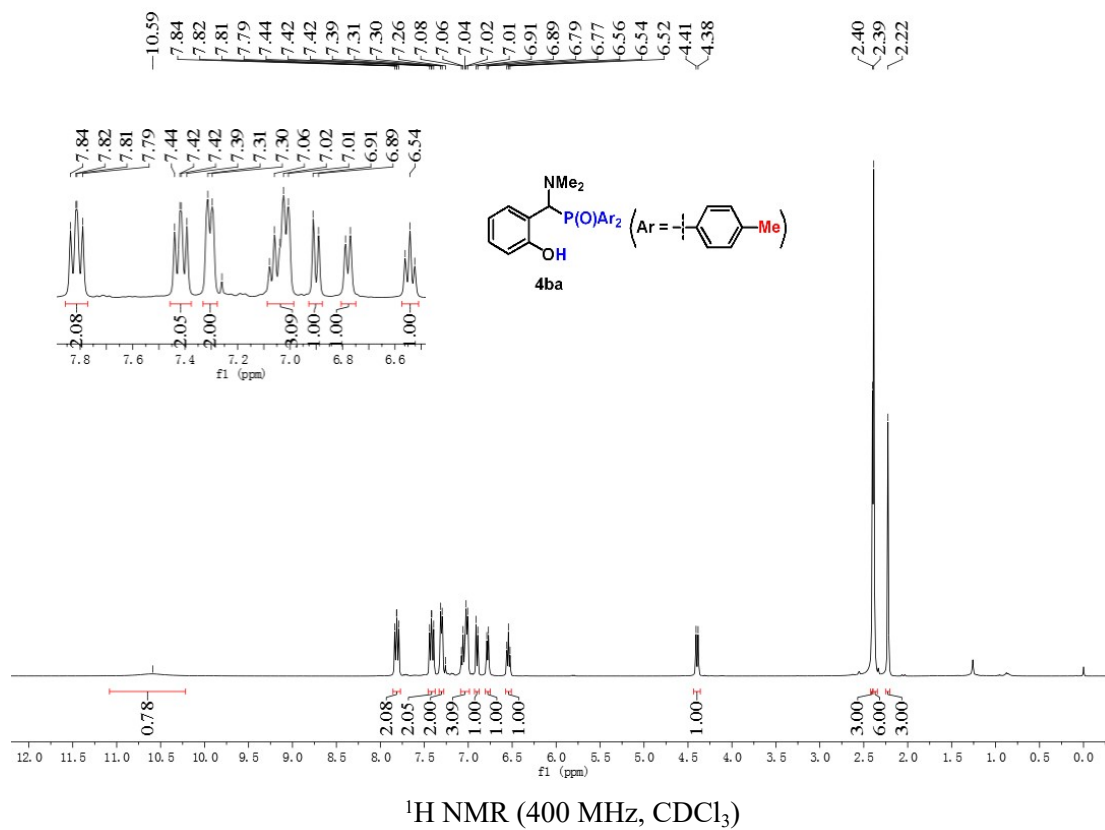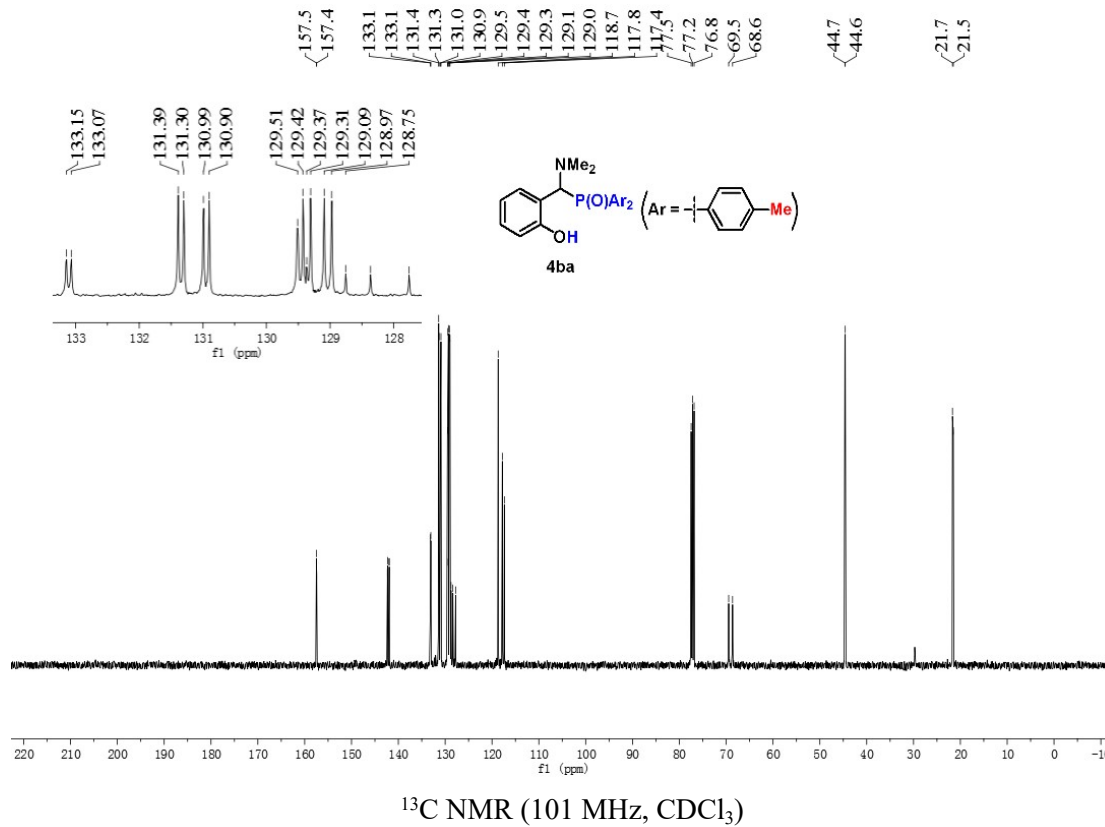

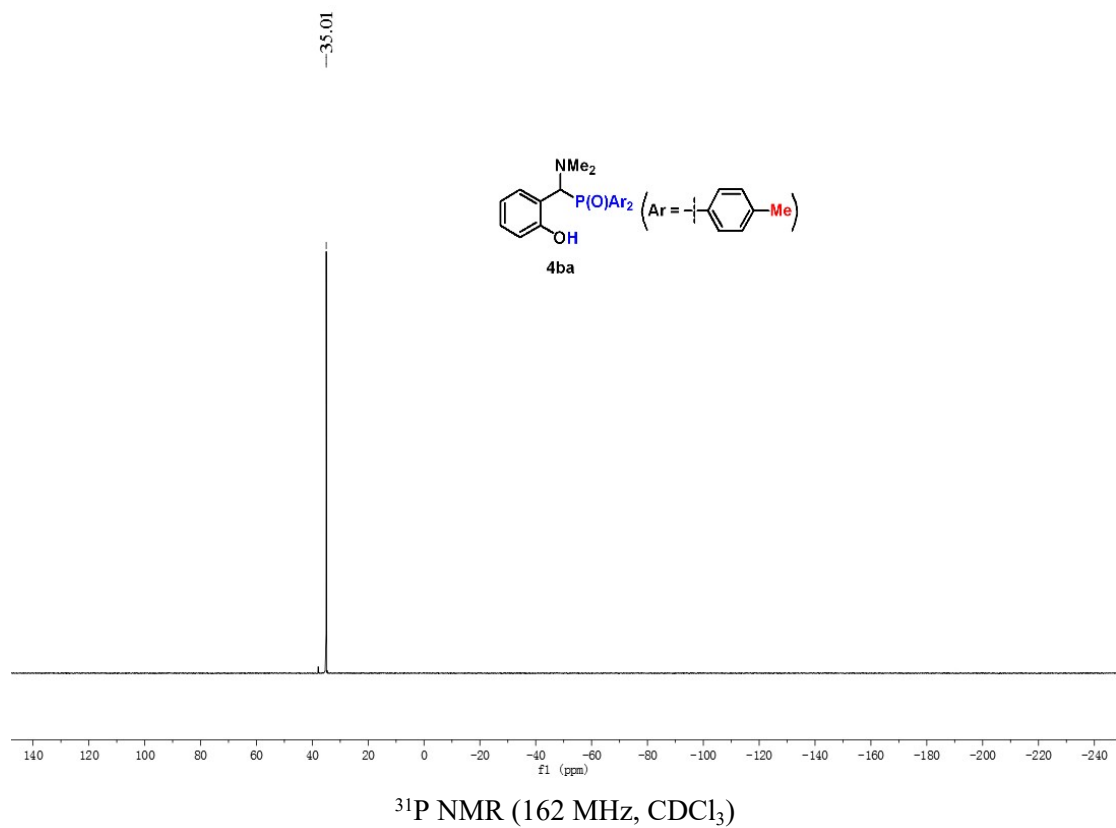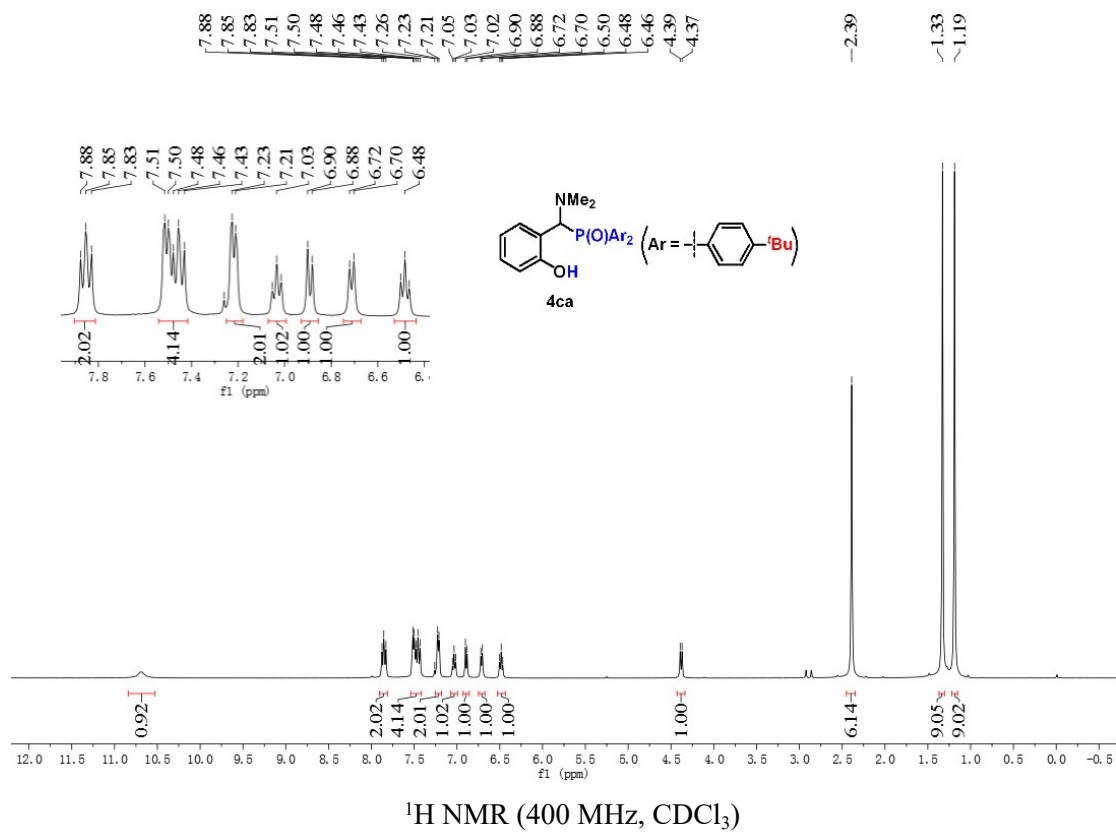

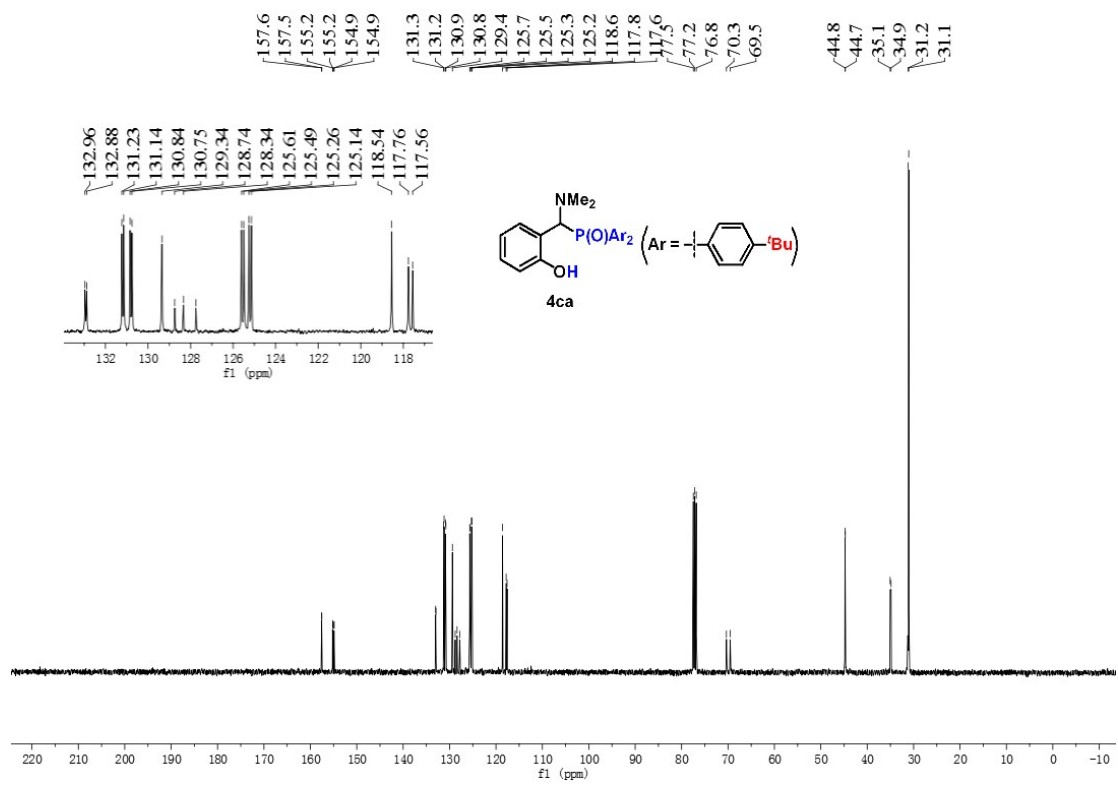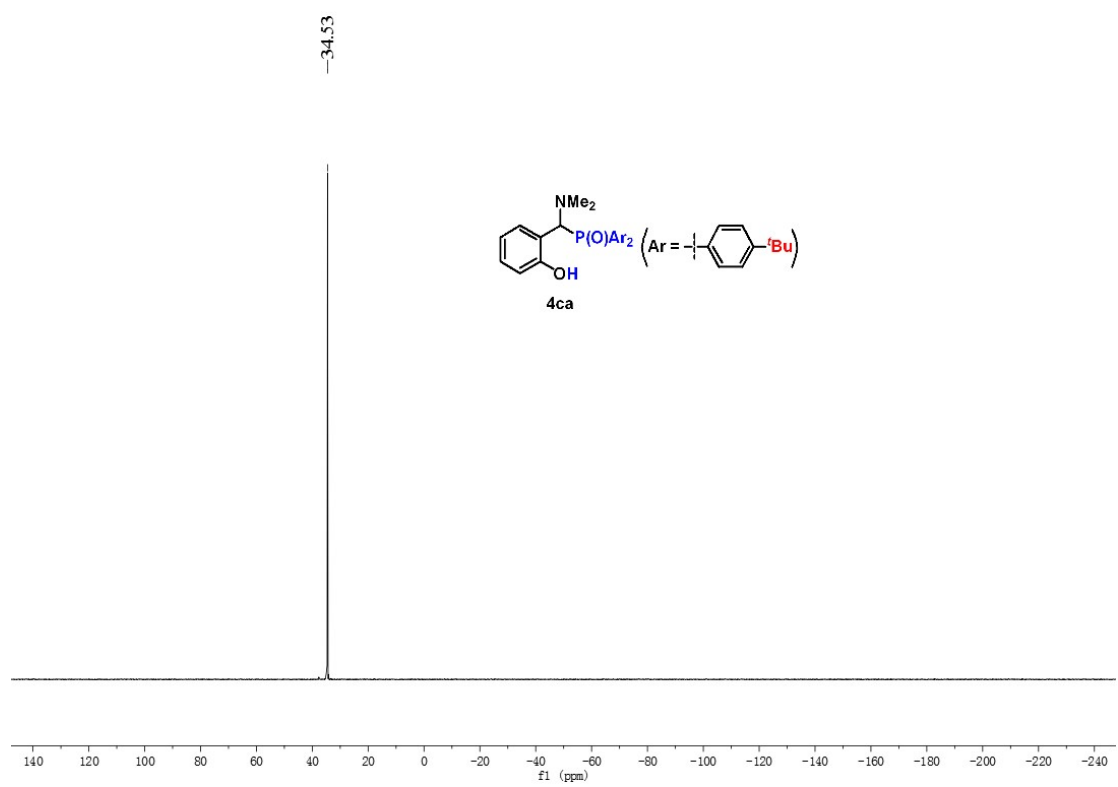

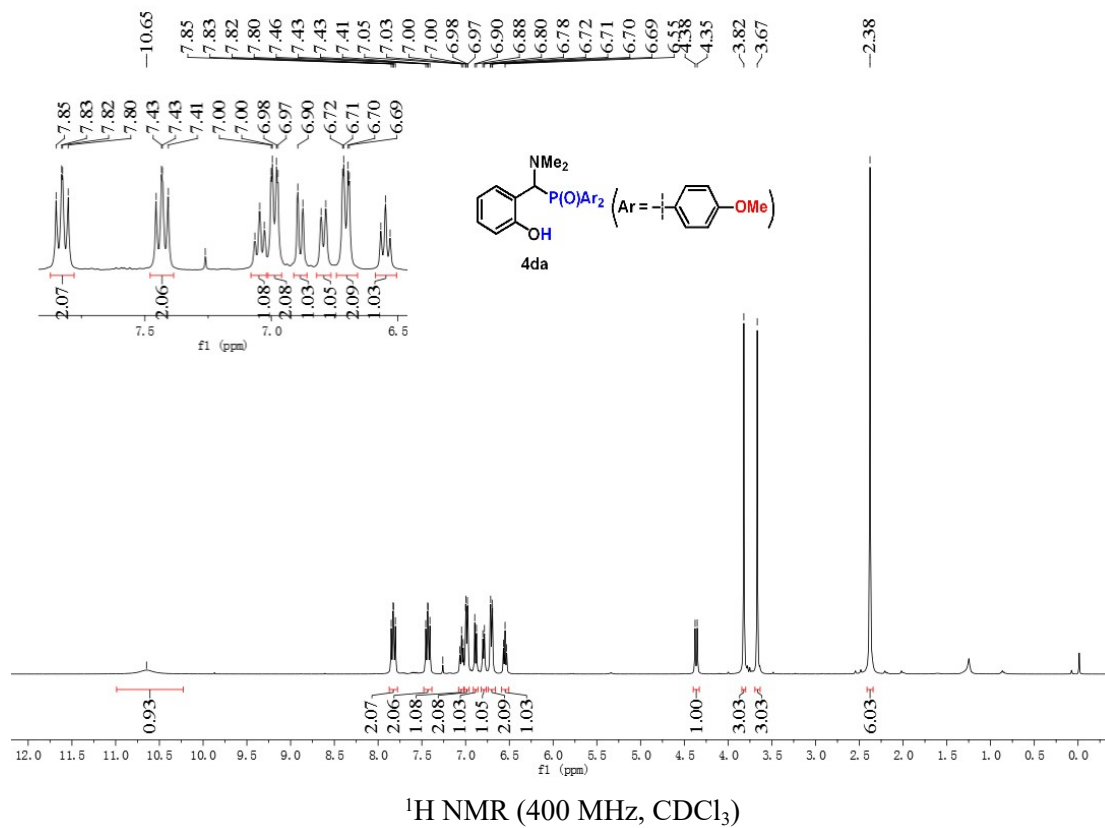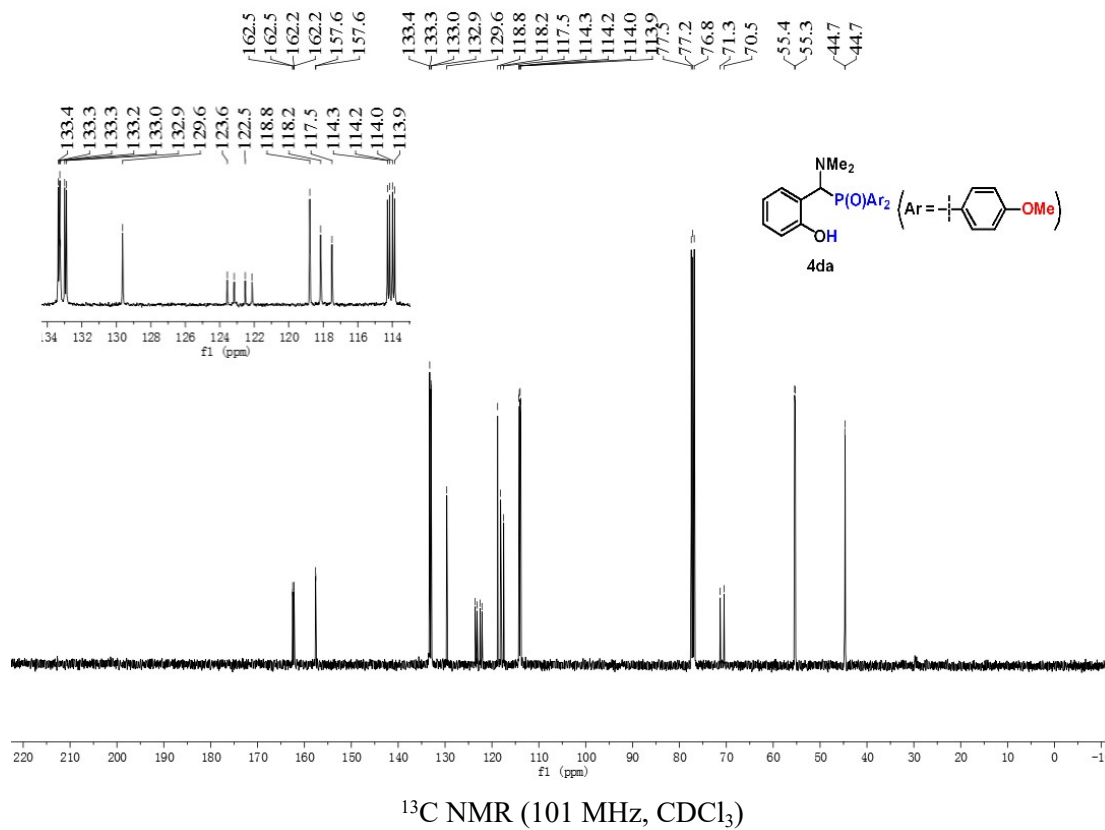

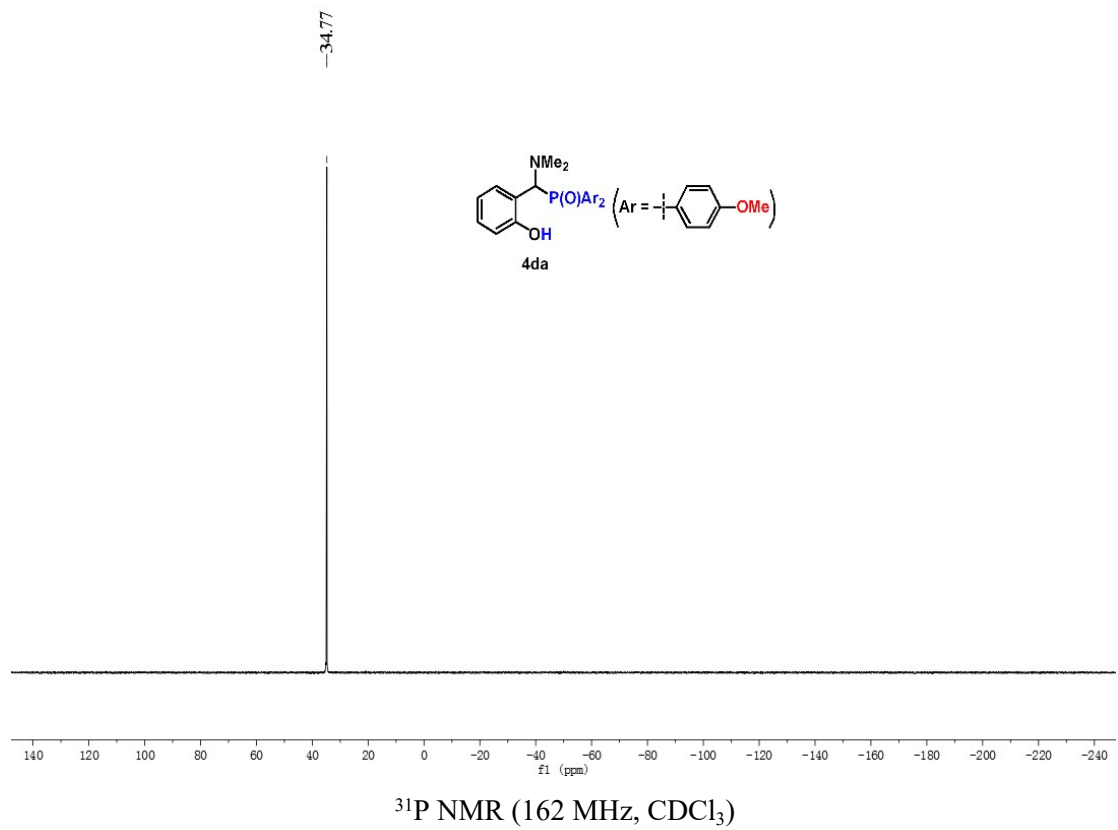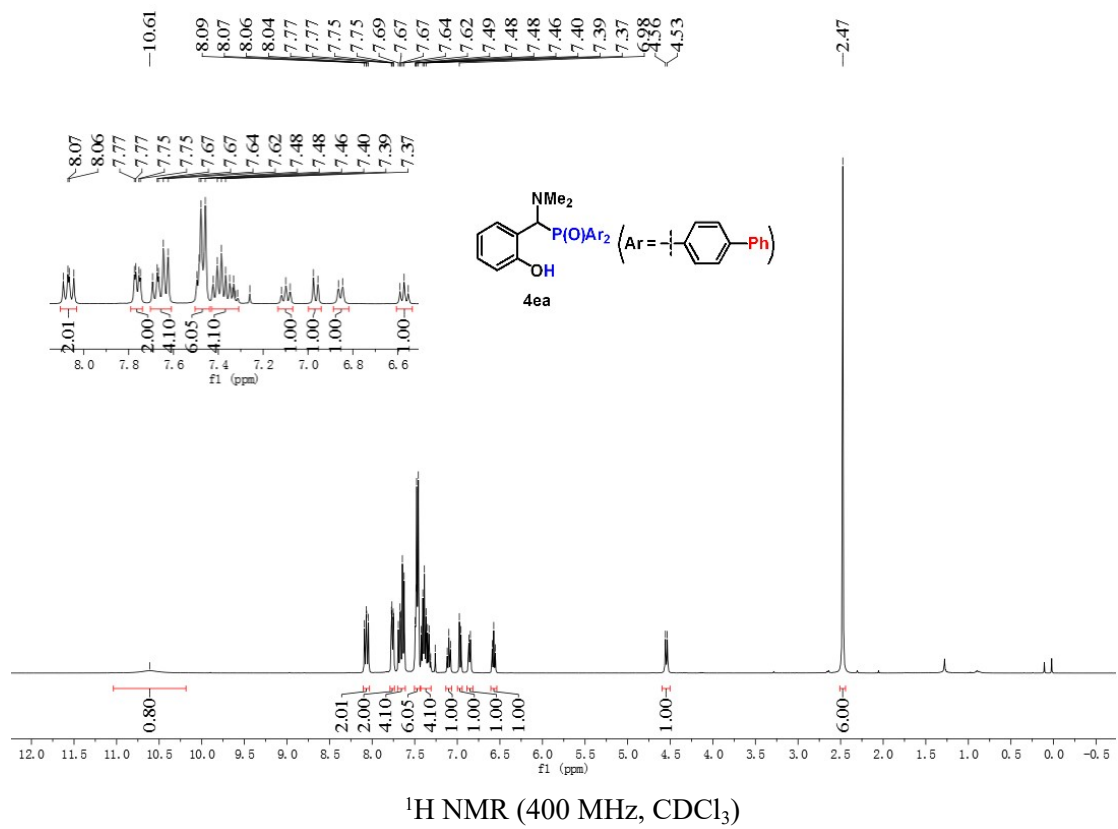

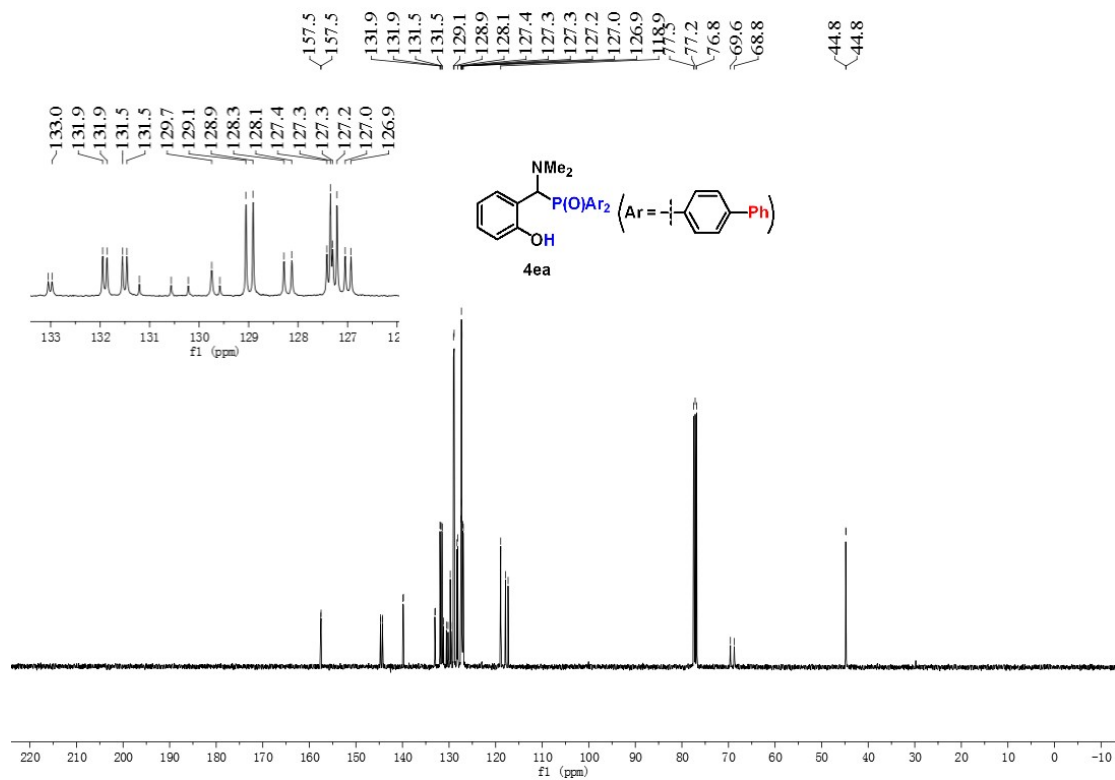

<sup>13</sup>C NMR (101 MHz, CDCl<sub>3</sub>)

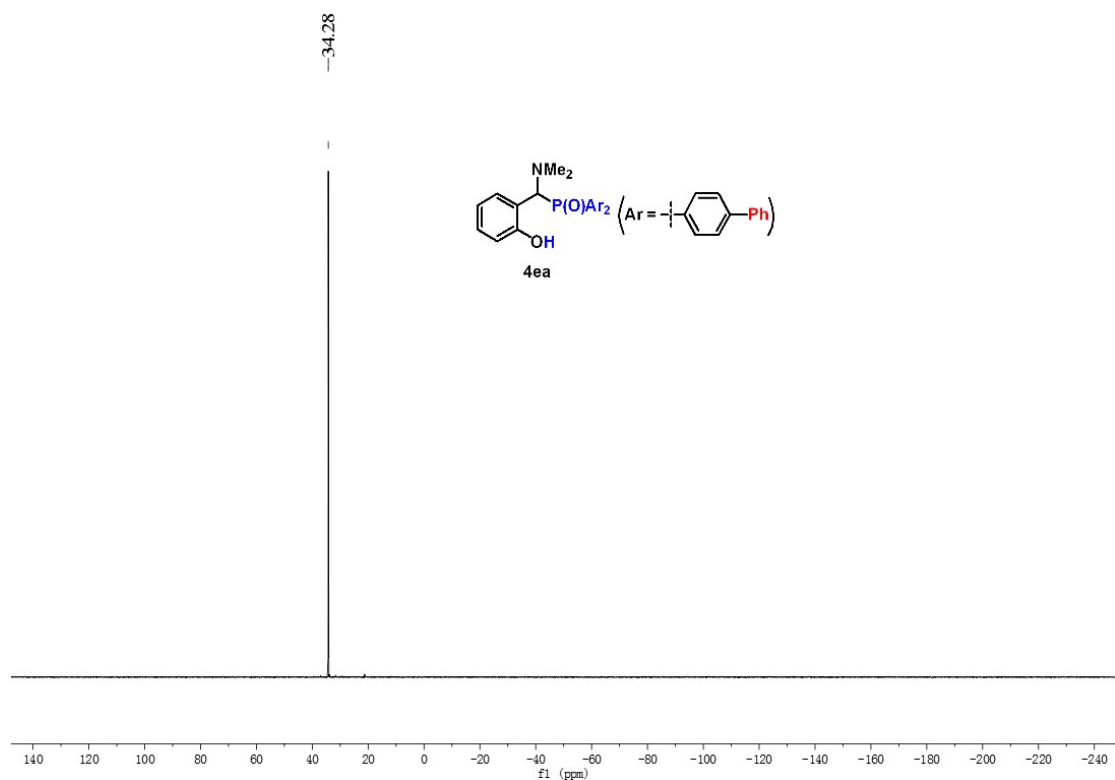

<sup>31</sup>P NMR (162 MHz, CDCl<sub>3</sub>)

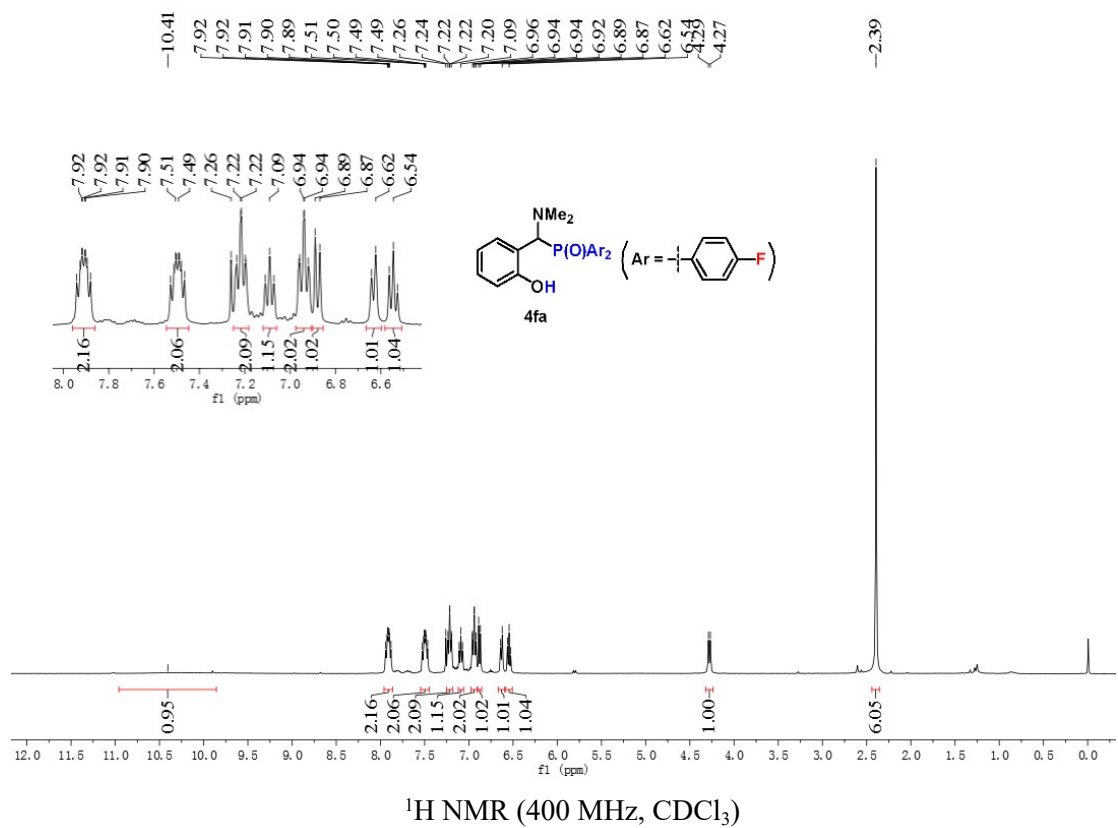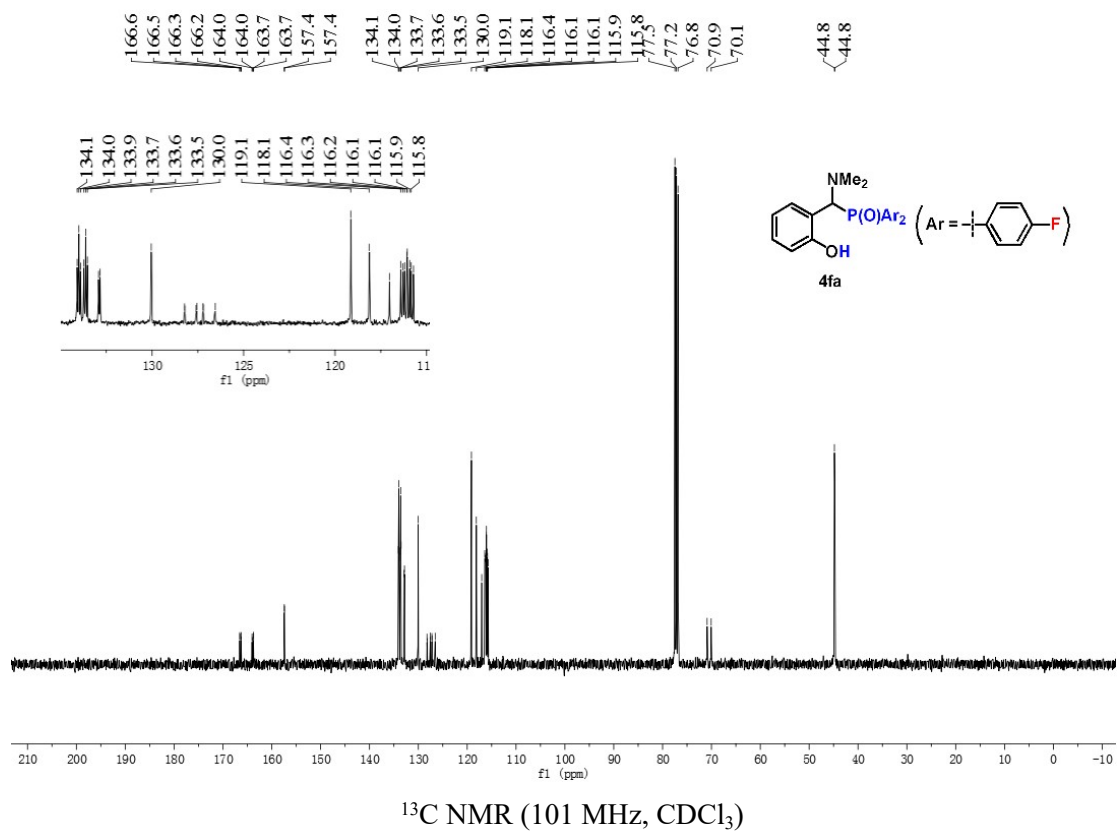

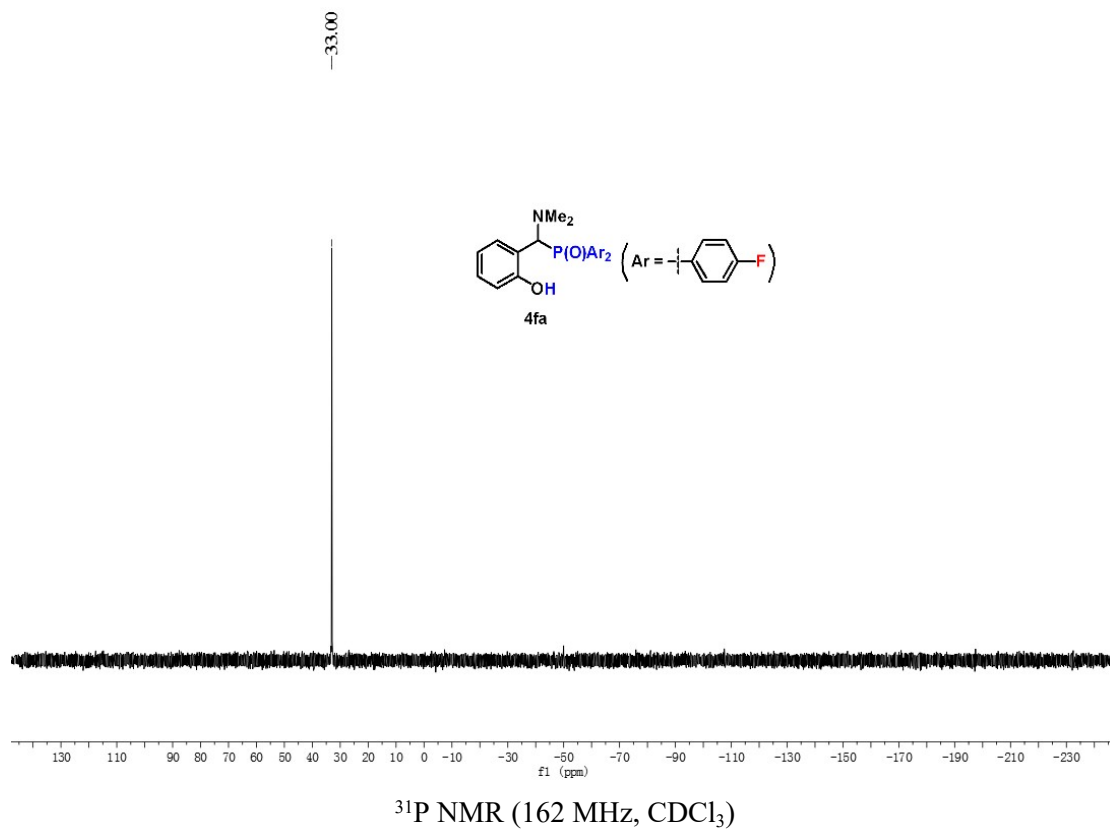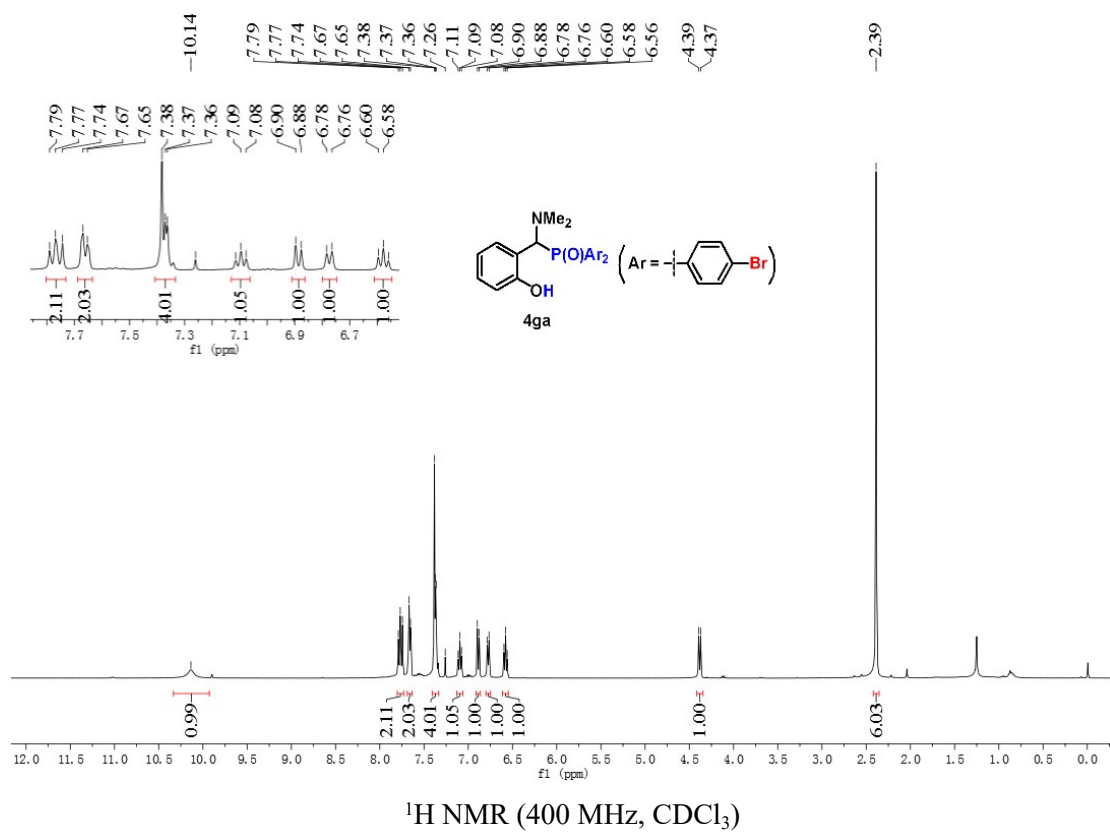



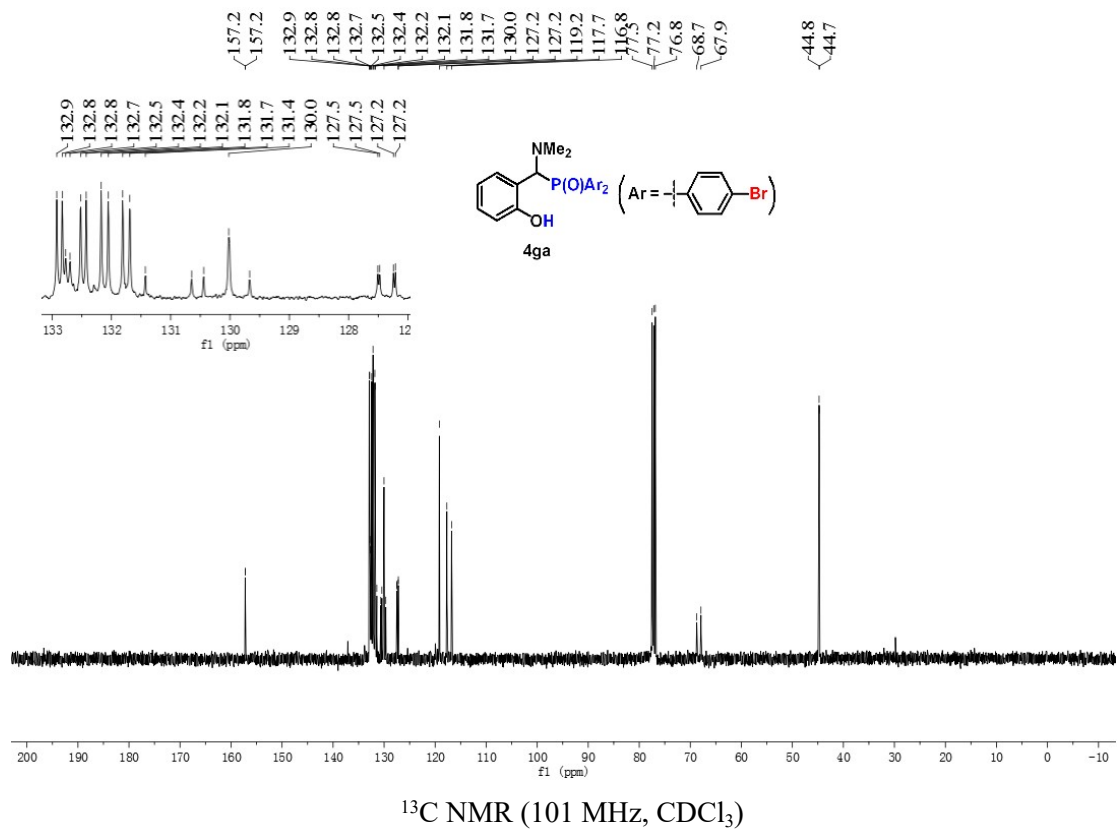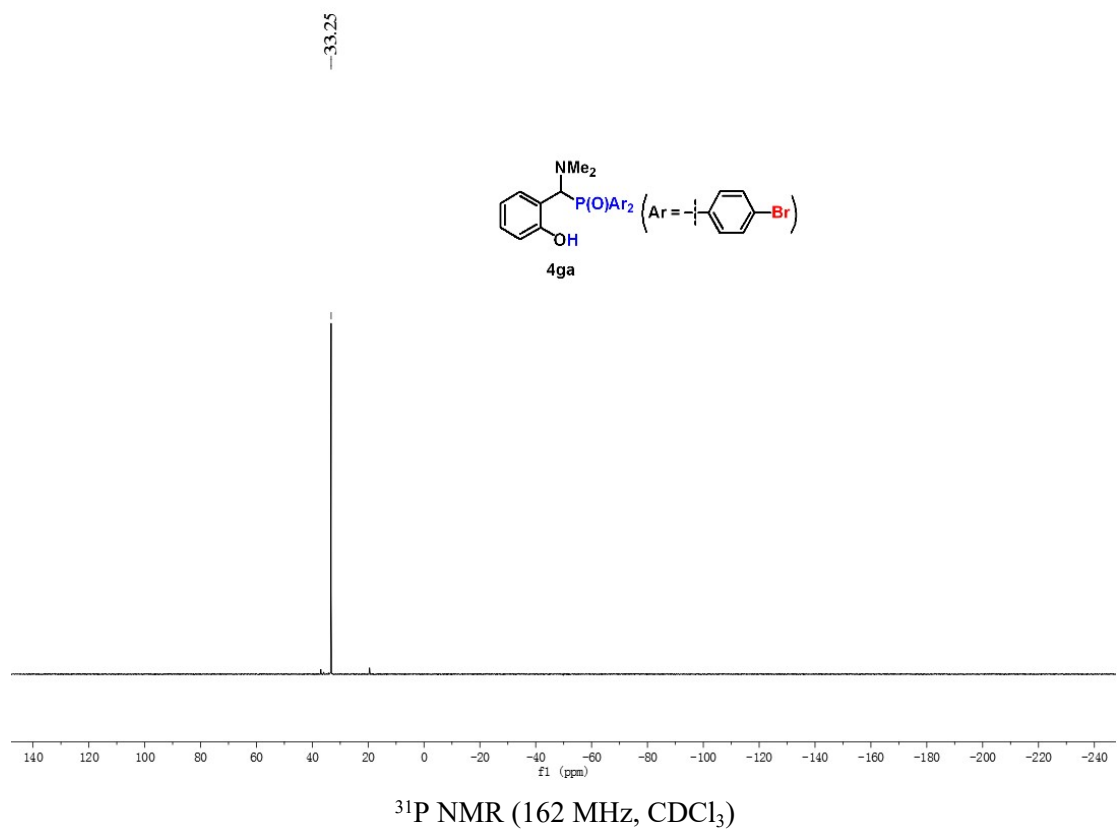

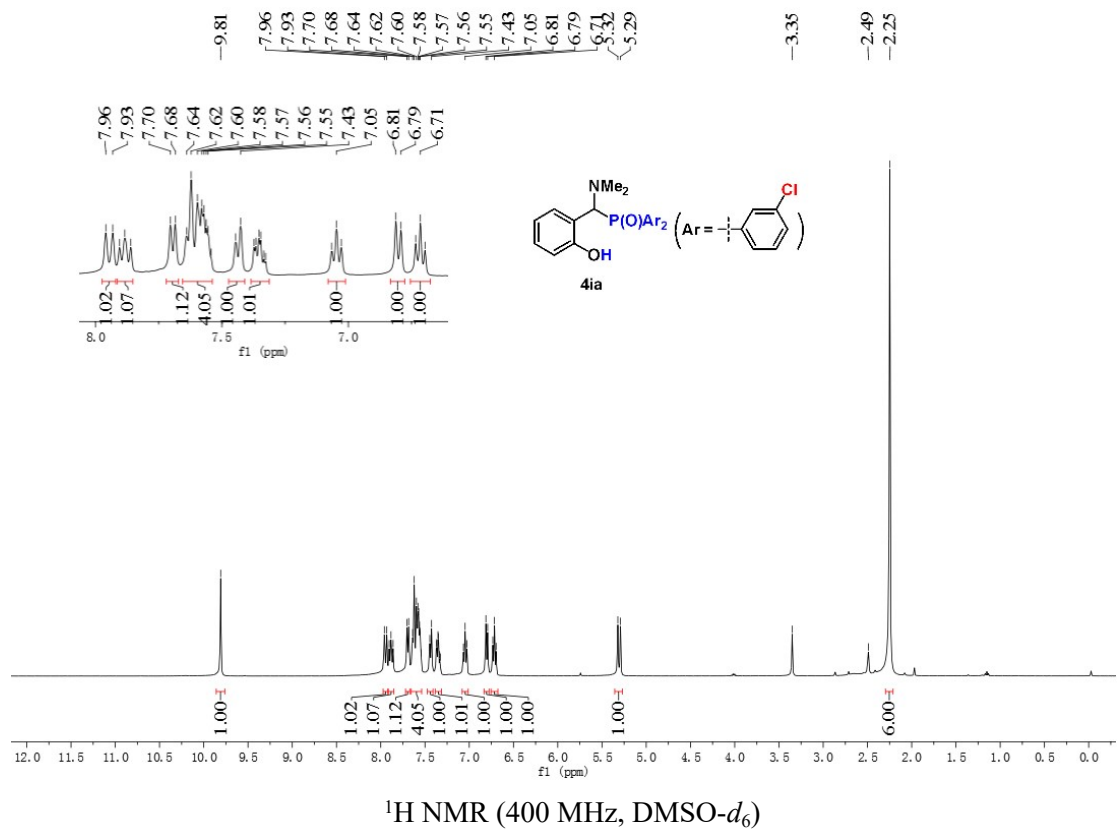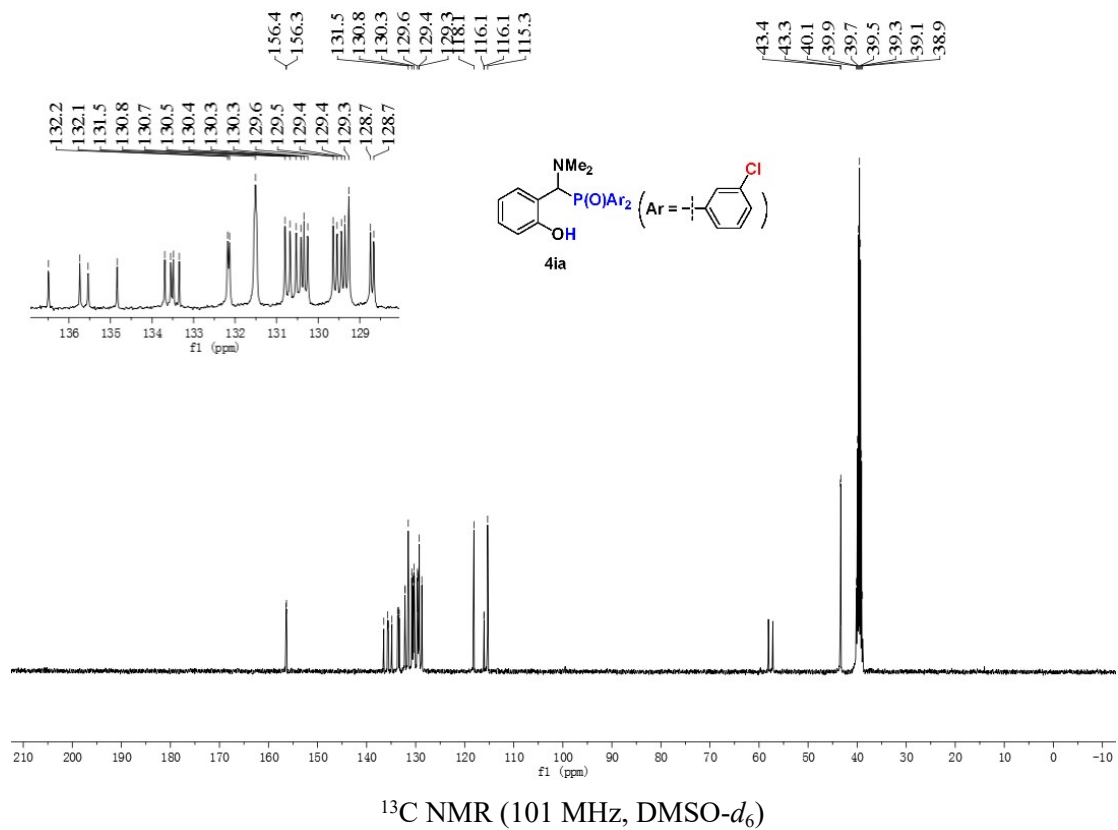

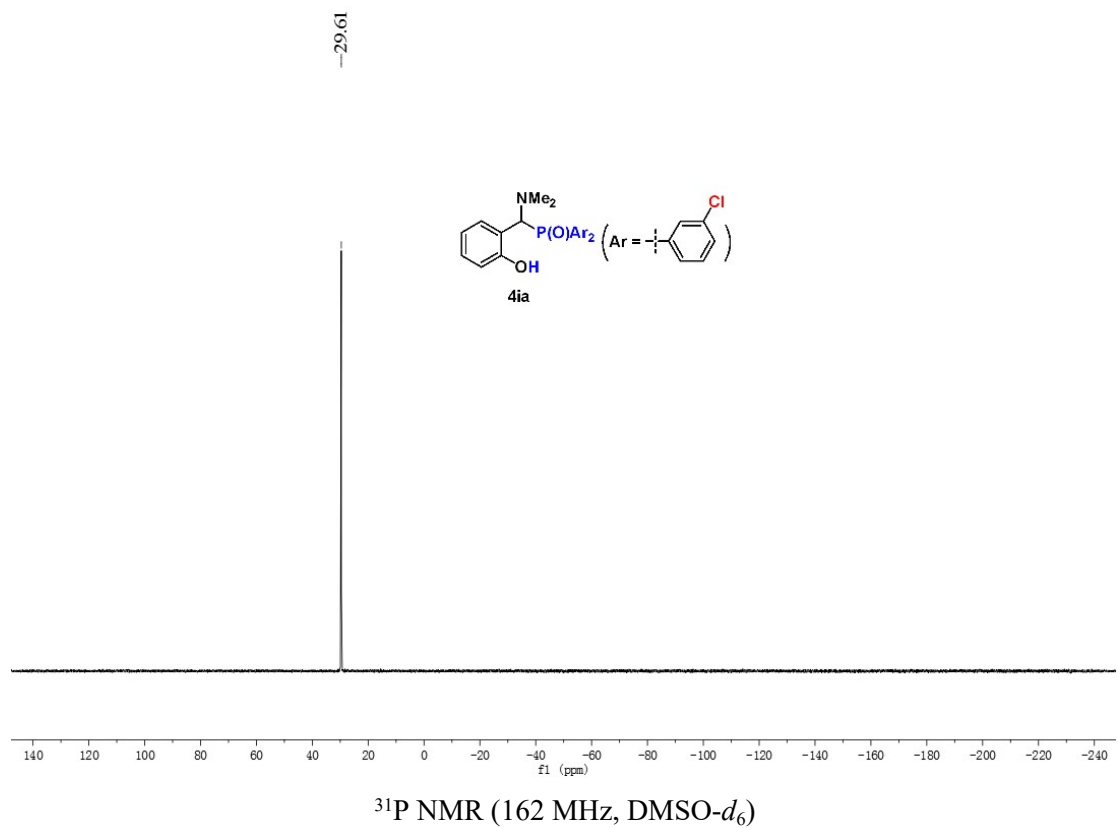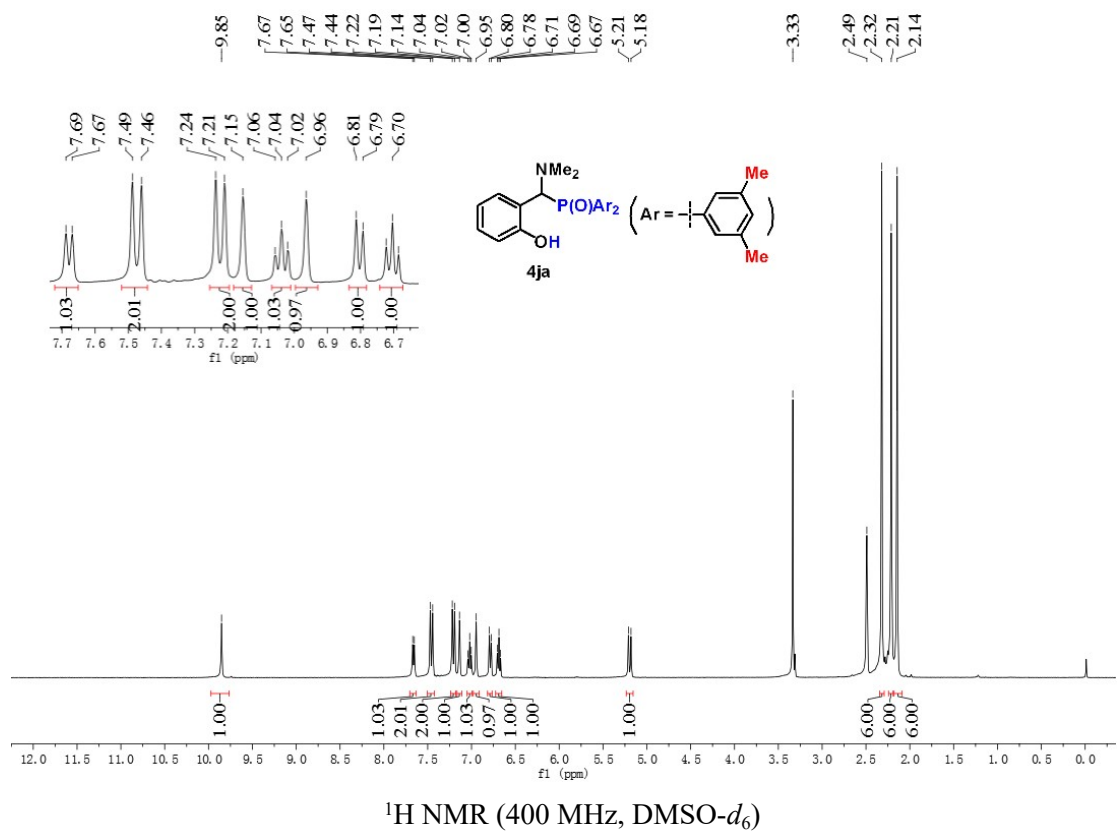

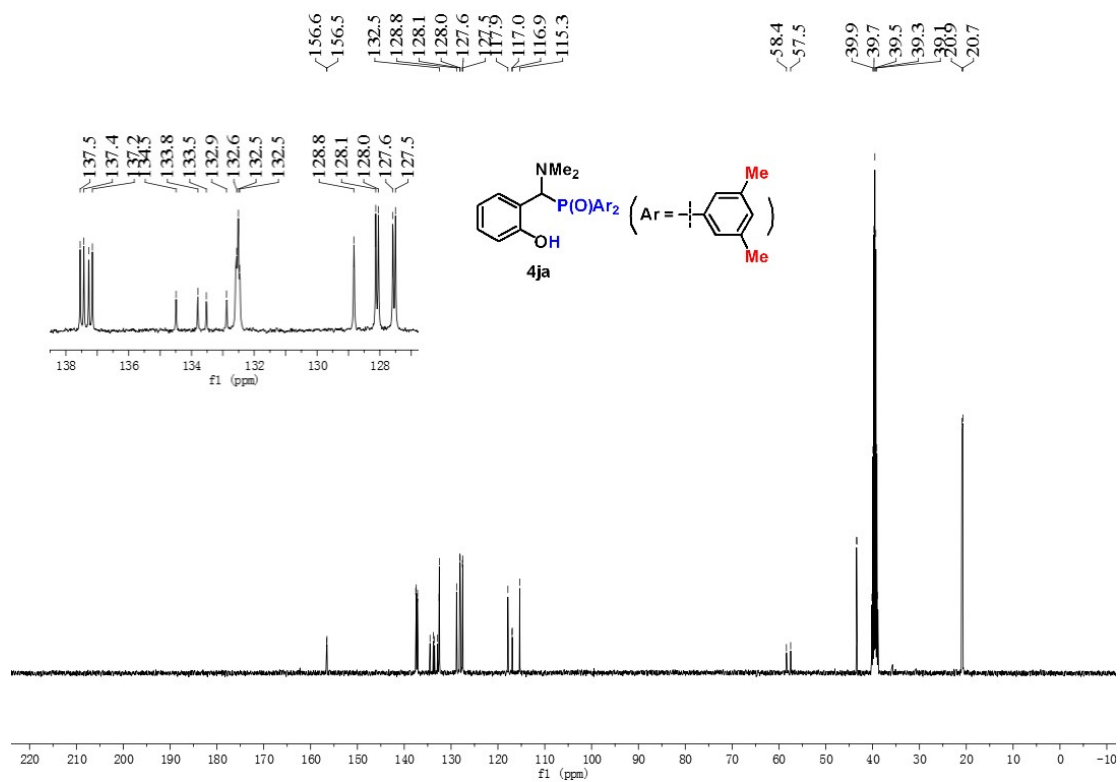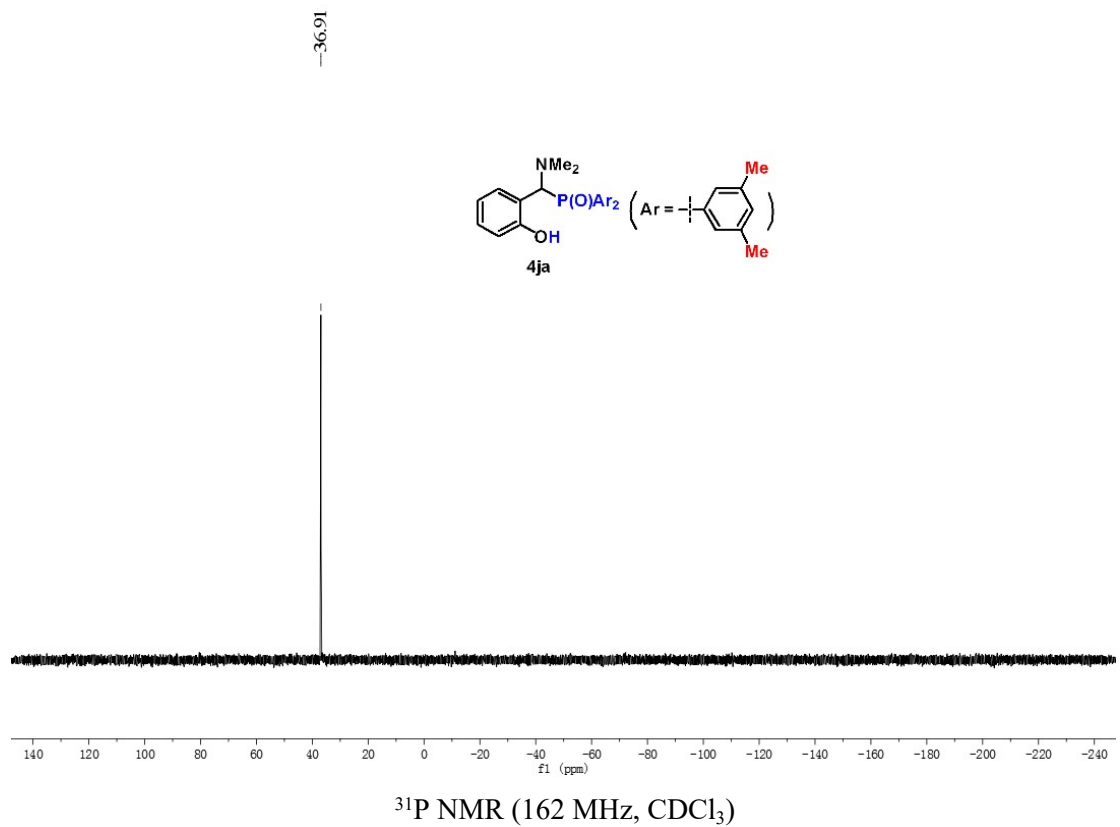

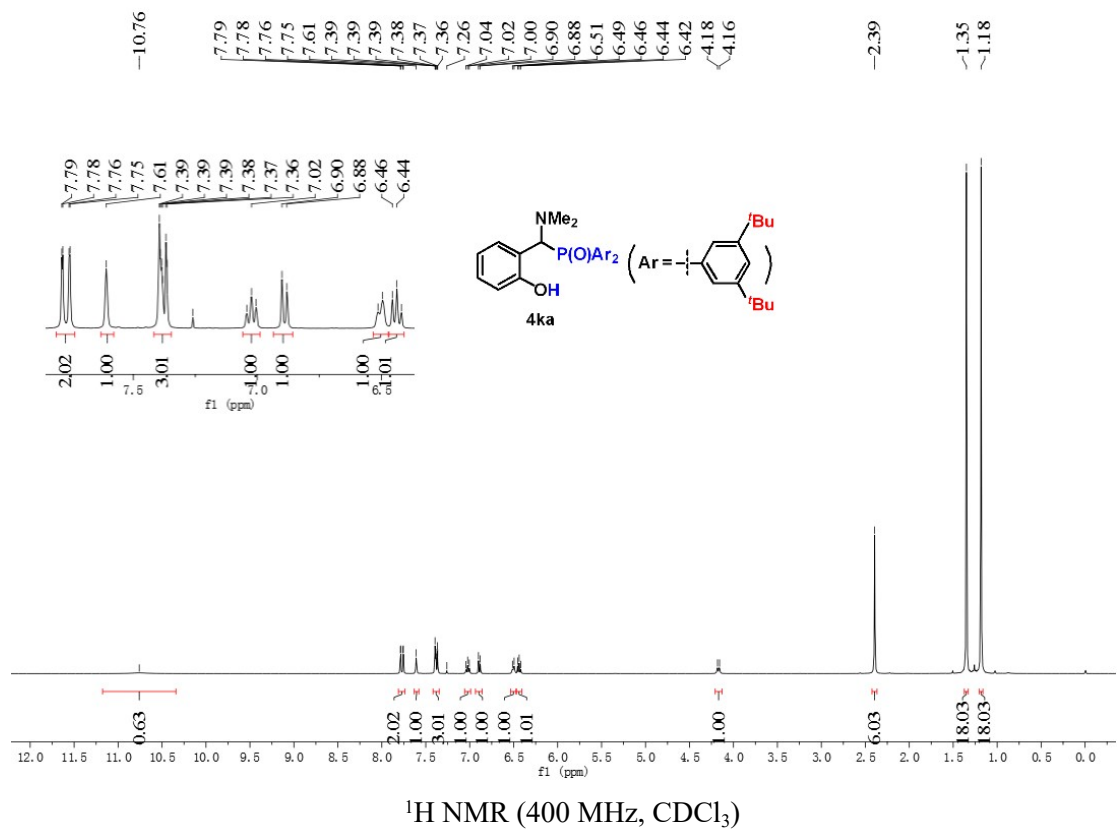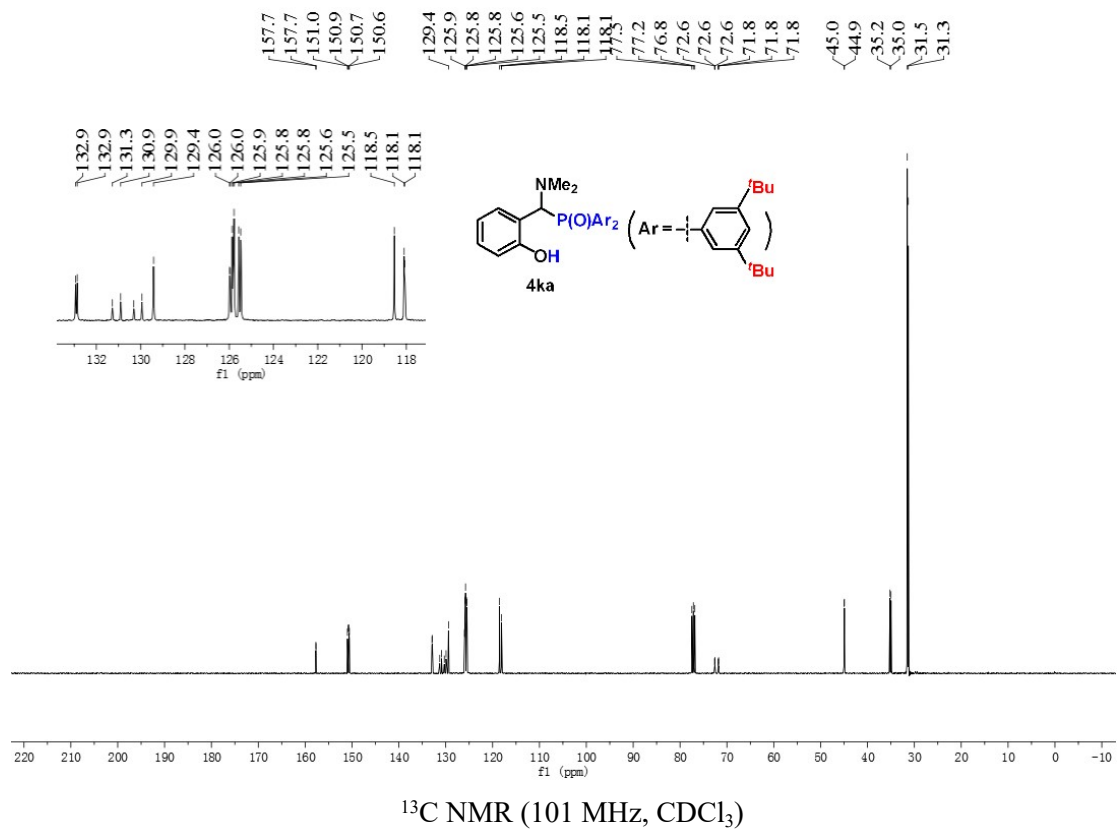

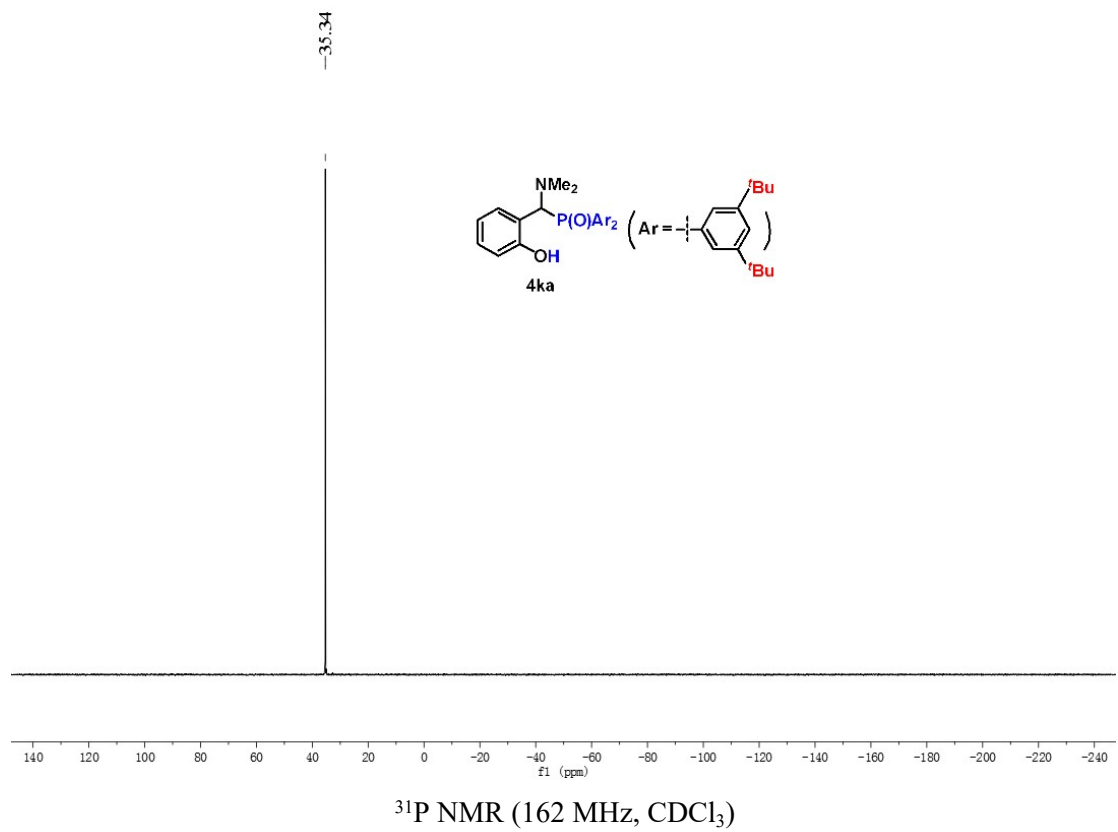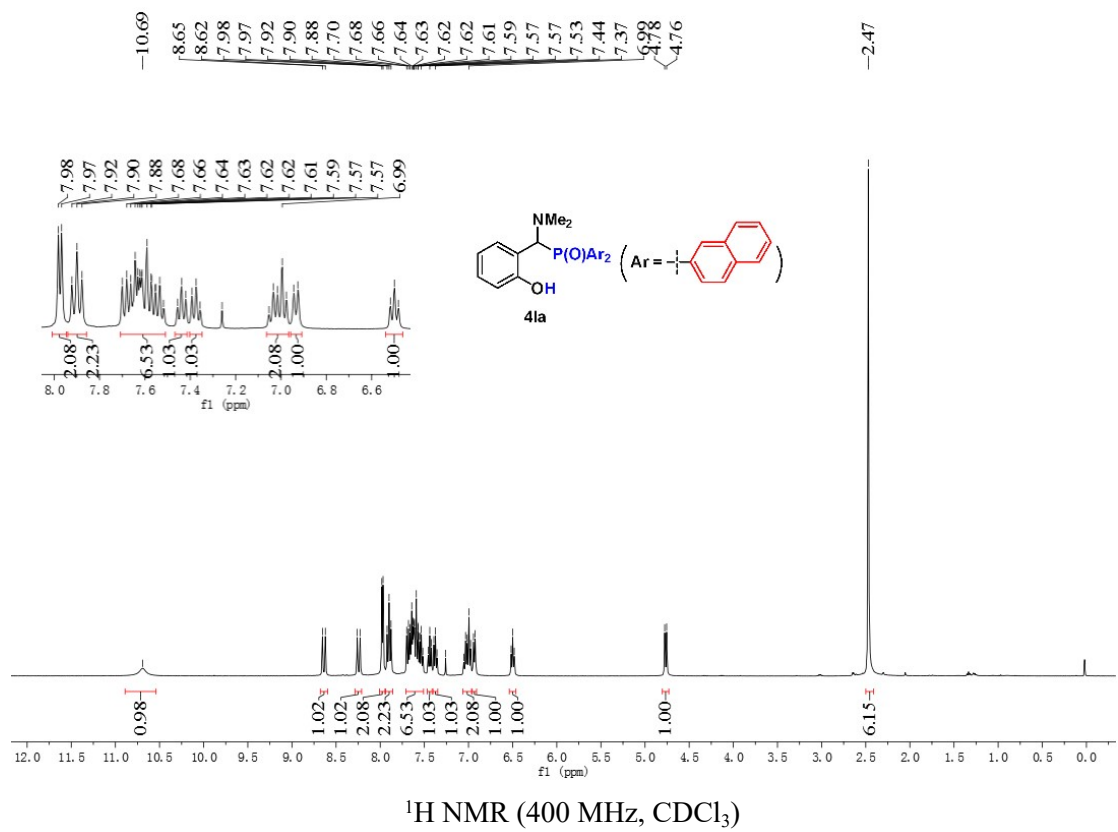

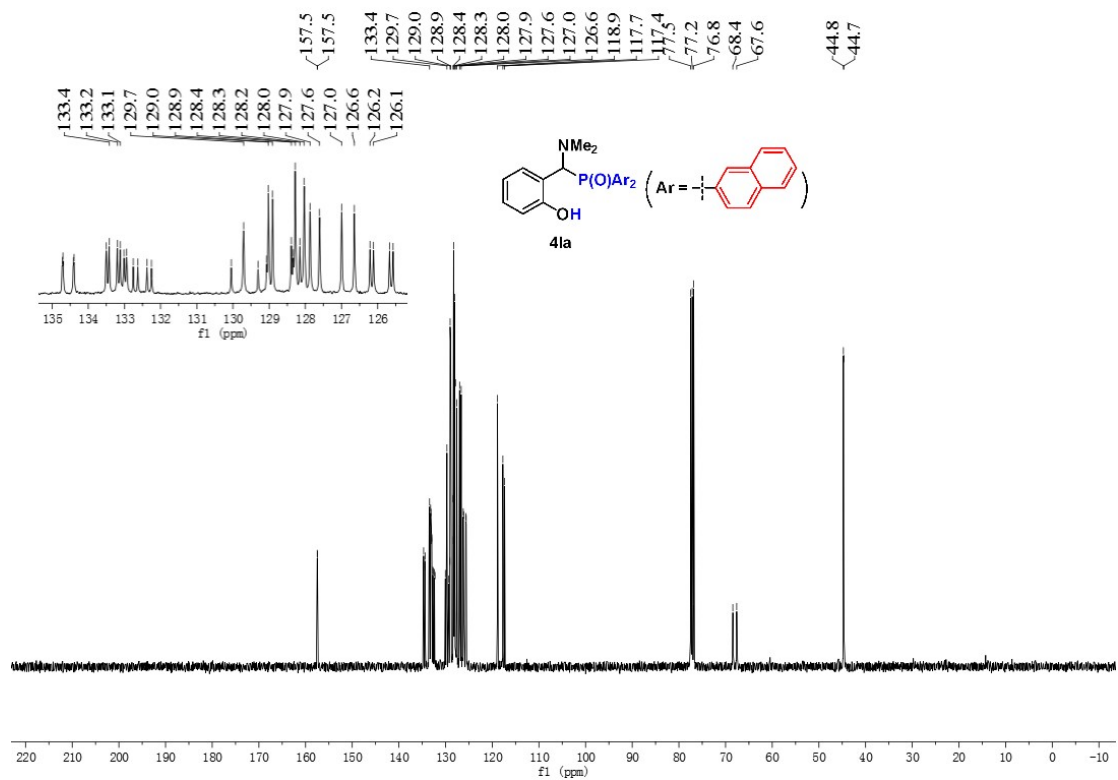

$^{13}\text{C}$  NMR (101 MHz,  $\text{CDCl}_3$ )

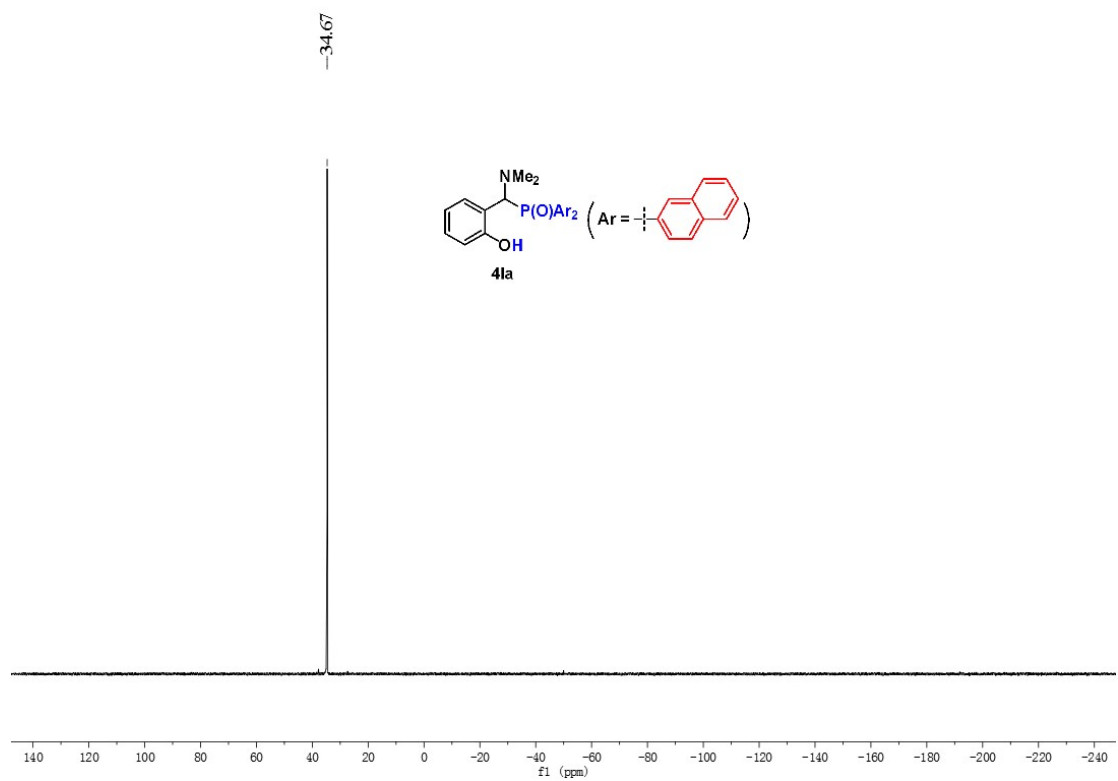

$^{31}\text{P}$  NMR (162 MHz,  $\text{CDCl}_3$ )

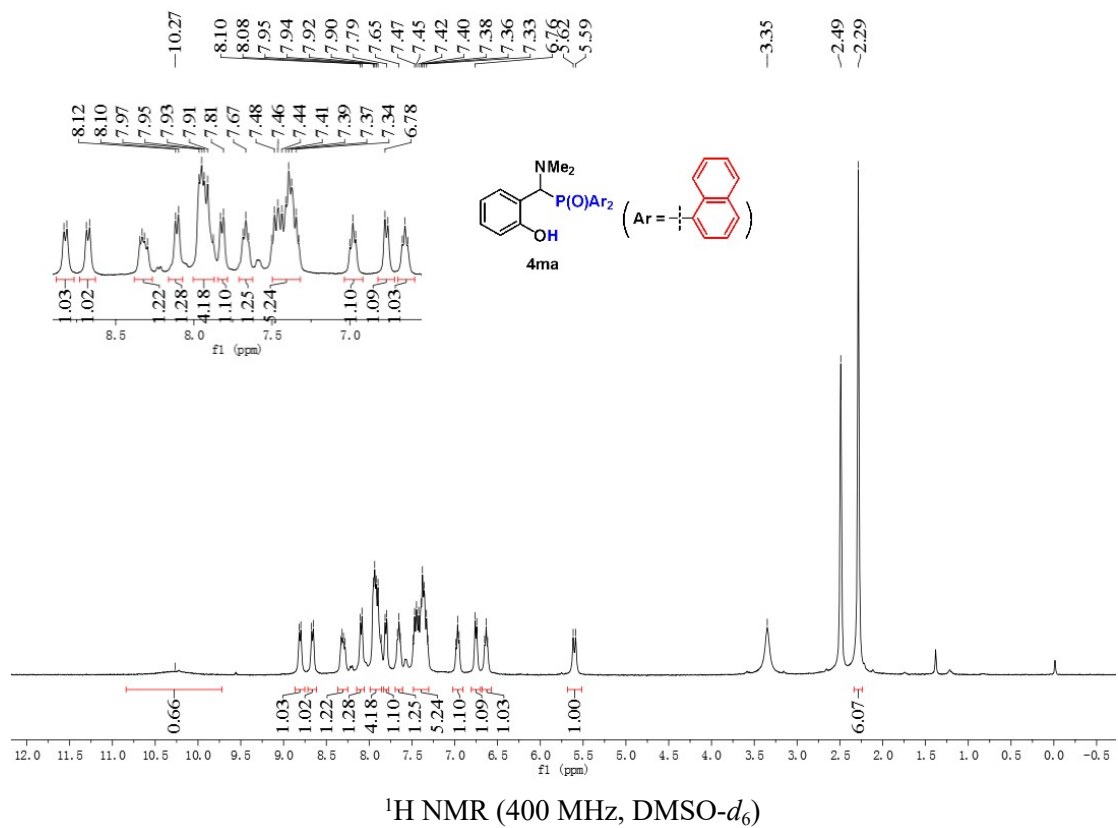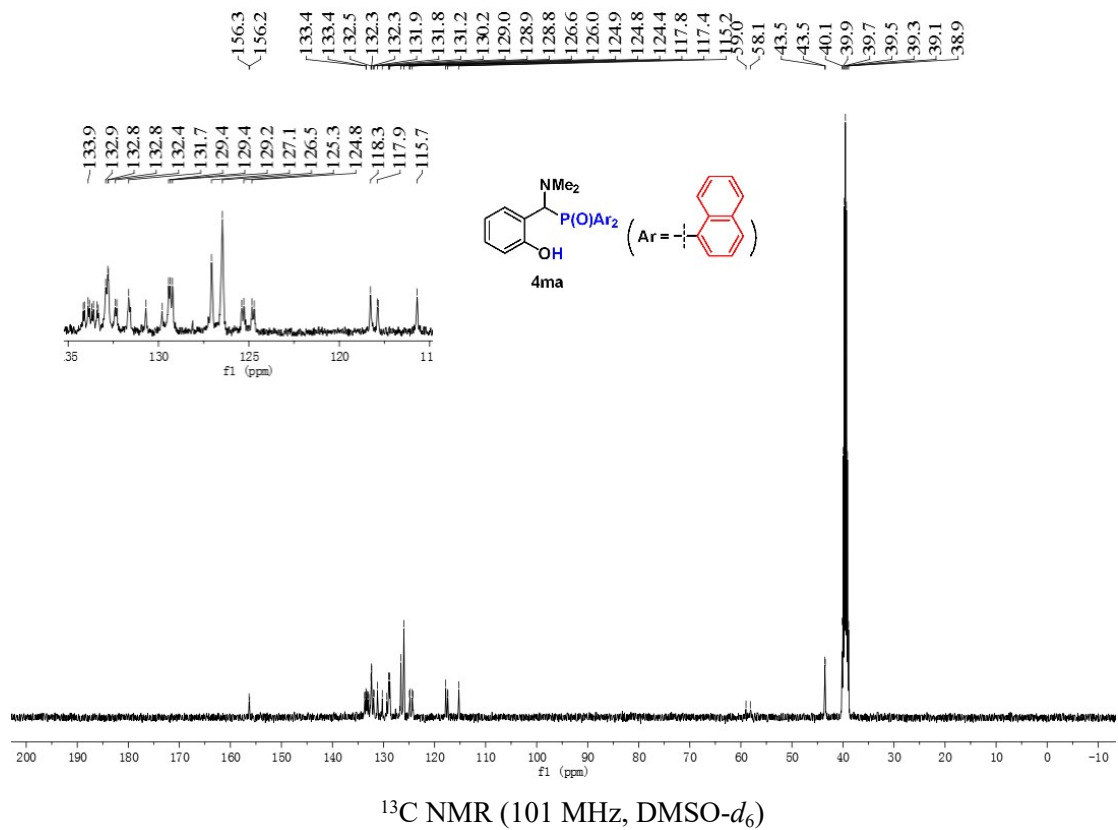



-36.85

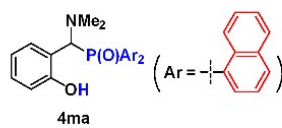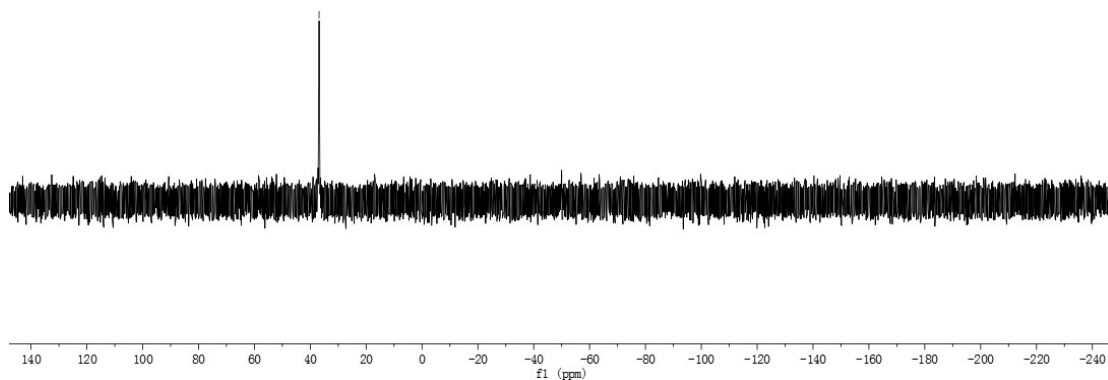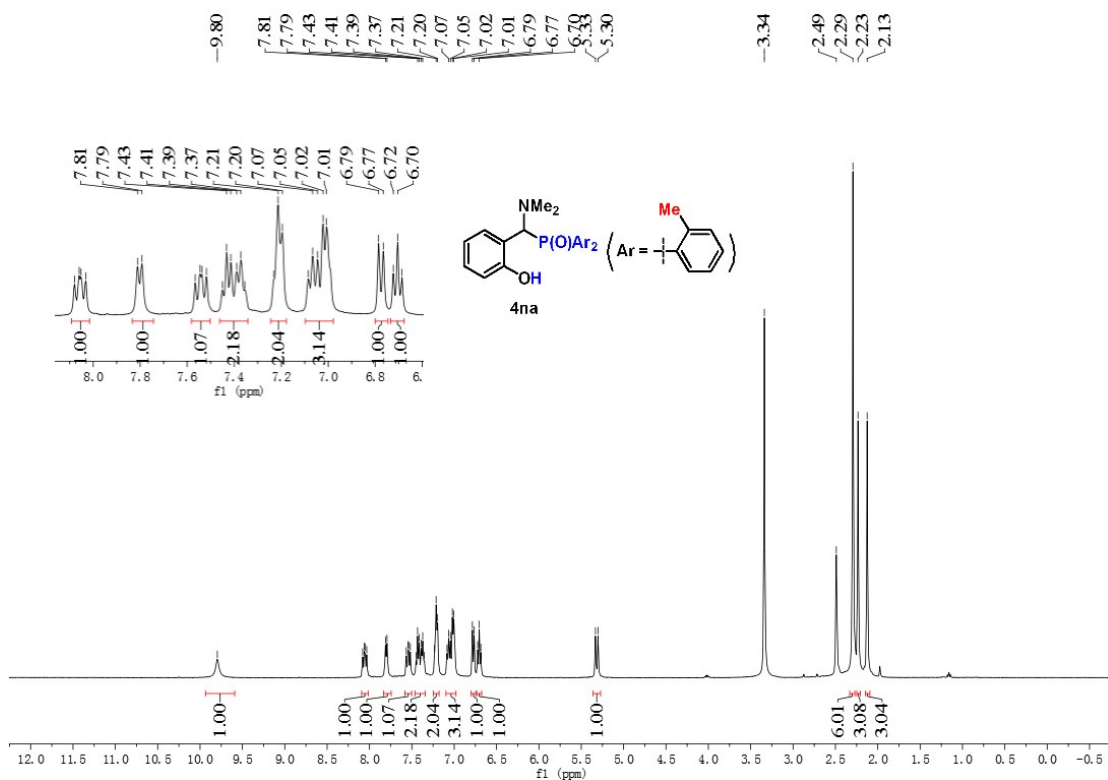

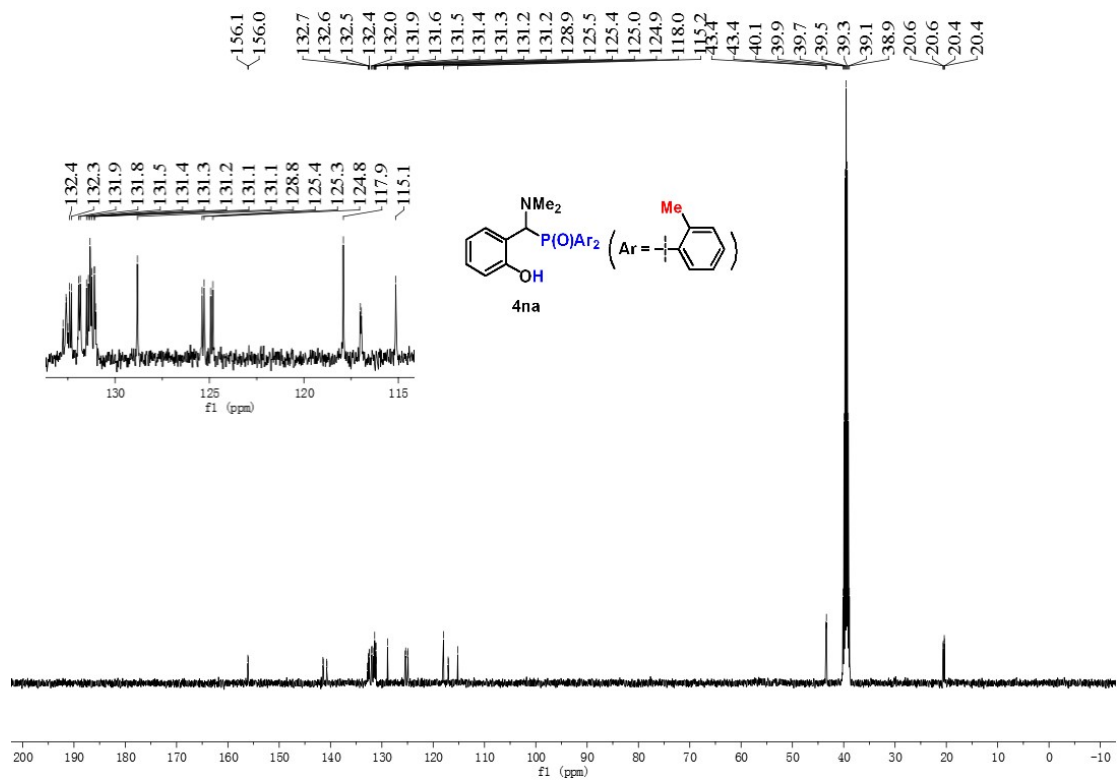

$^{13}\text{C}$  NMR (101 MHz,  $\text{DMSO-}d_6$ )

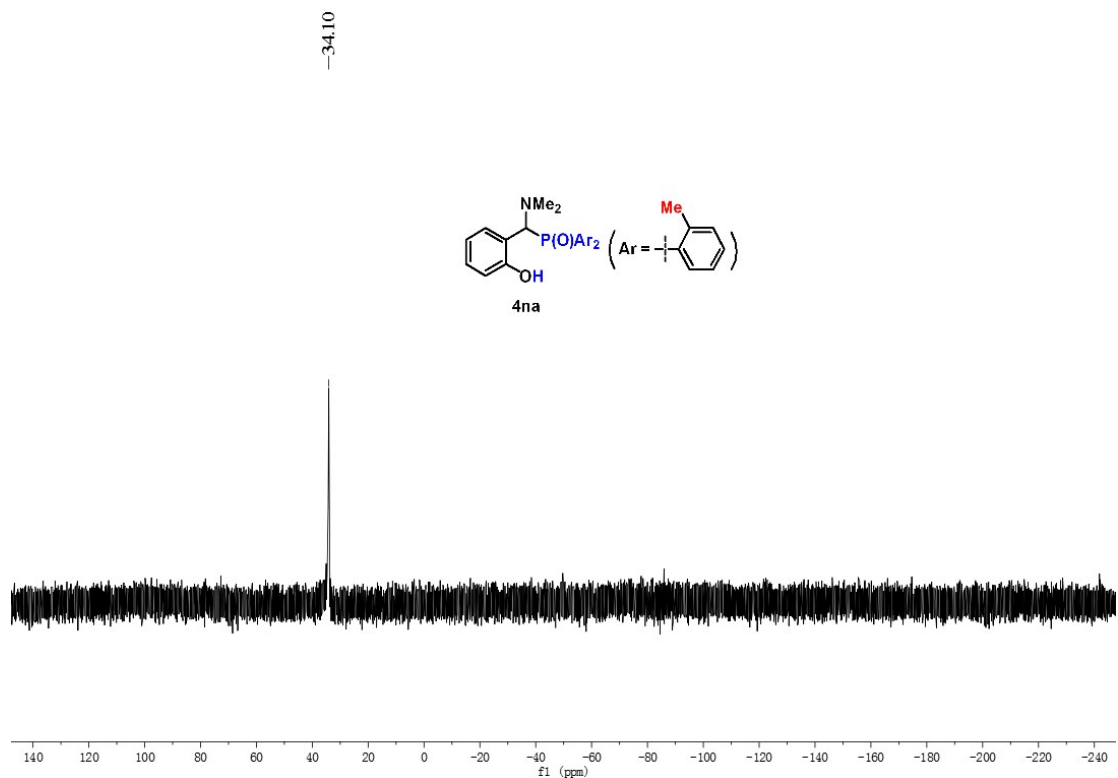

$^{31}\text{P}$  NMR (162 MHz,  $\text{DMSO-}d_6$ )

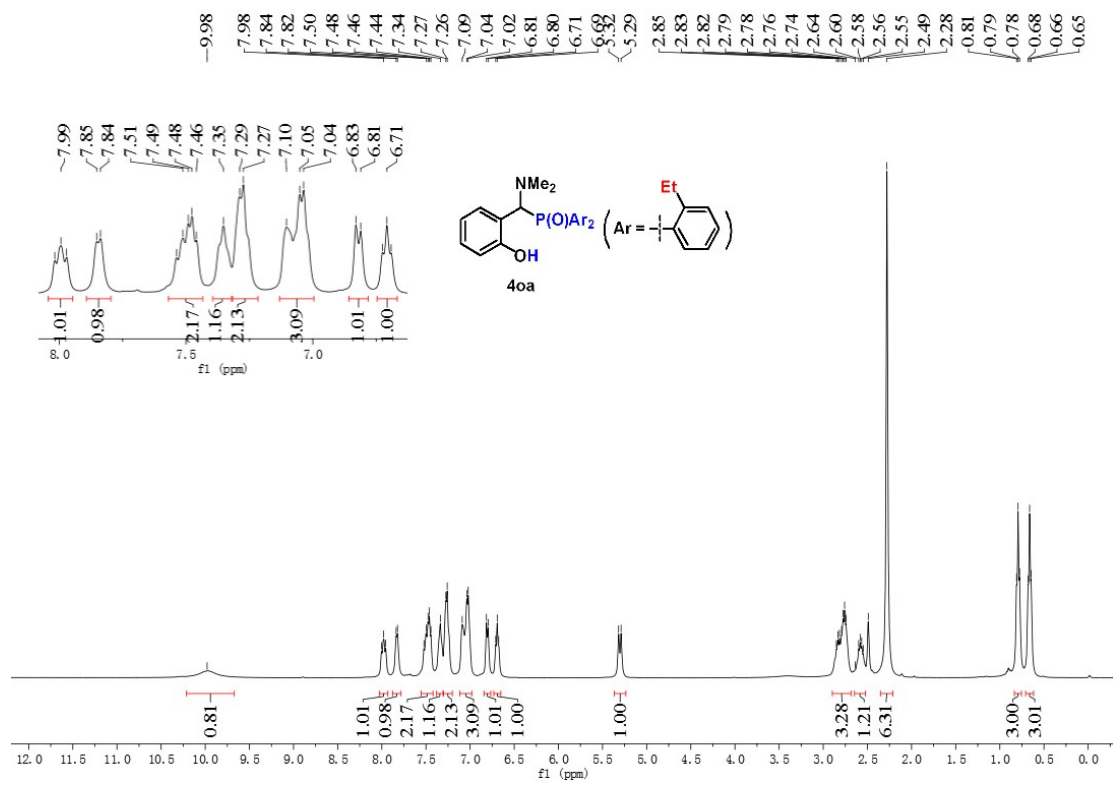

**<sup>1</sup>H NMR (400 MHz, DMSO-*d*<sub>6</sub>)**

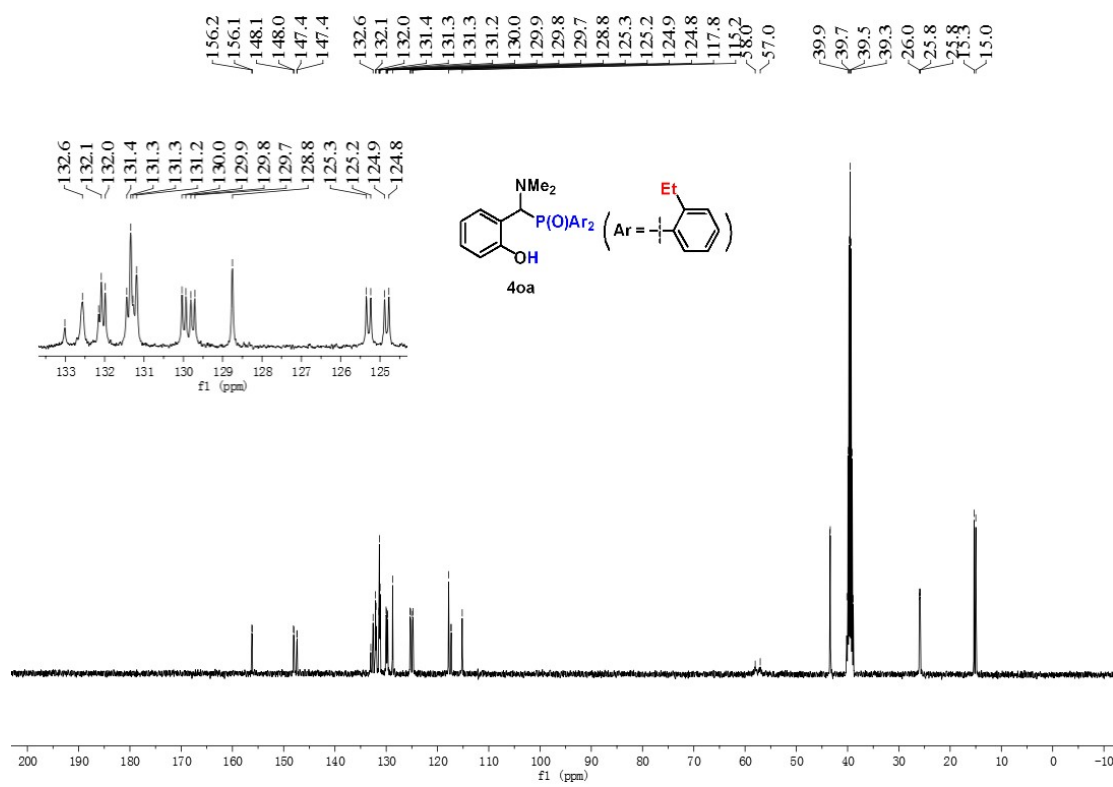

**<sup>13</sup>C NMR (101 MHz, DMSO-*d*<sub>6</sub>)**

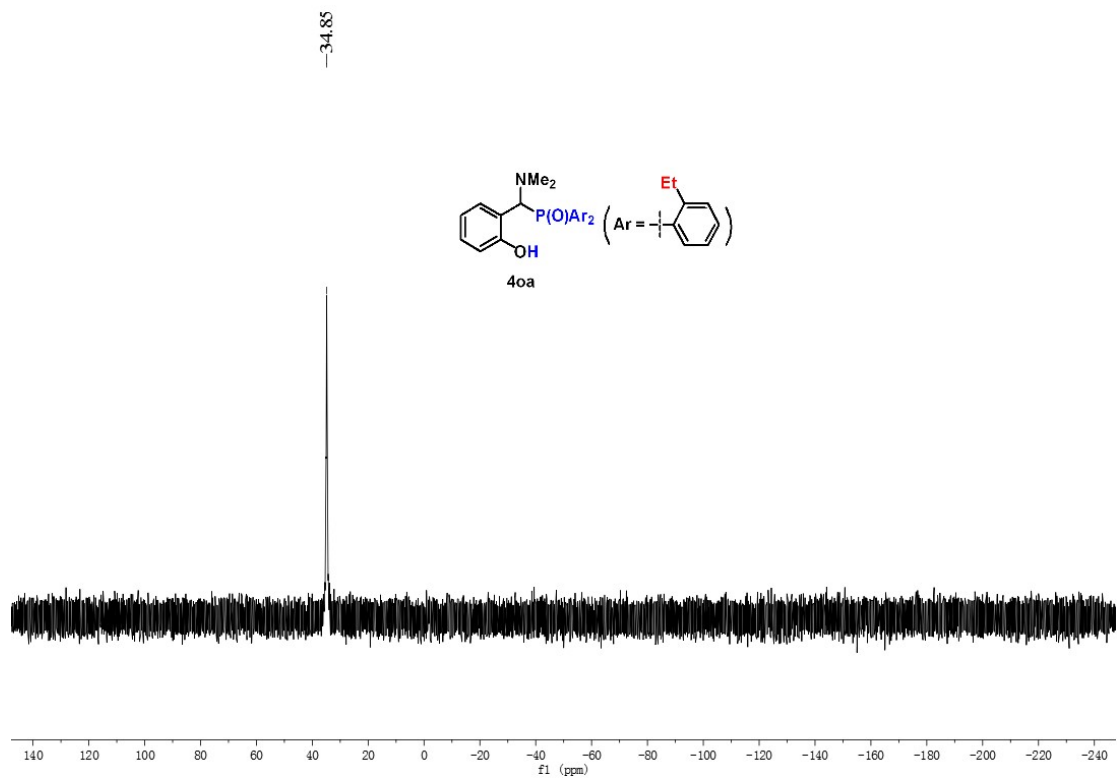

$^{31}\text{P}$  NMR (162 MHz,  $\text{DMSO-}d_6$ )

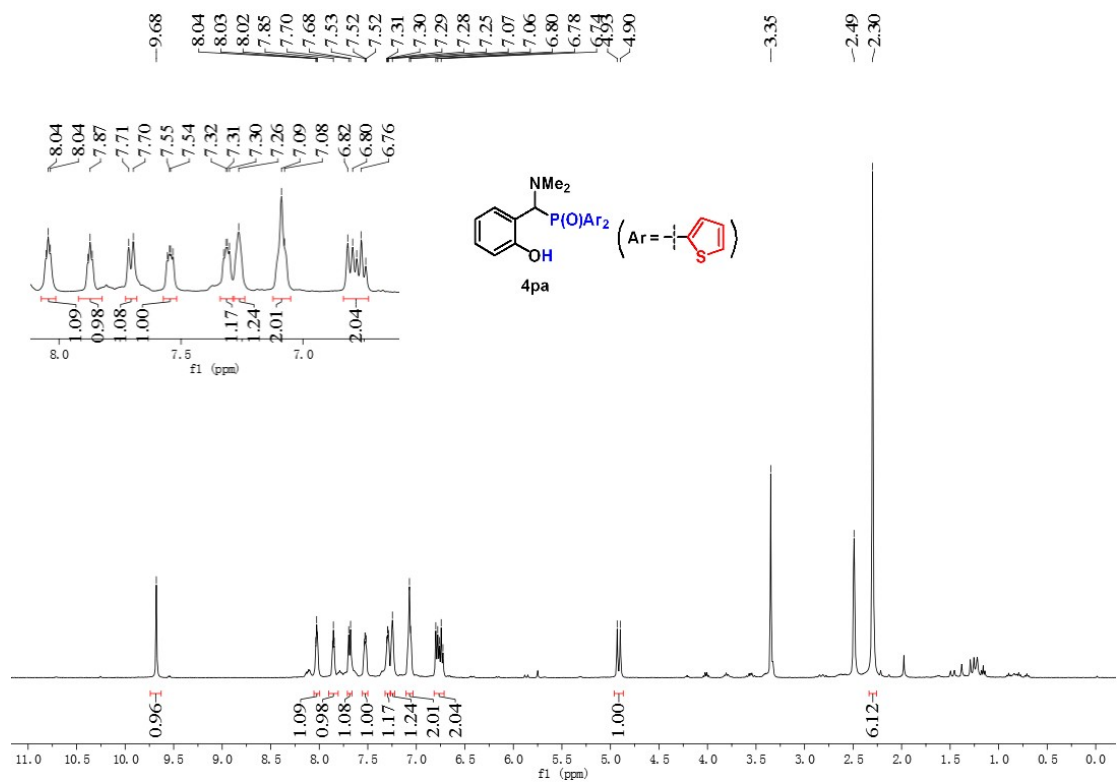

$^1\text{H}$  NMR (400 MHz,  $\text{DMSO-}d_6$ )

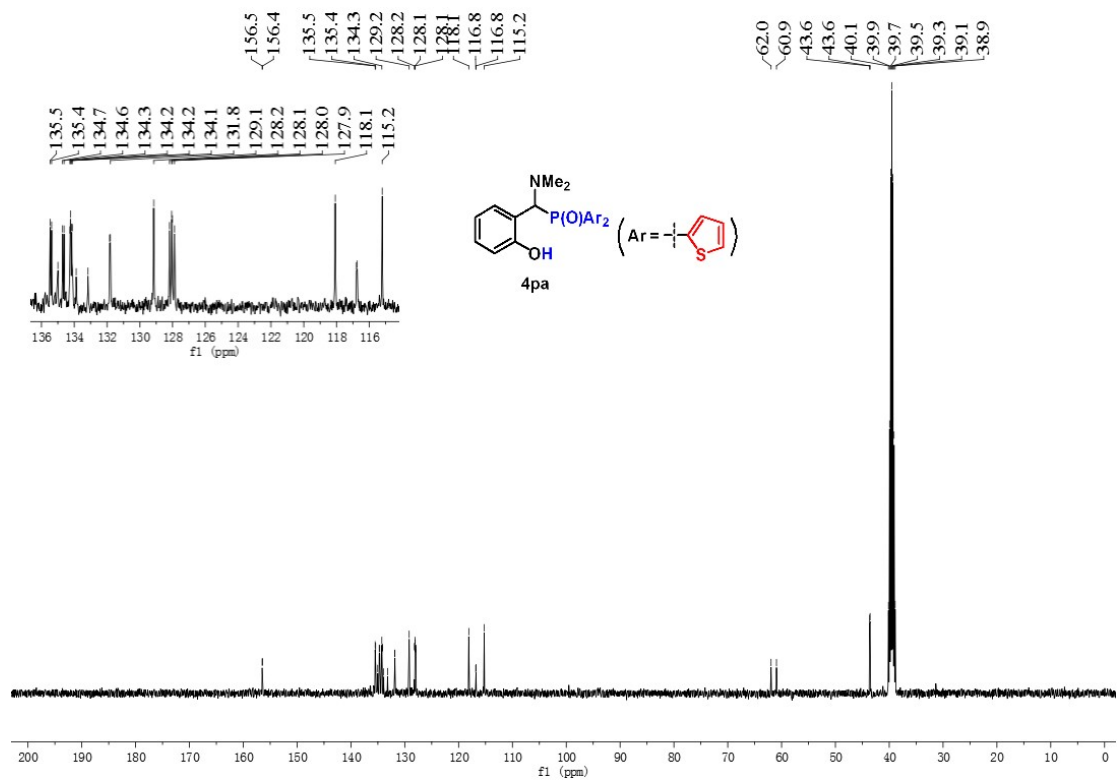

$^{13}\text{C}$  NMR (101 MHz,  $\text{DMSO-}d_6$ )

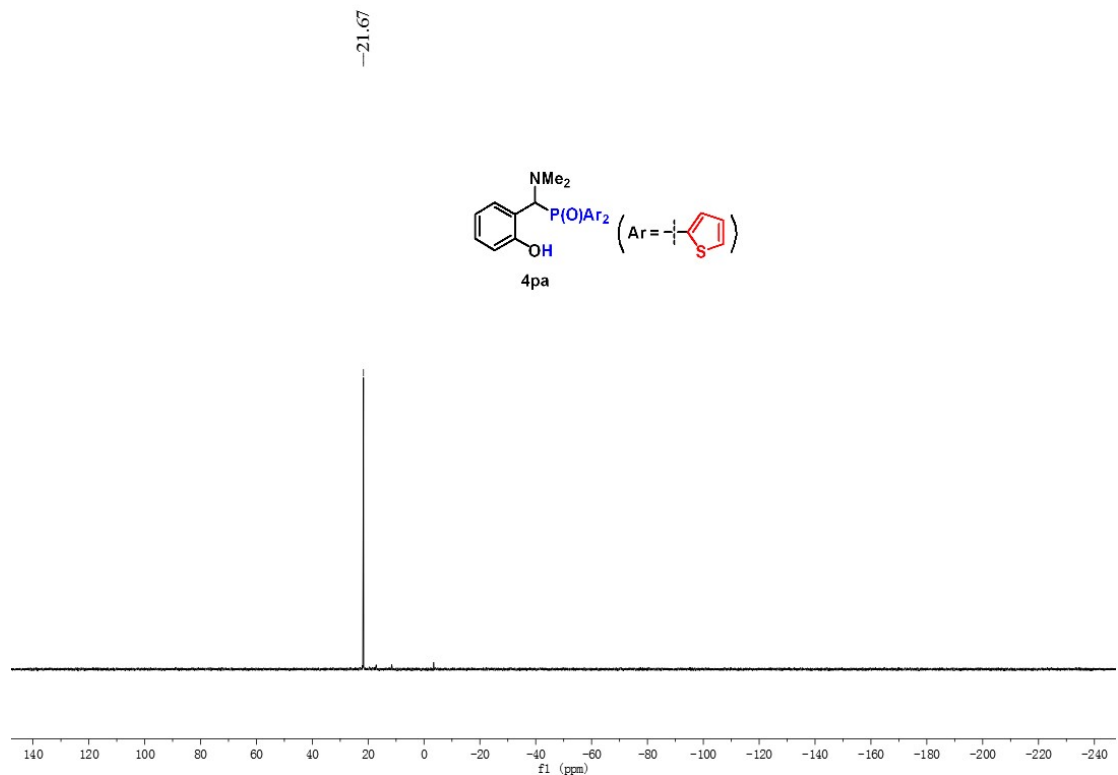

$^{31}\text{P}$  NMR (162 MHz,  $\text{DMSO-}d_6$ )

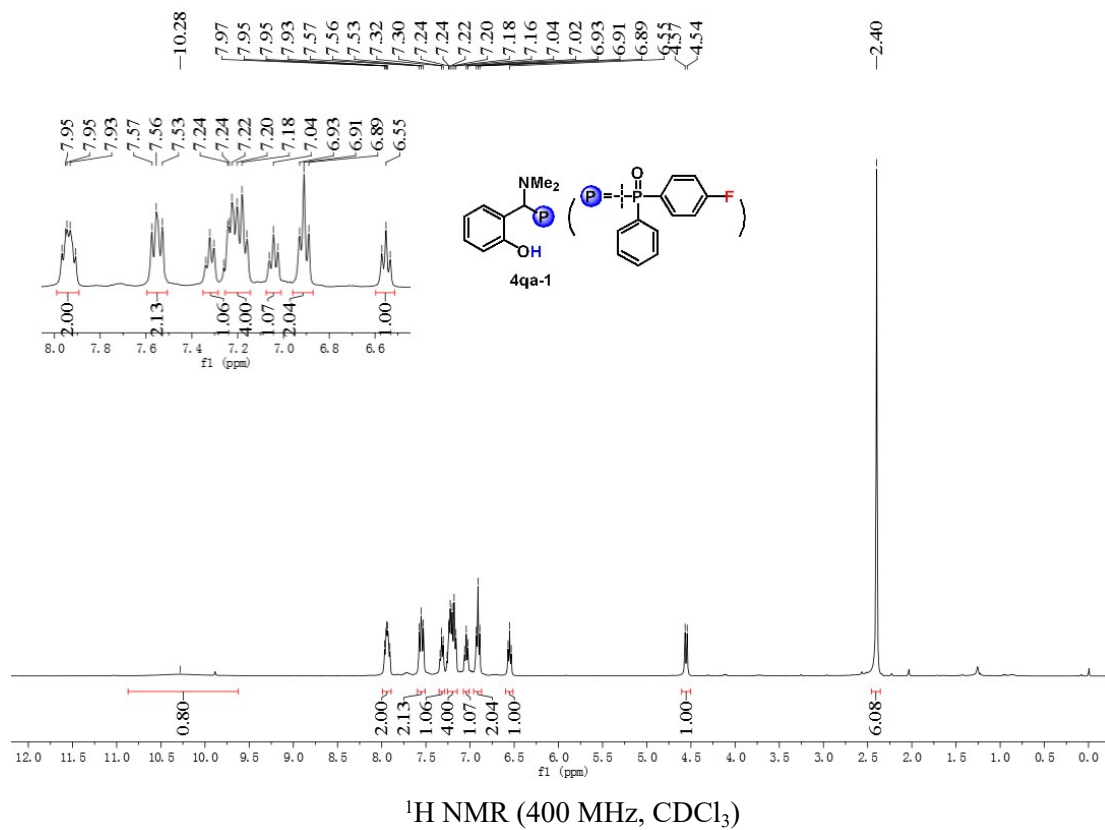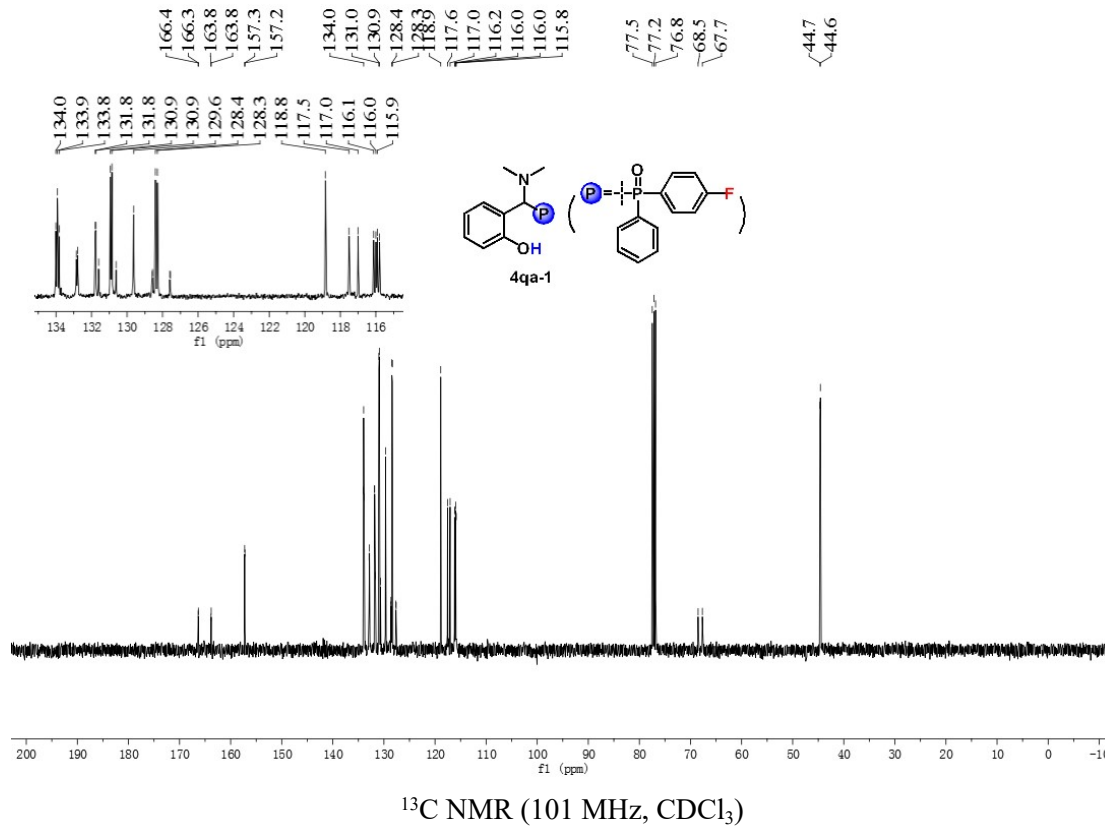

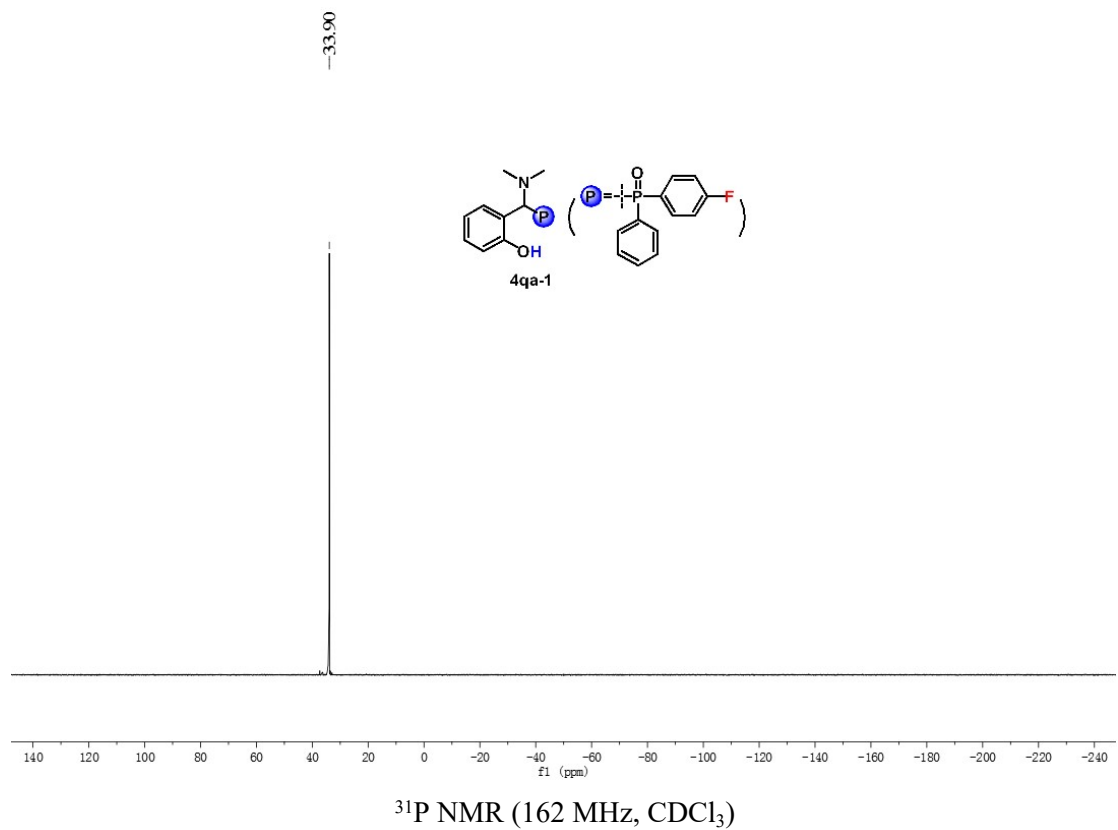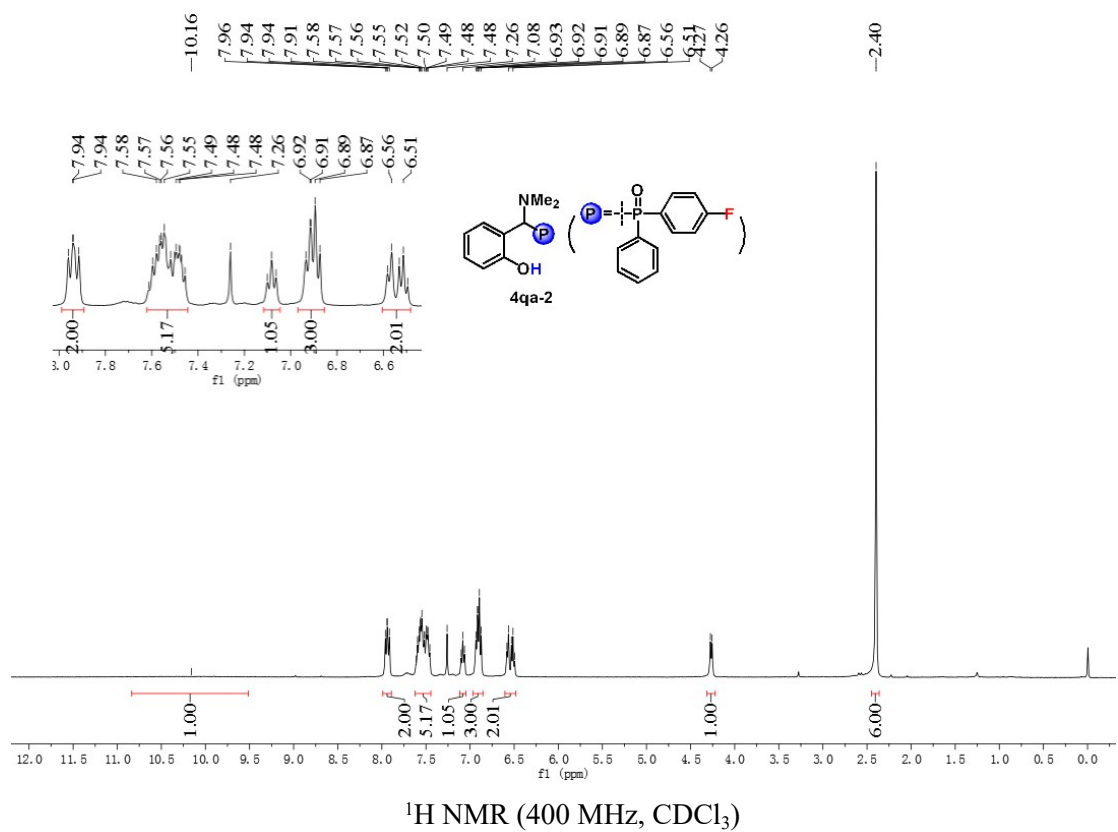

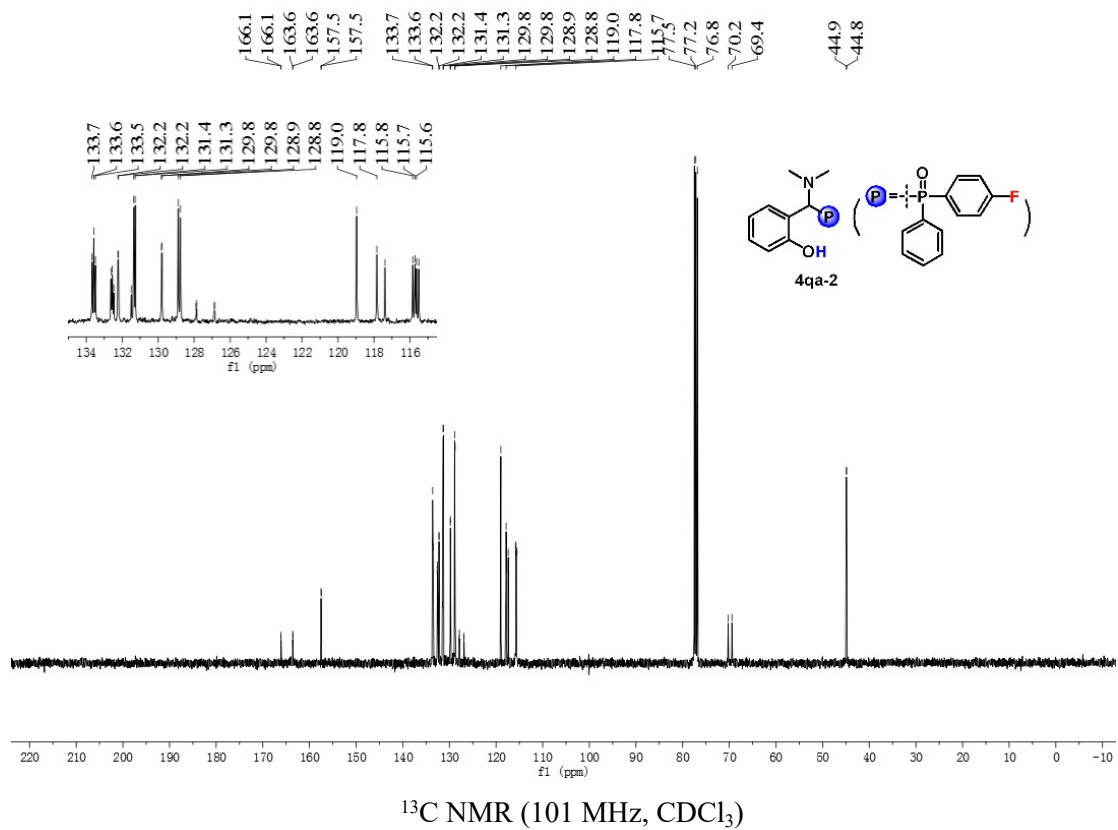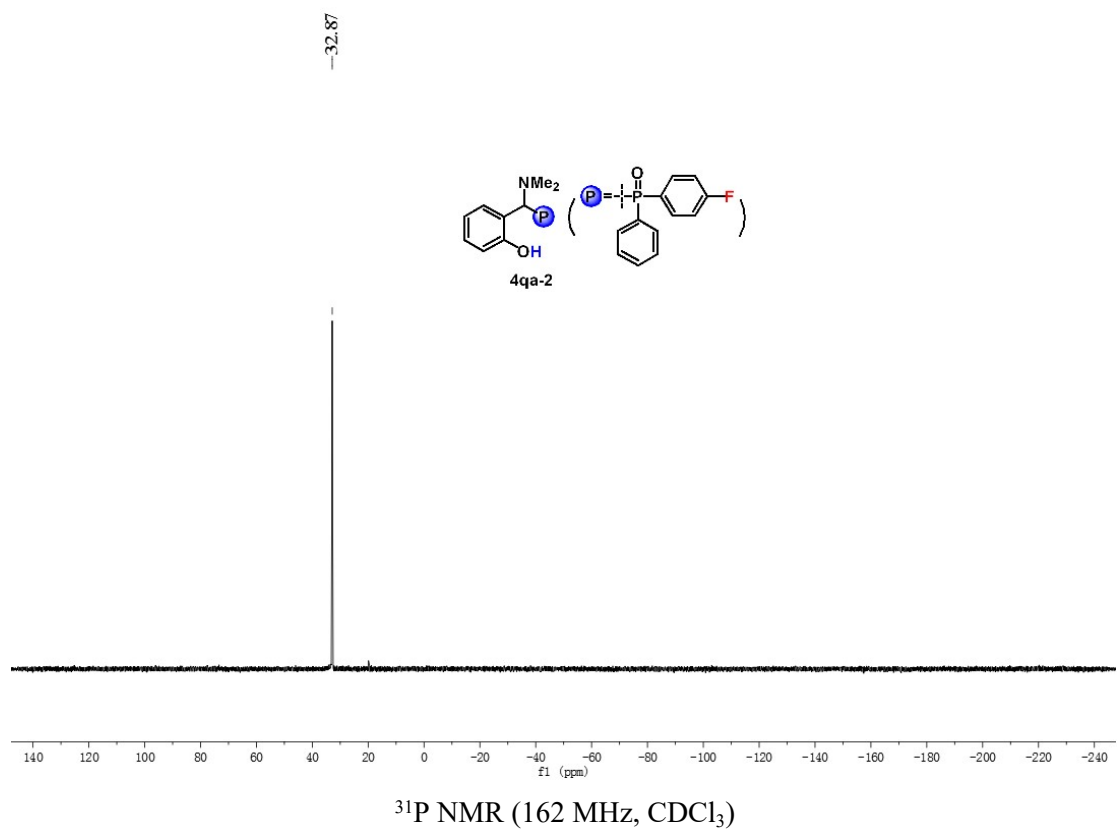



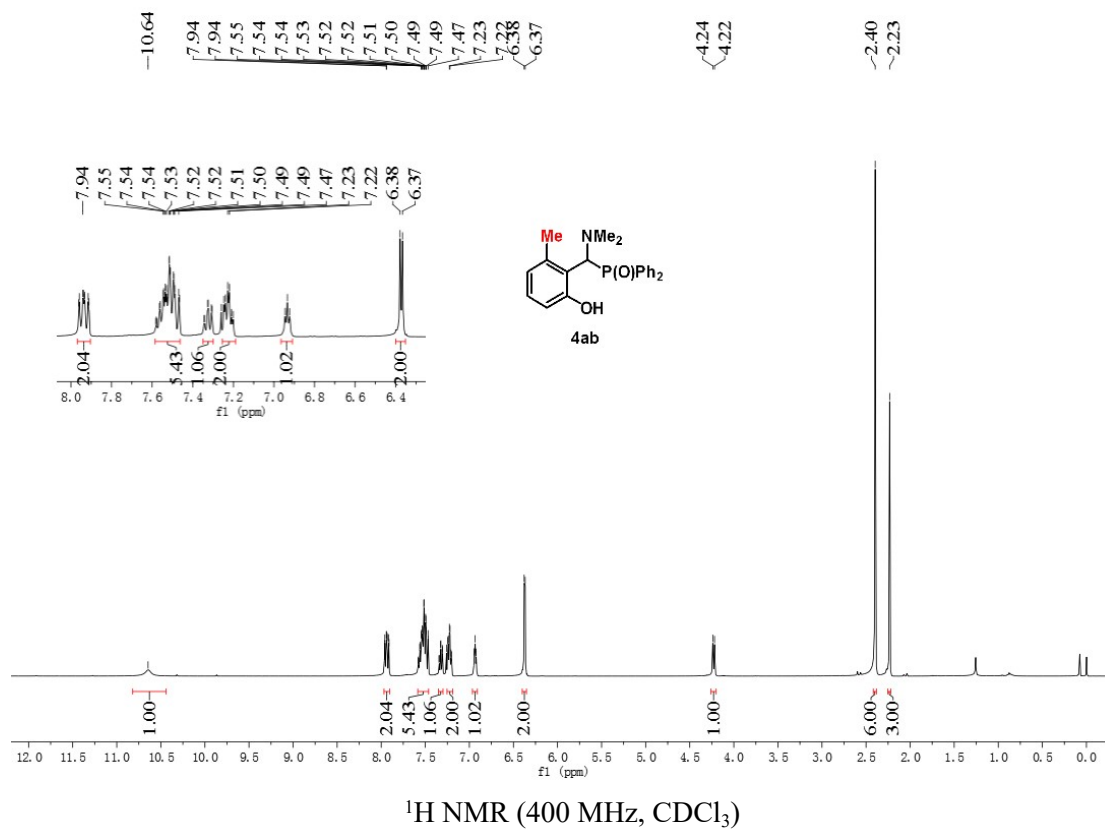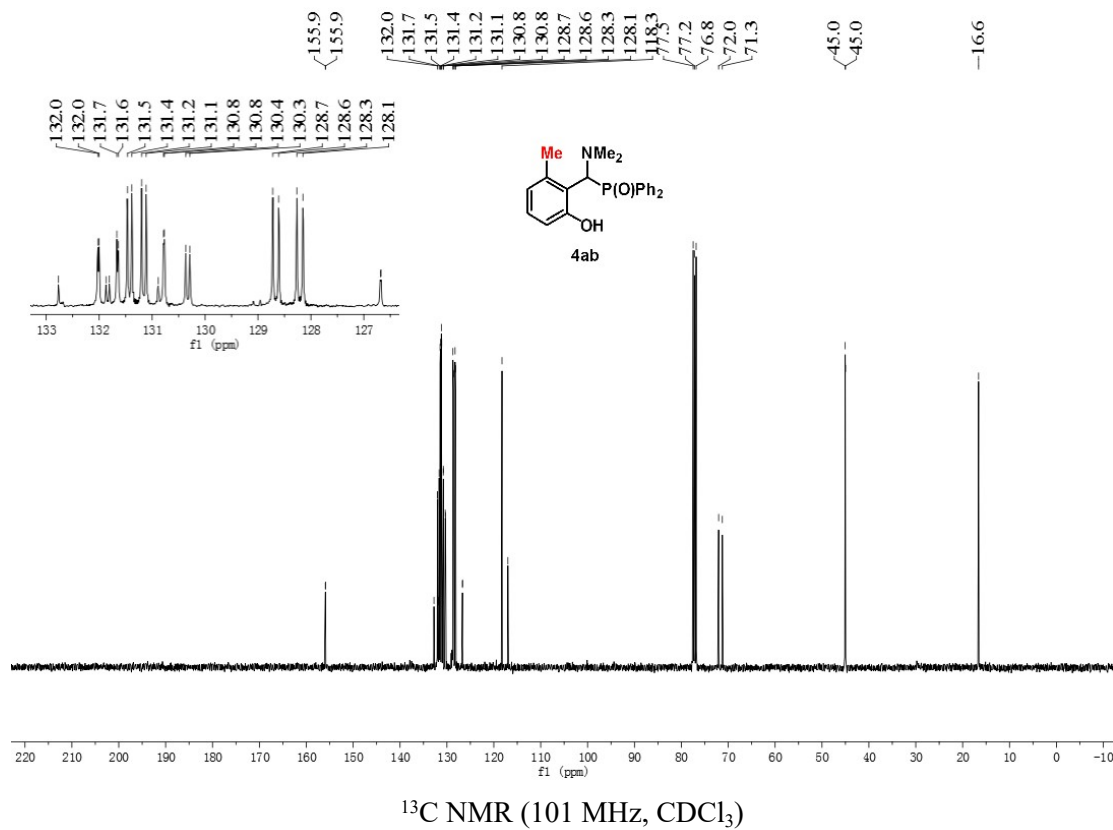

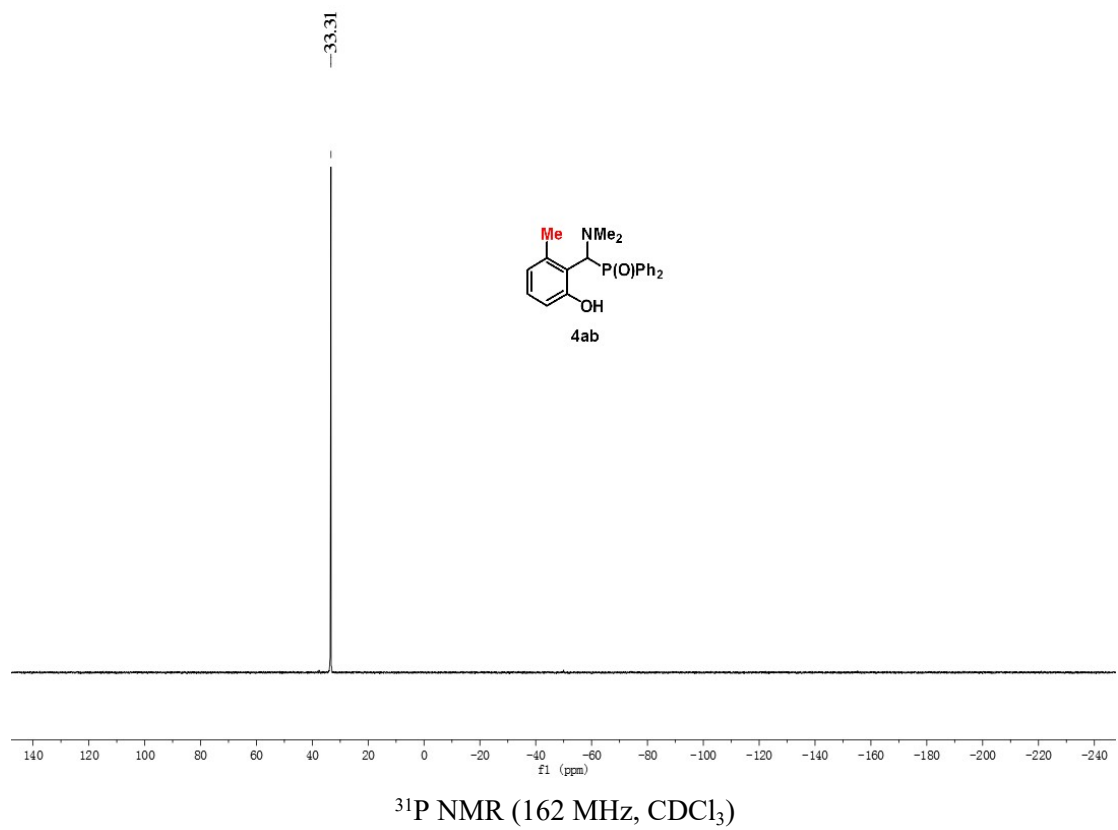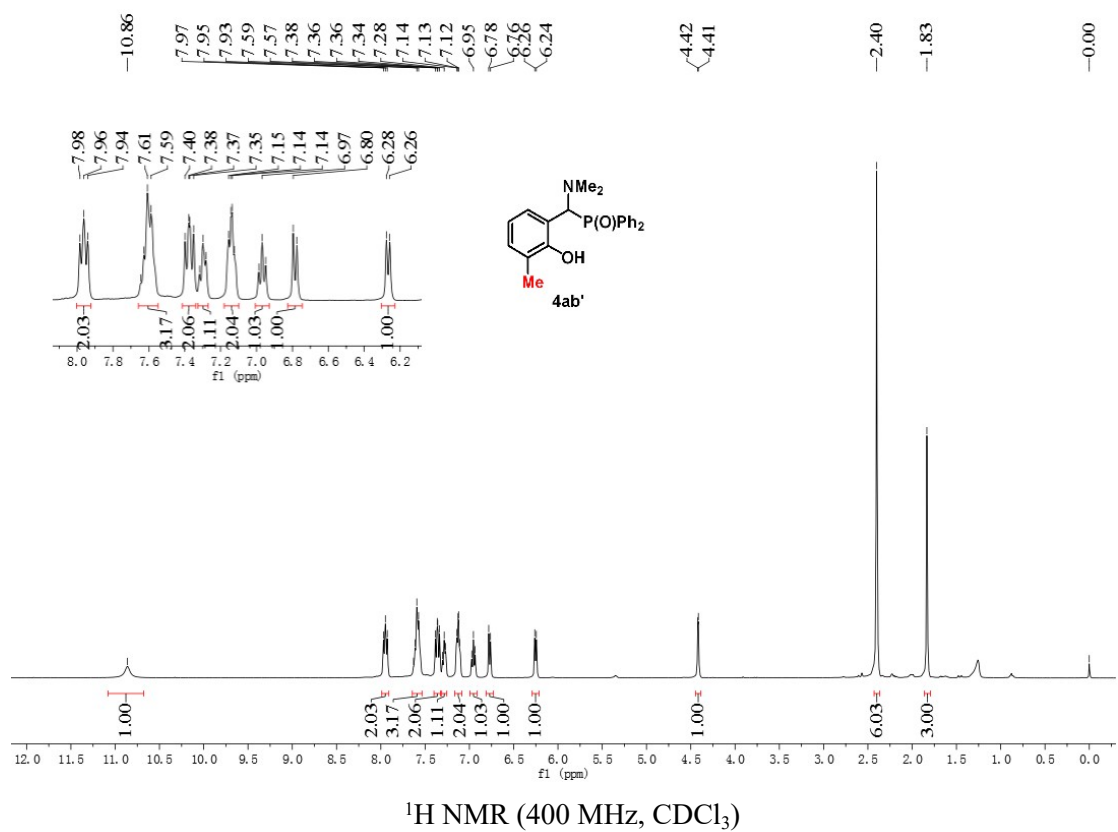

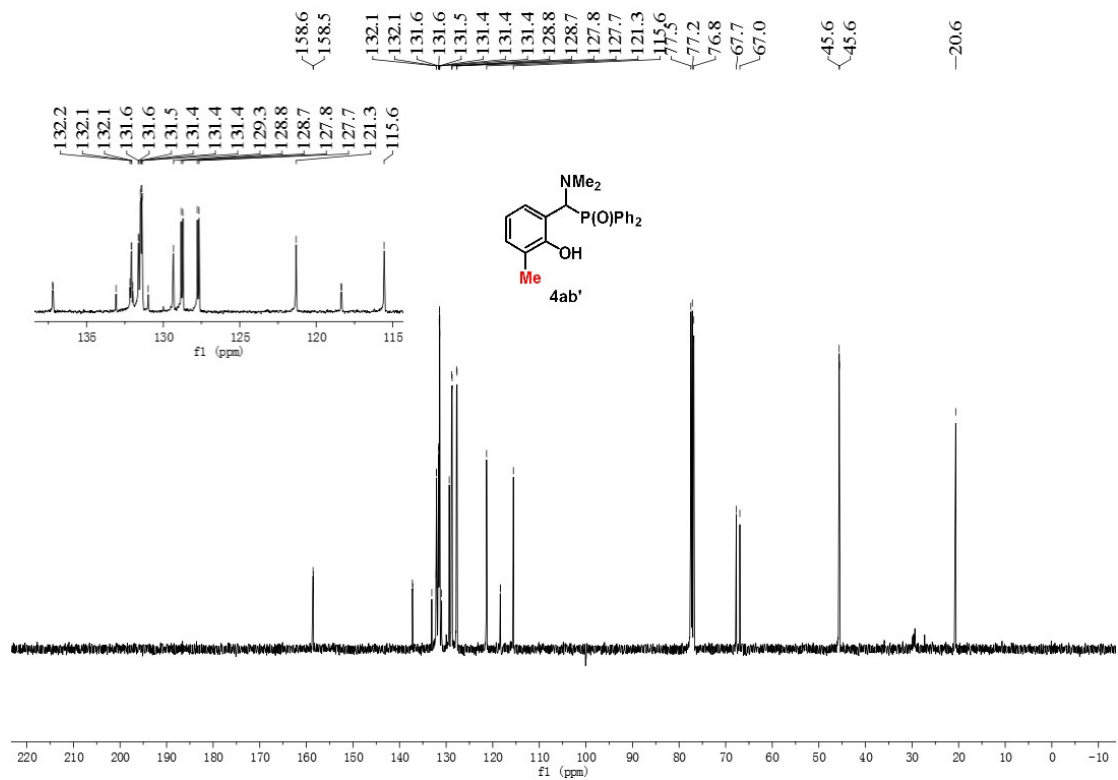

<sup>13</sup>C NMR (101 MHz, CDCl<sub>3</sub>)

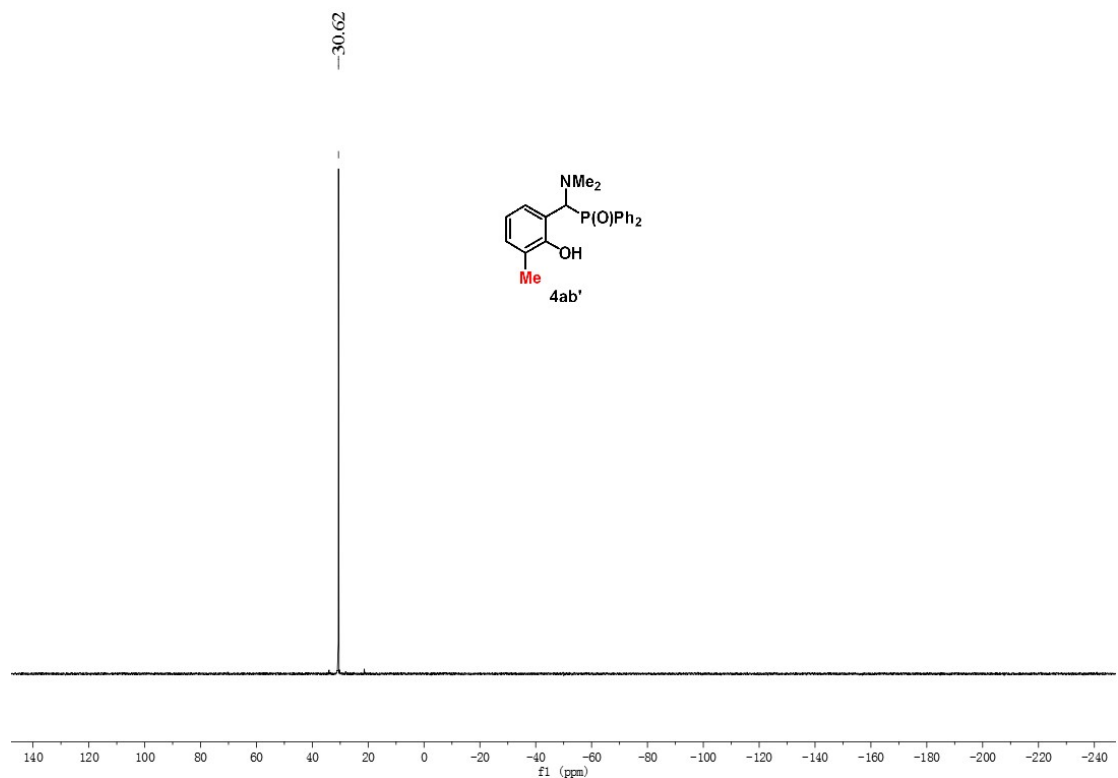

<sup>31</sup>P NMR (162 MHz, CDCl<sub>3</sub>)

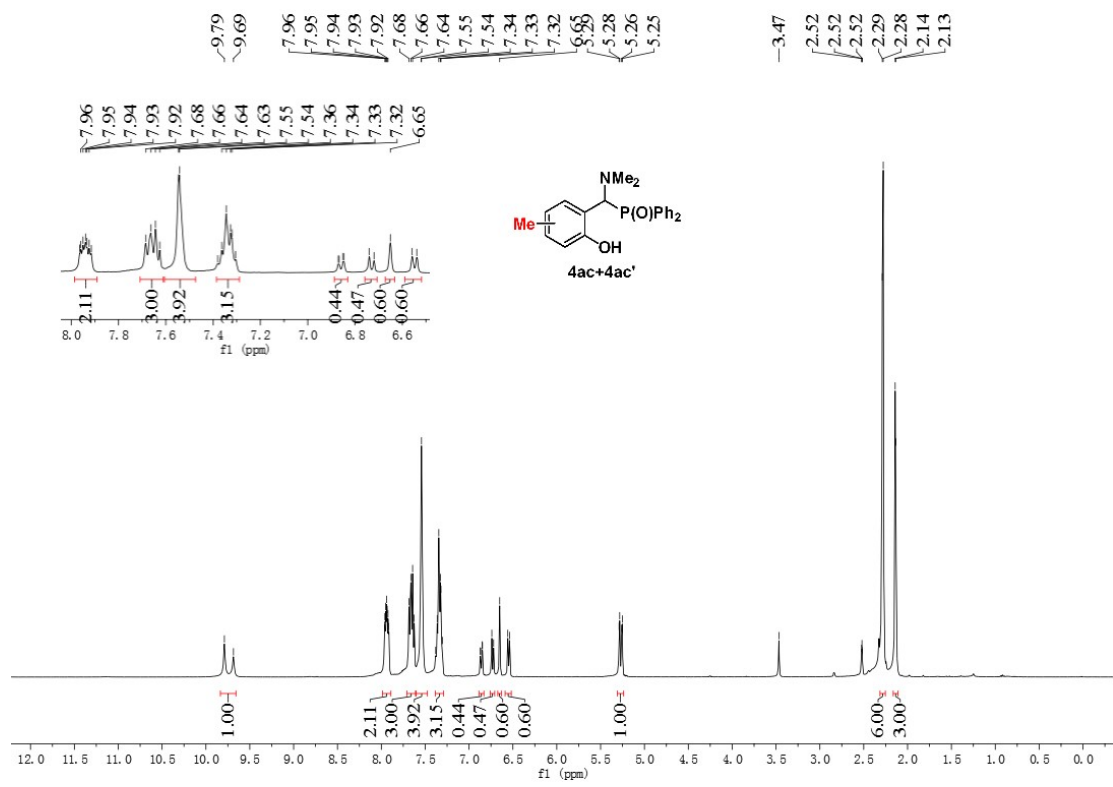

<sup>1</sup>H NMR (400 MHz, DMSO-d<sub>6</sub>)

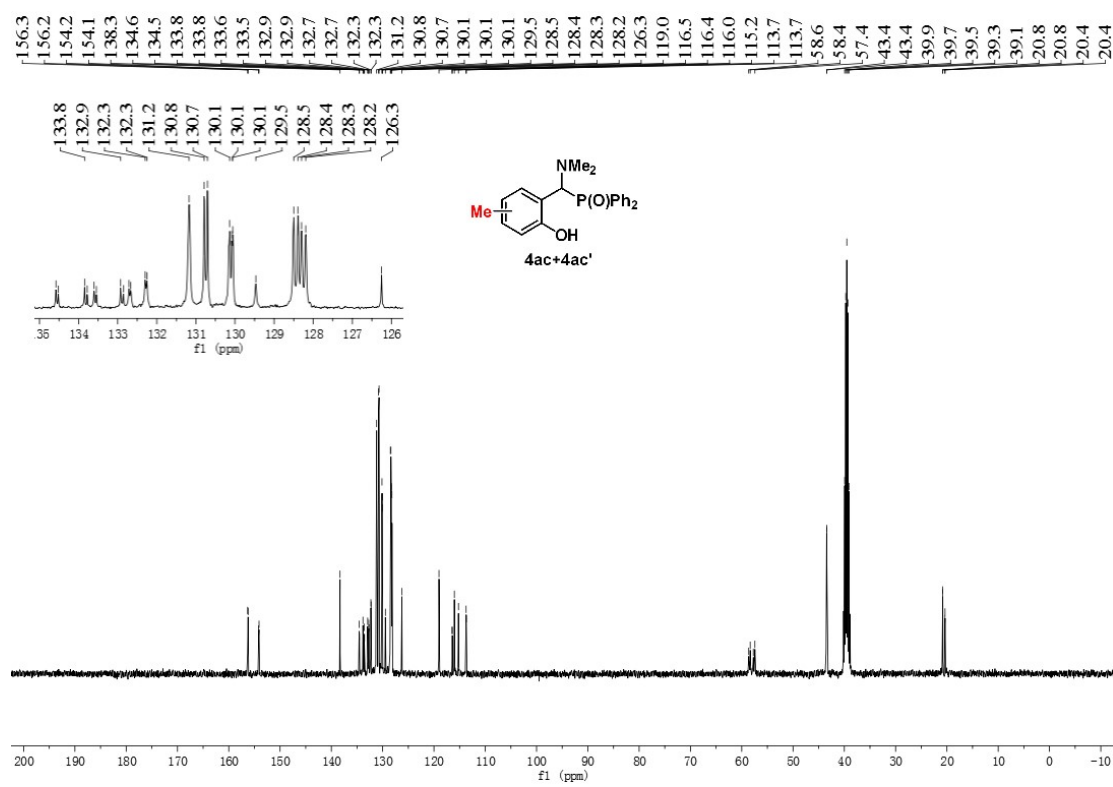

<sup>13</sup>C NMR (101 MHz, DMSO-d<sub>6</sub>)

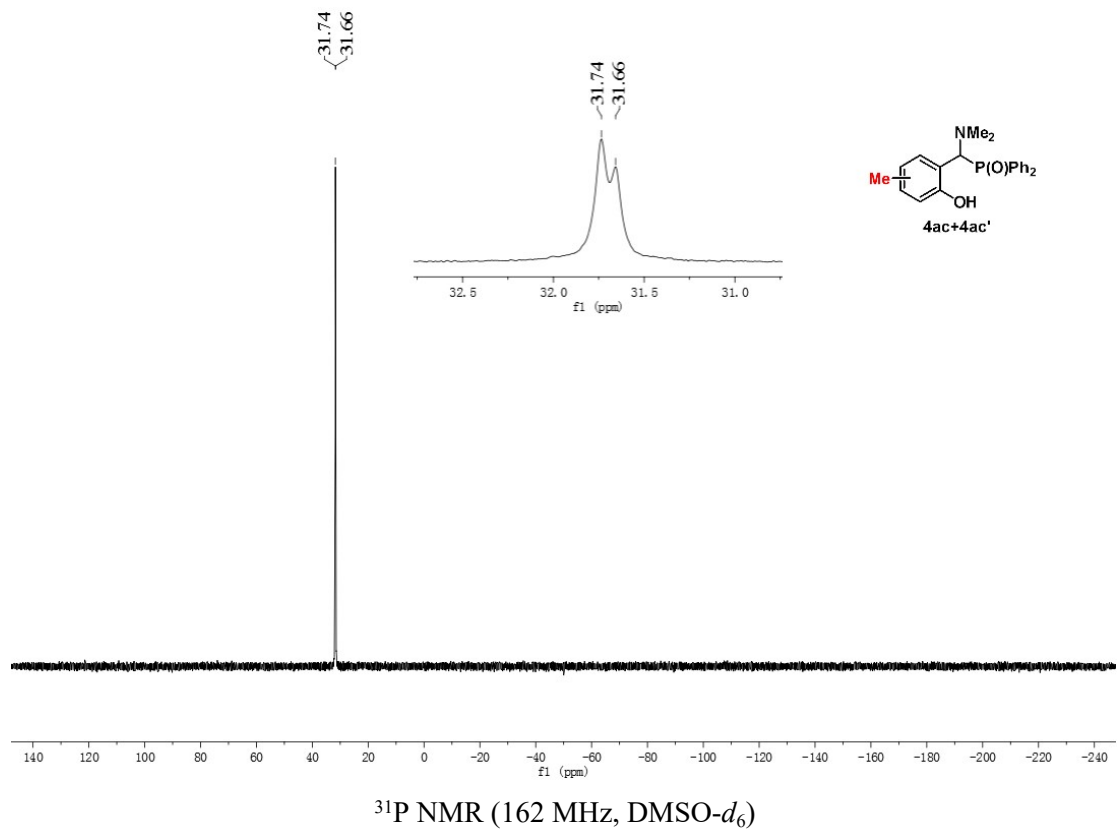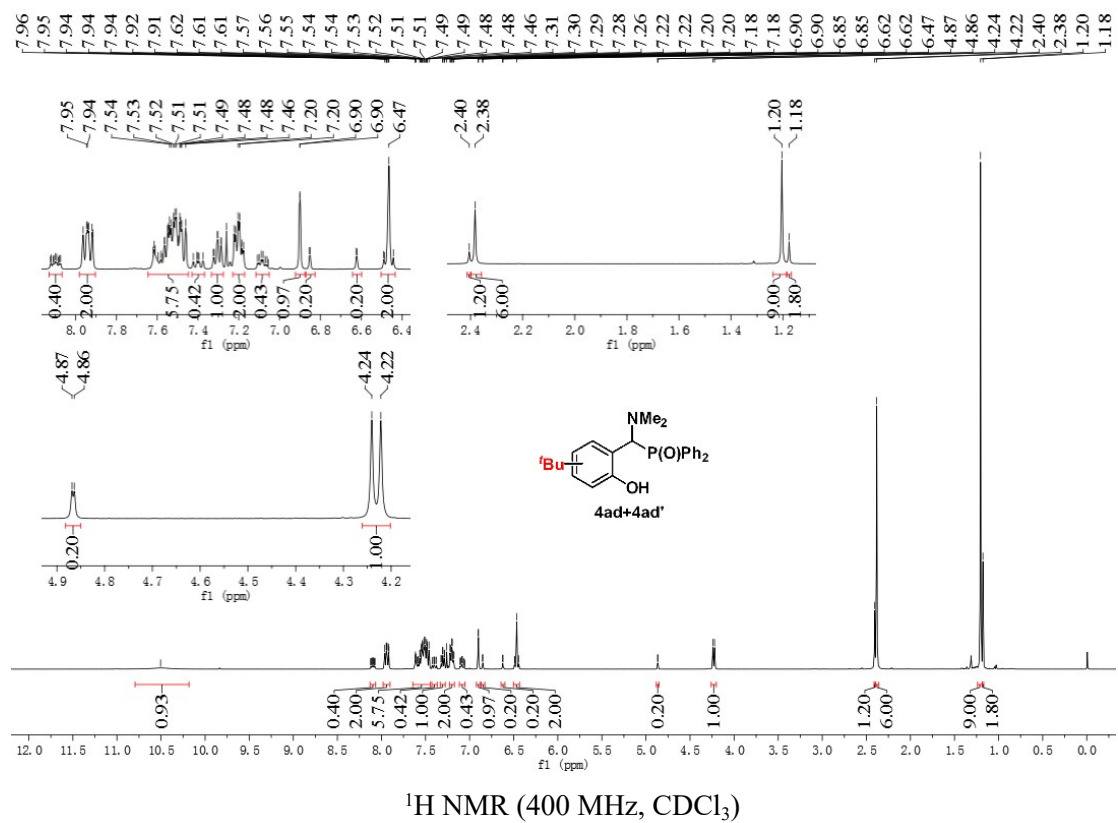

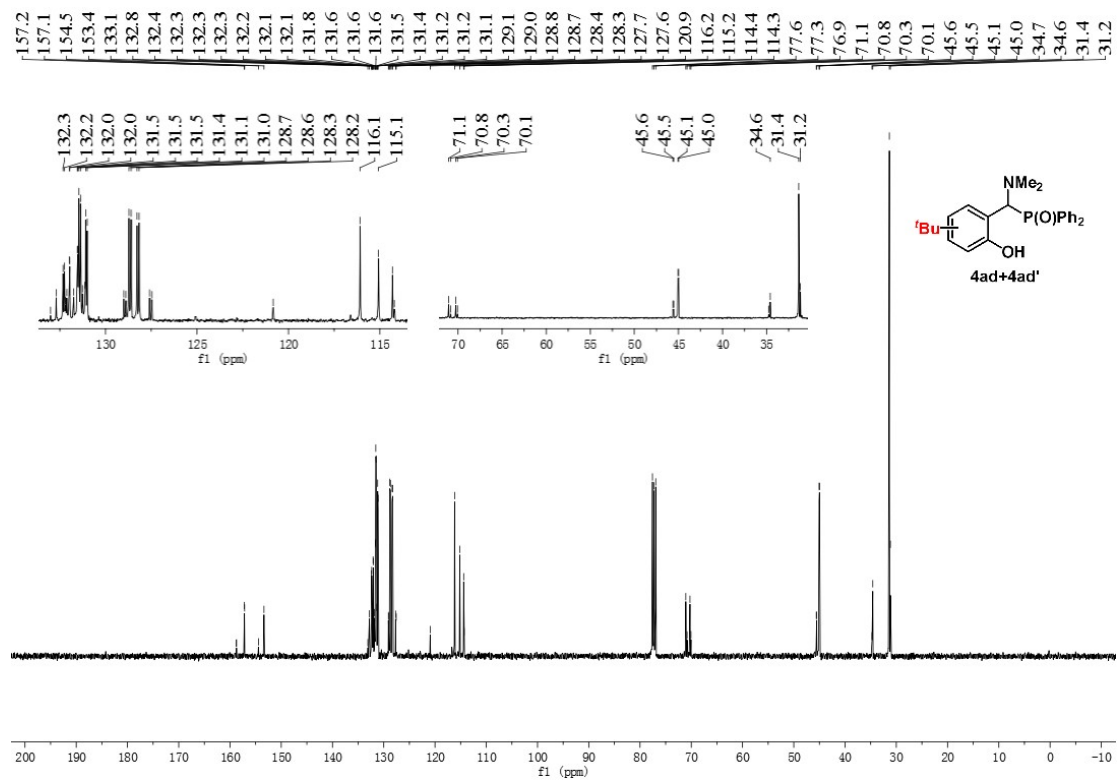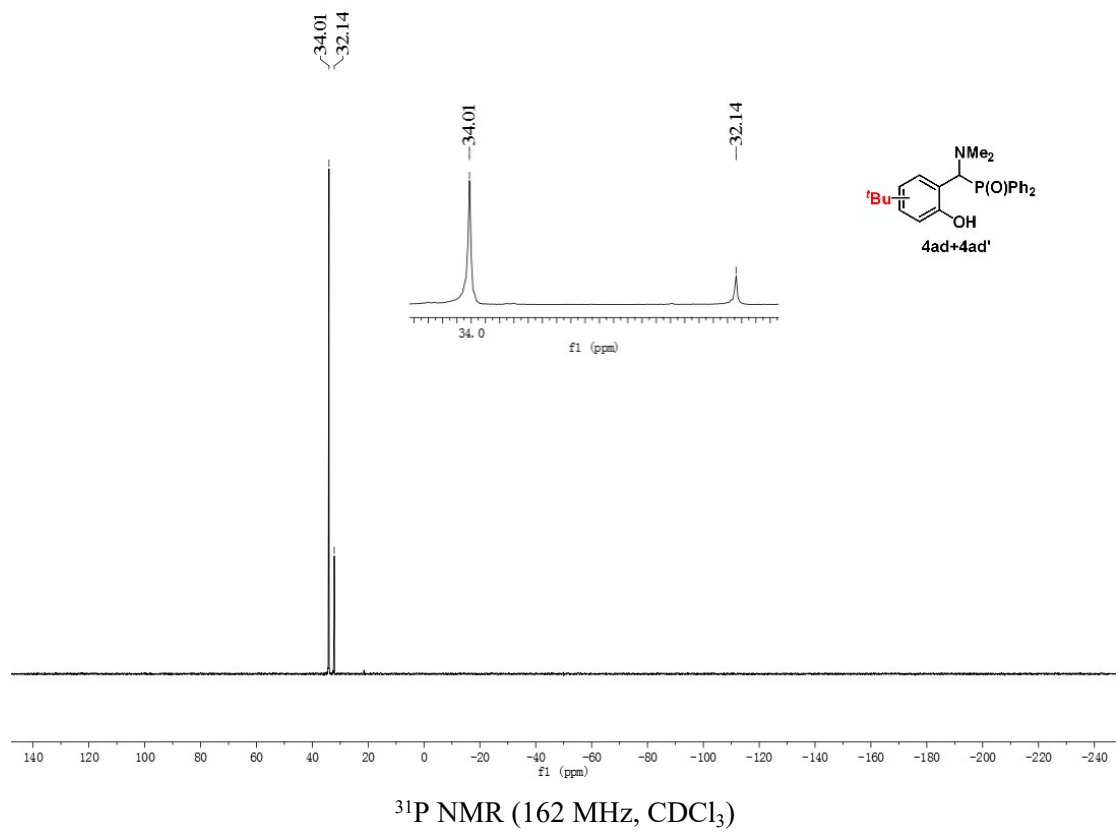

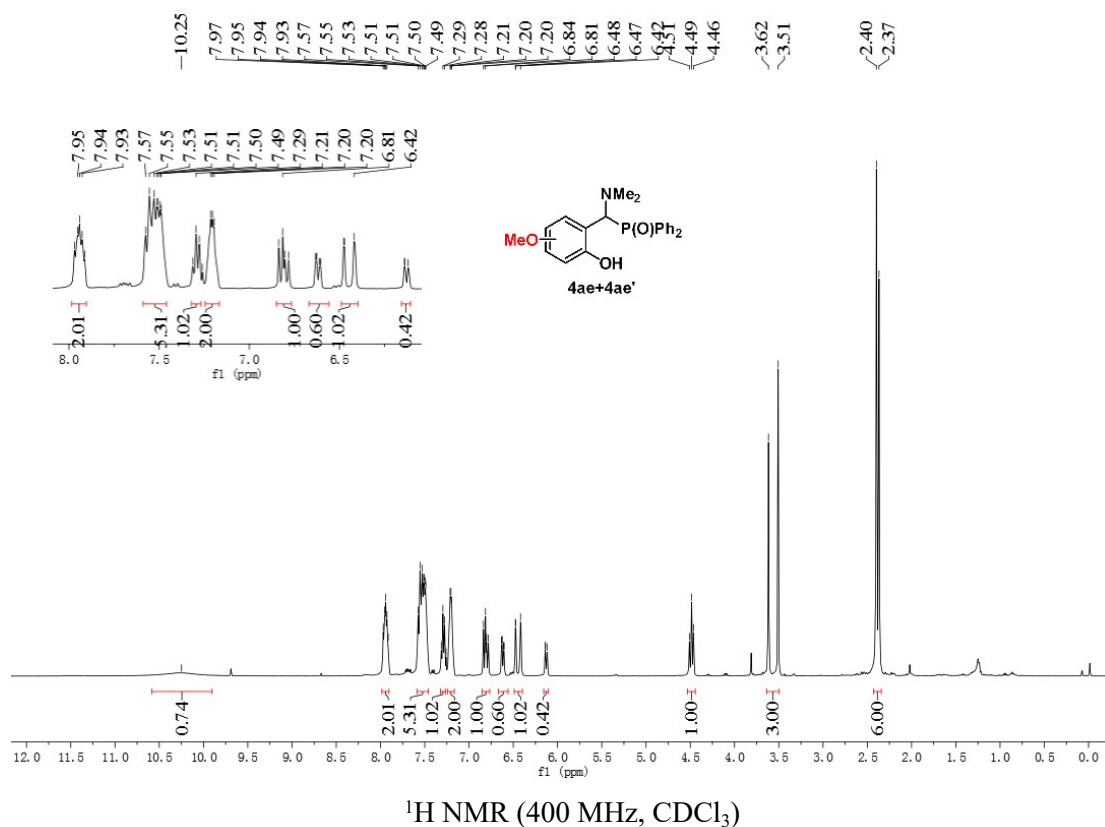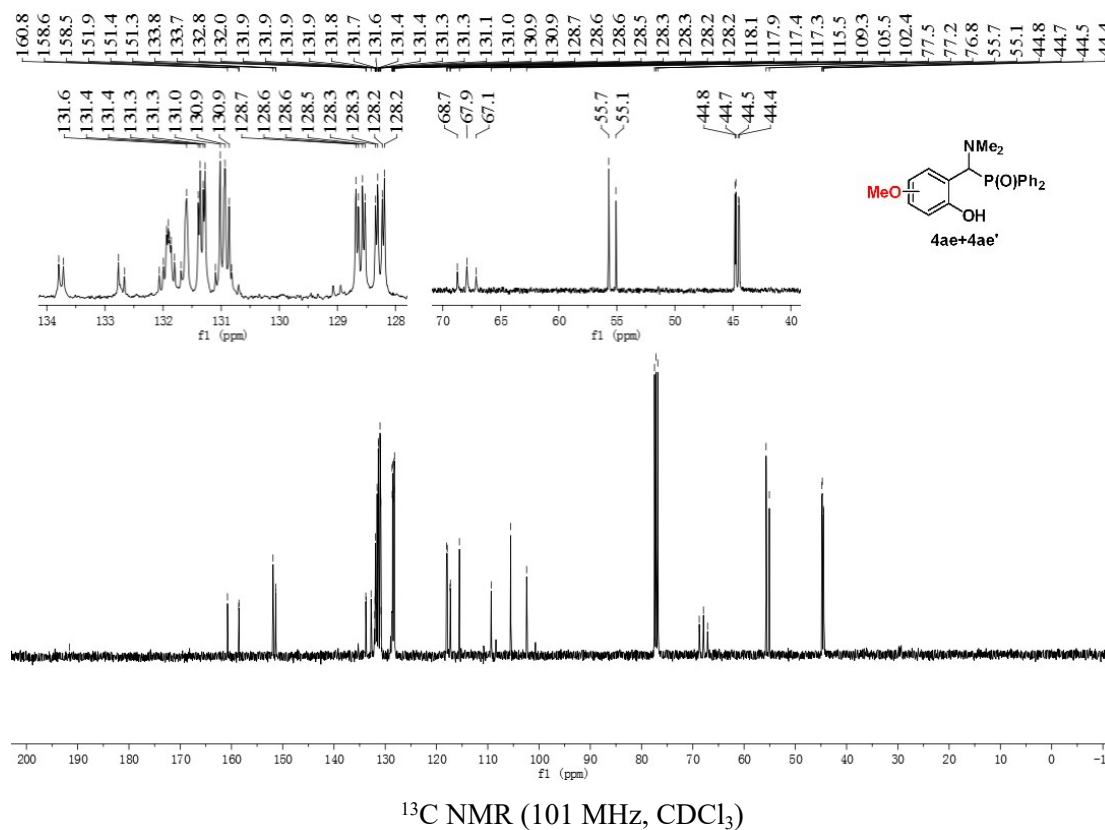

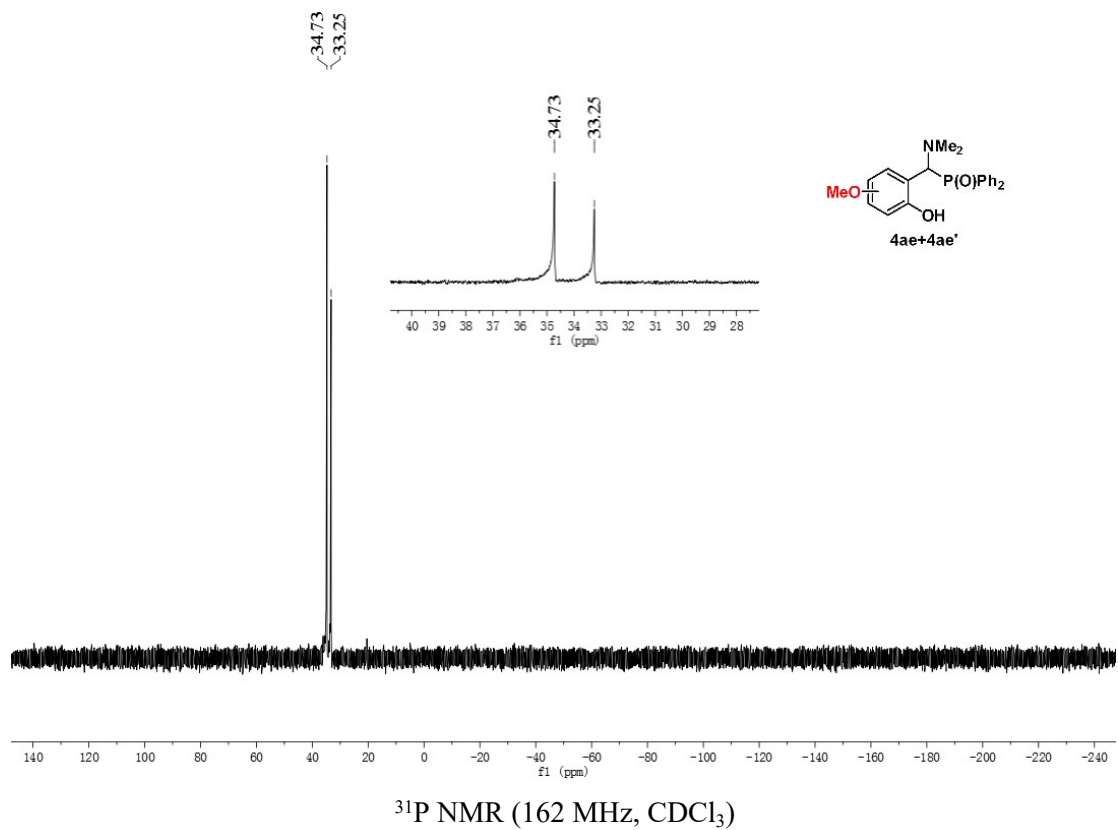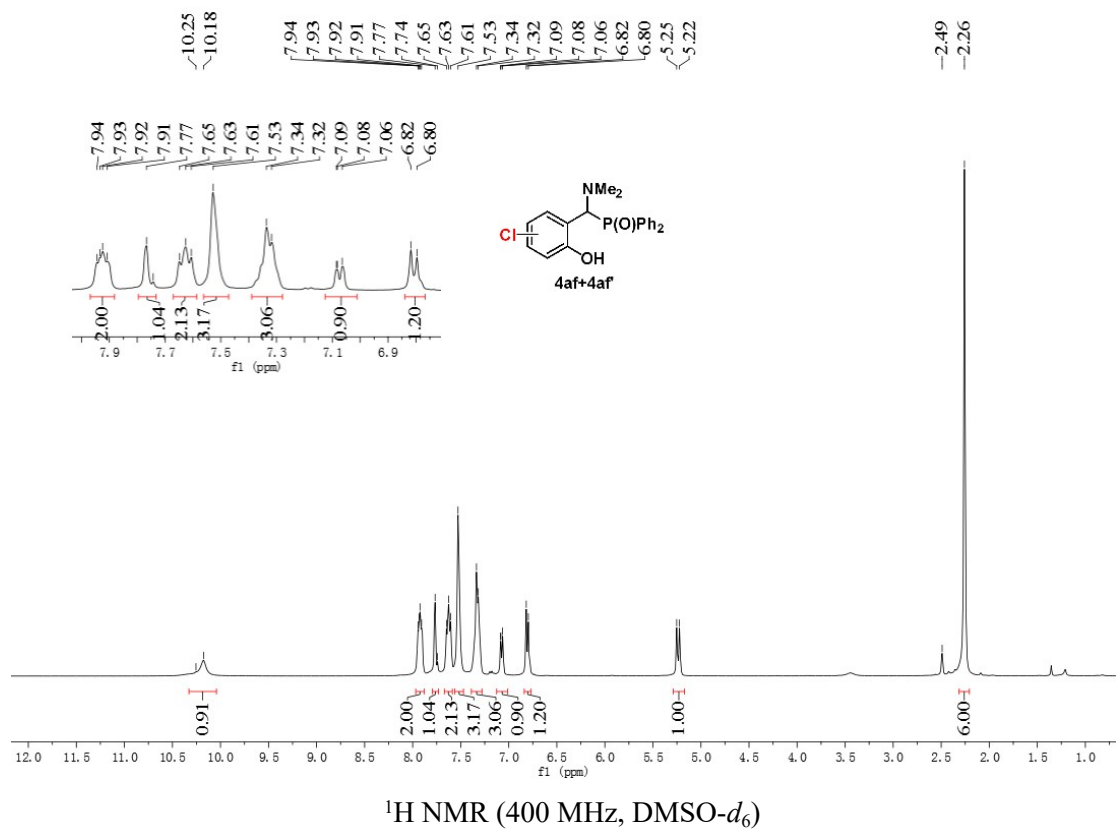



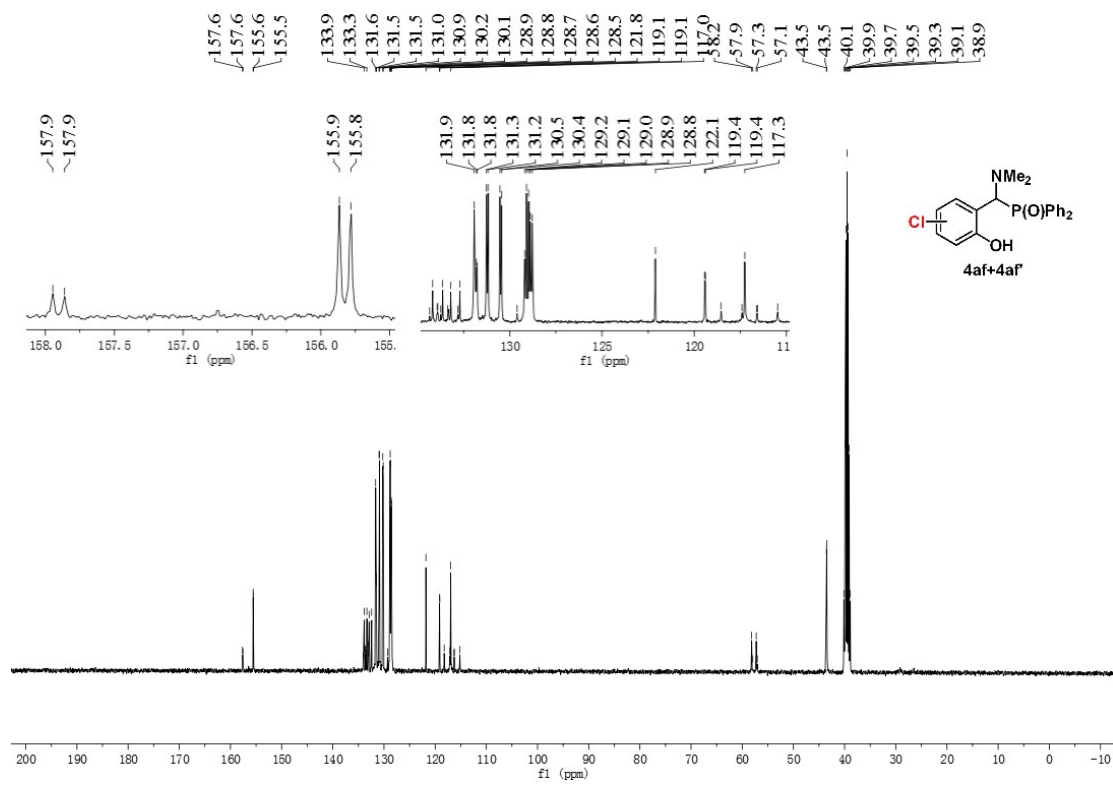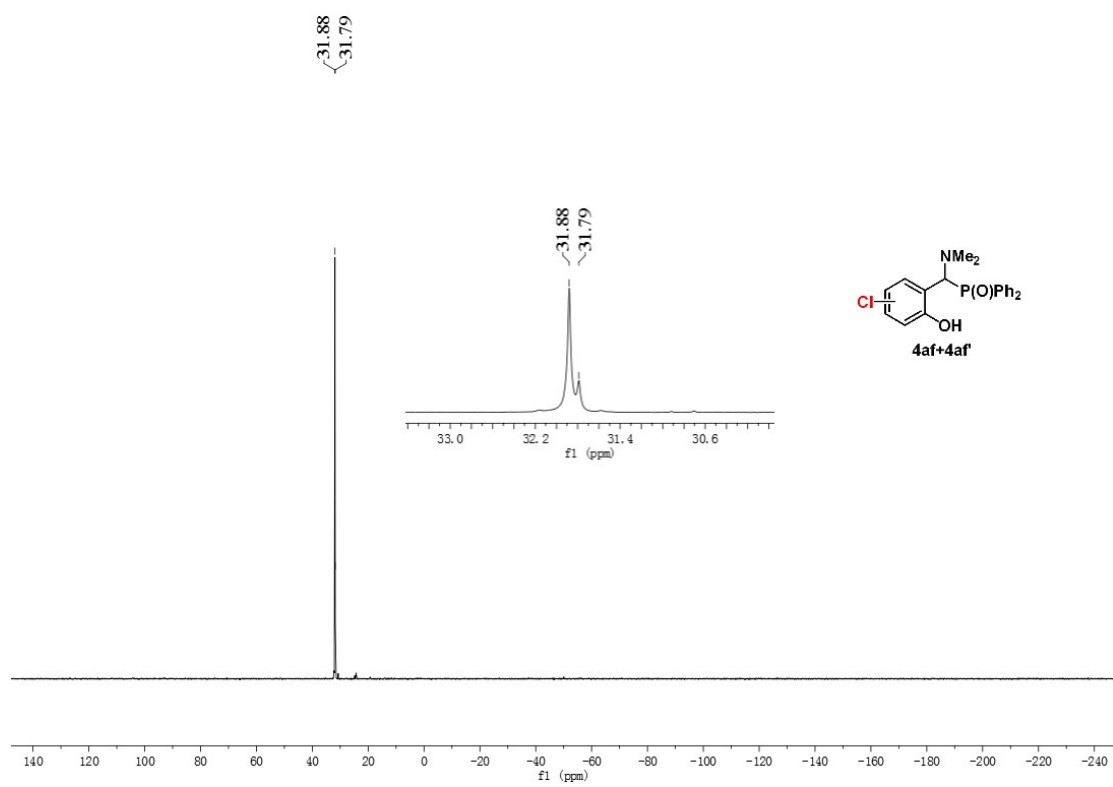

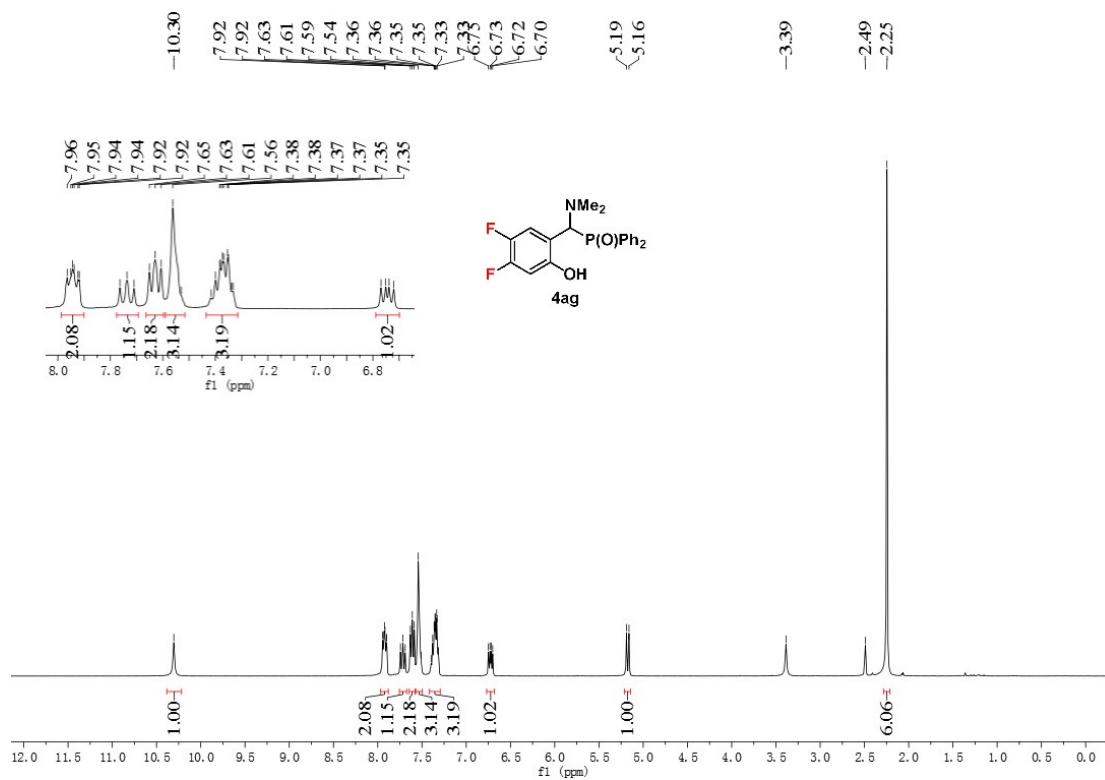

**<sup>1</sup>H NMR (400 MHz, DMSO-*d*<sub>6</sub>)**

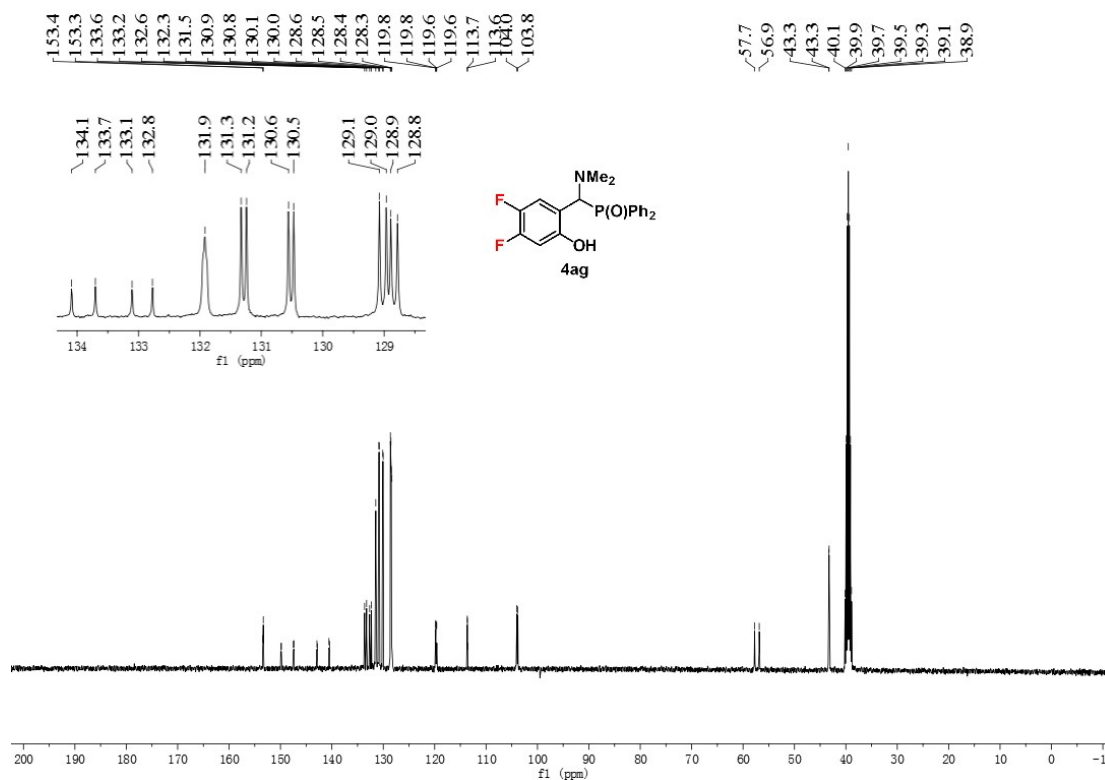

**<sup>13</sup>C NMR (101 MHz, DMSO-*d*<sub>6</sub>)**

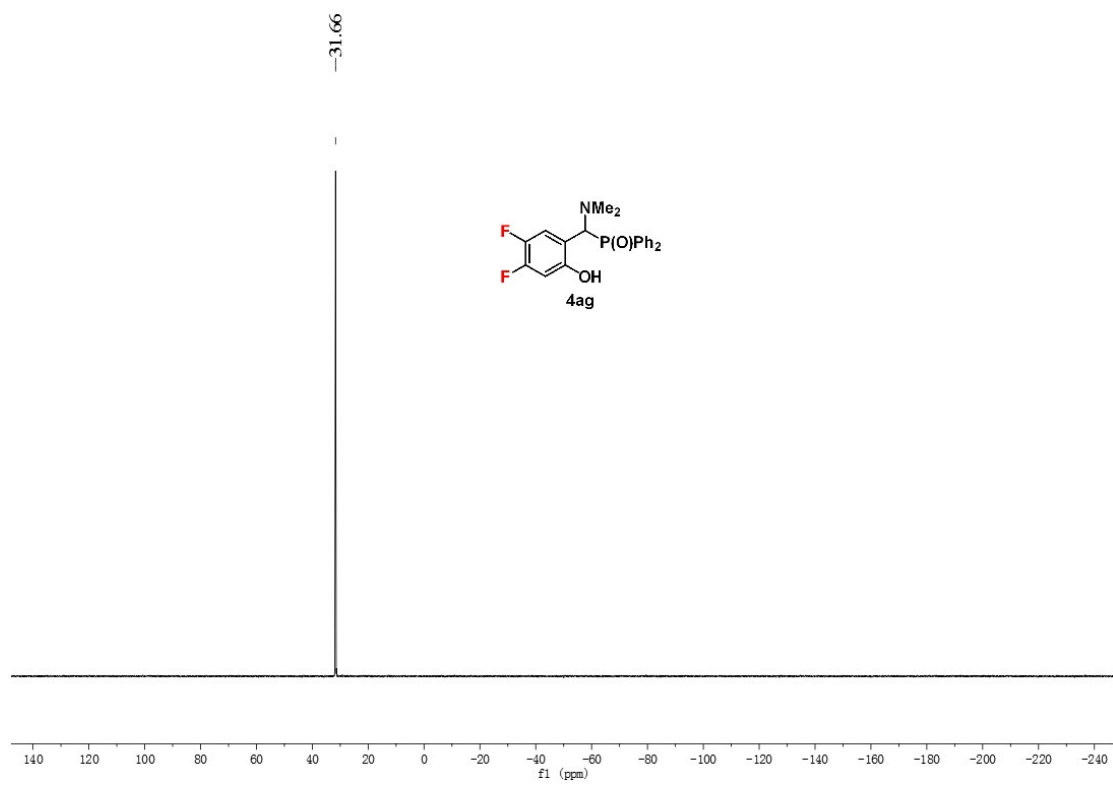

<sup>31</sup>P NMR (162 MHz, DMSO-*d*<sub>6</sub>)

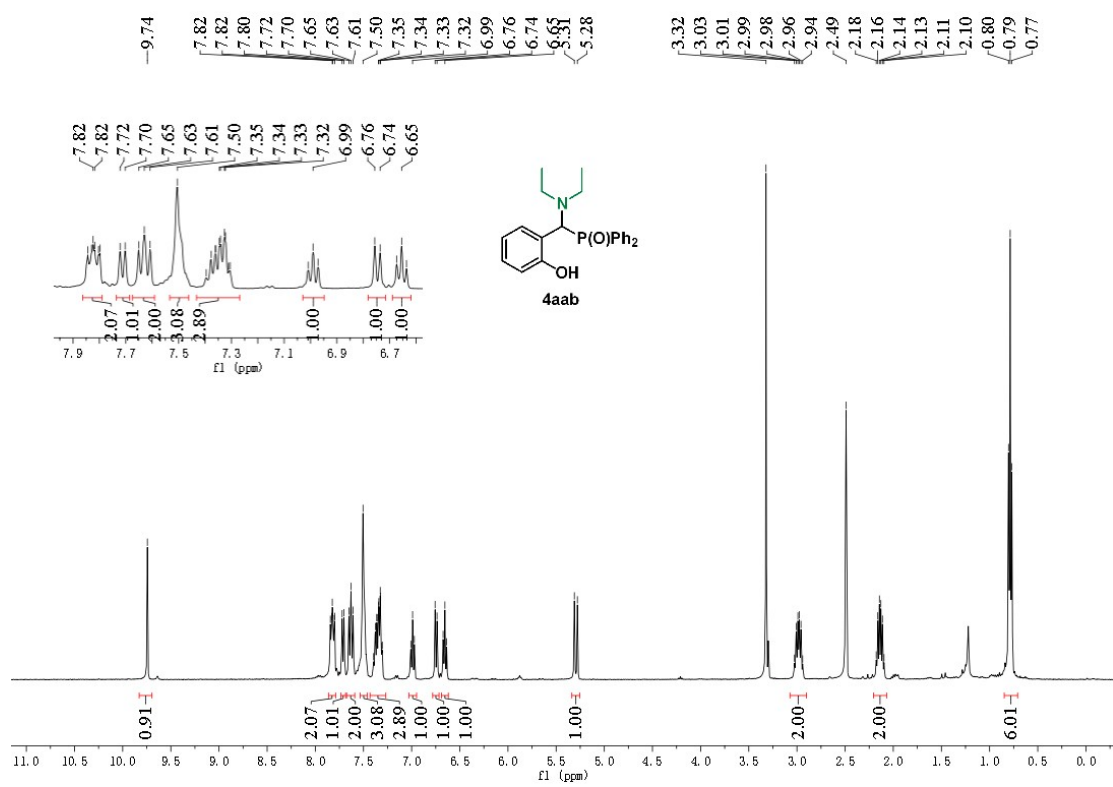

<sup>1</sup>H NMR (400 MHz, DMSO-*d*<sub>6</sub>)

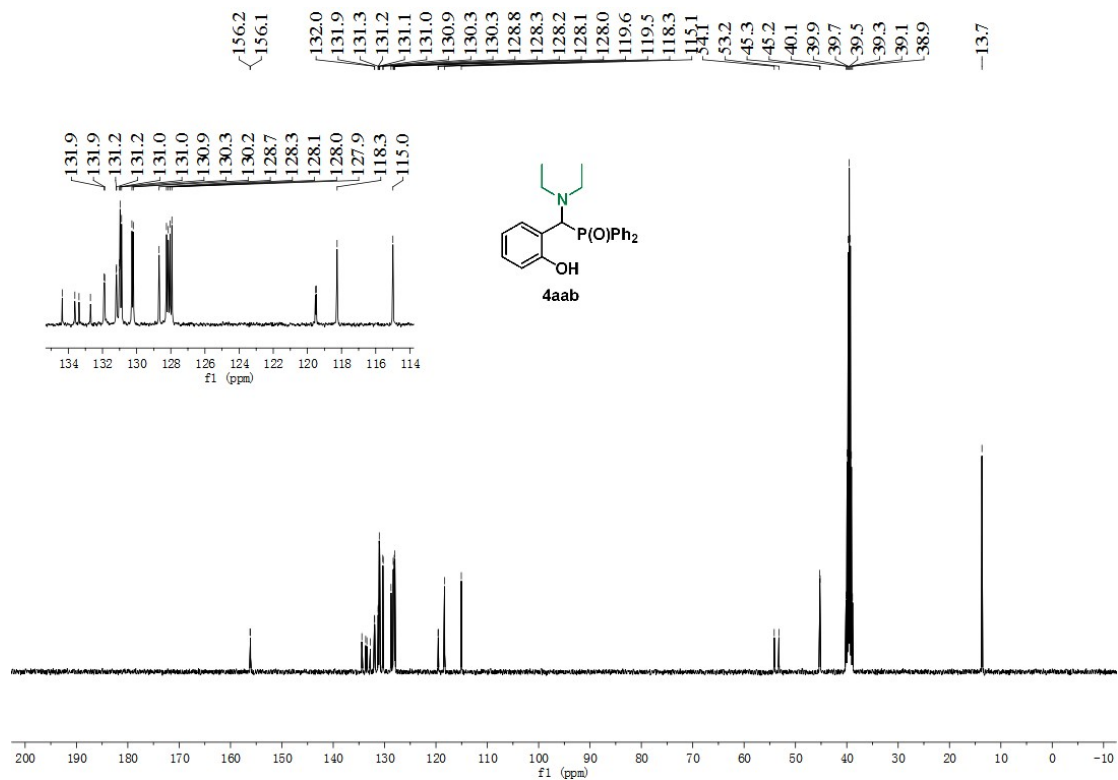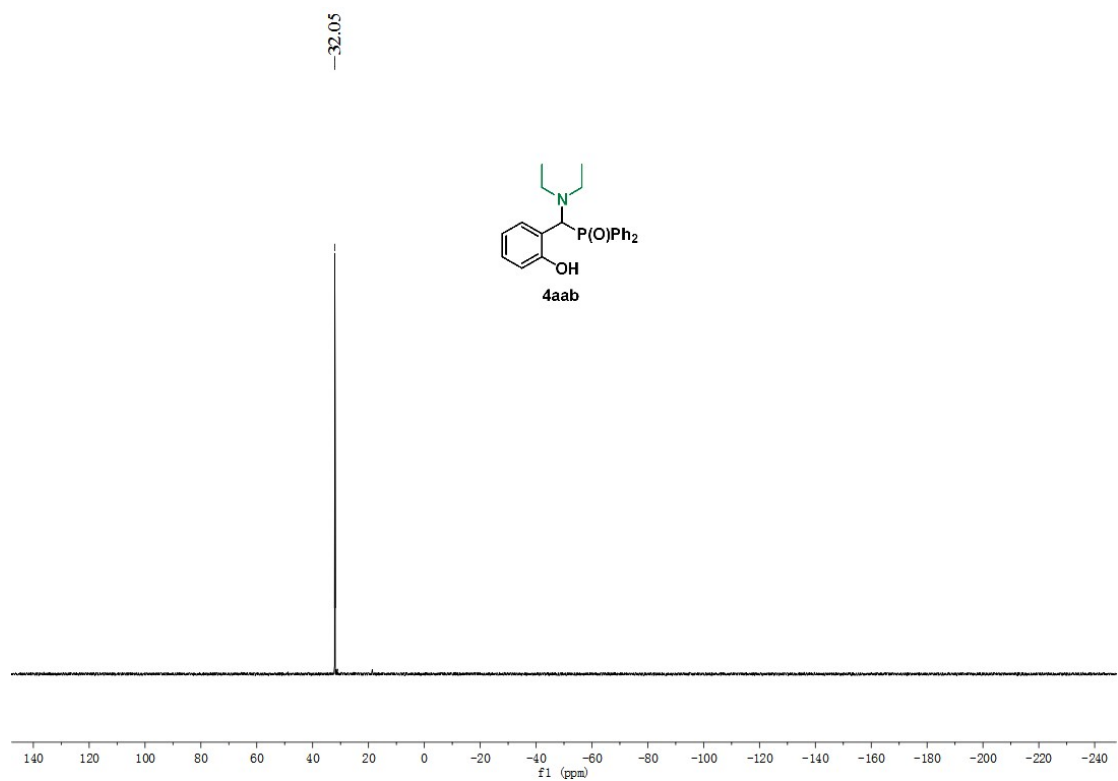

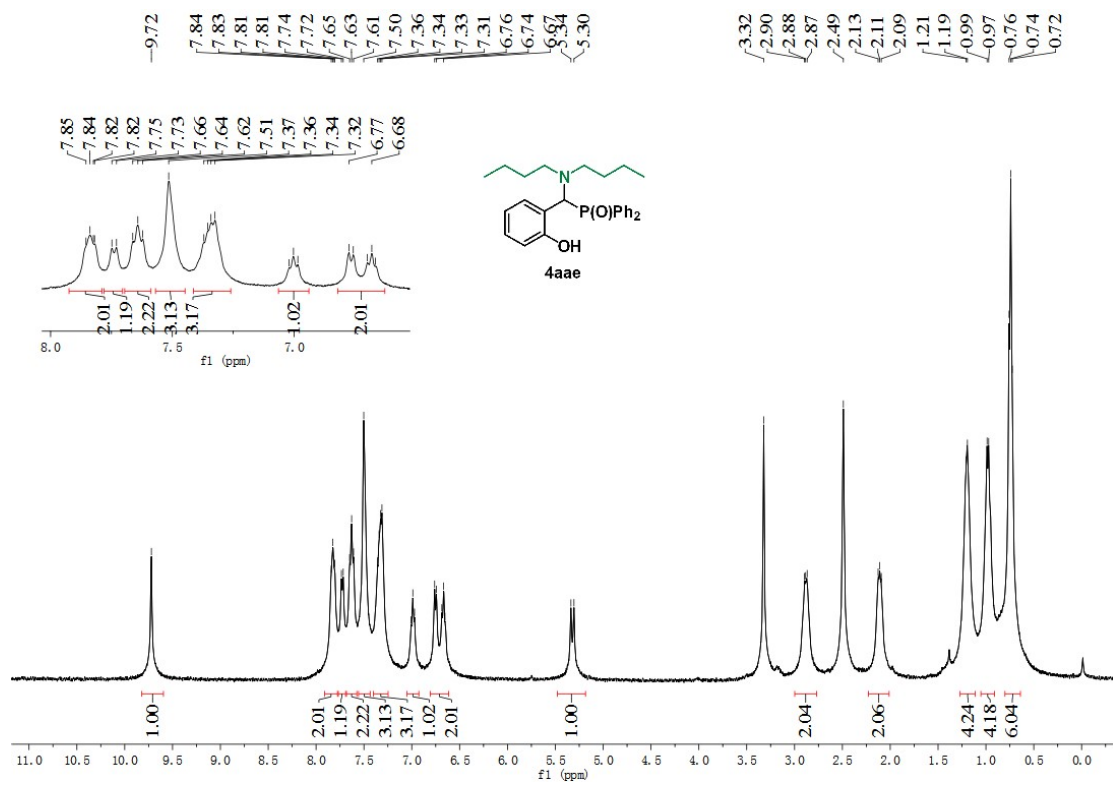

<sup>1</sup>H NMR (400 MHz, DMSO-*d*<sub>6</sub>)

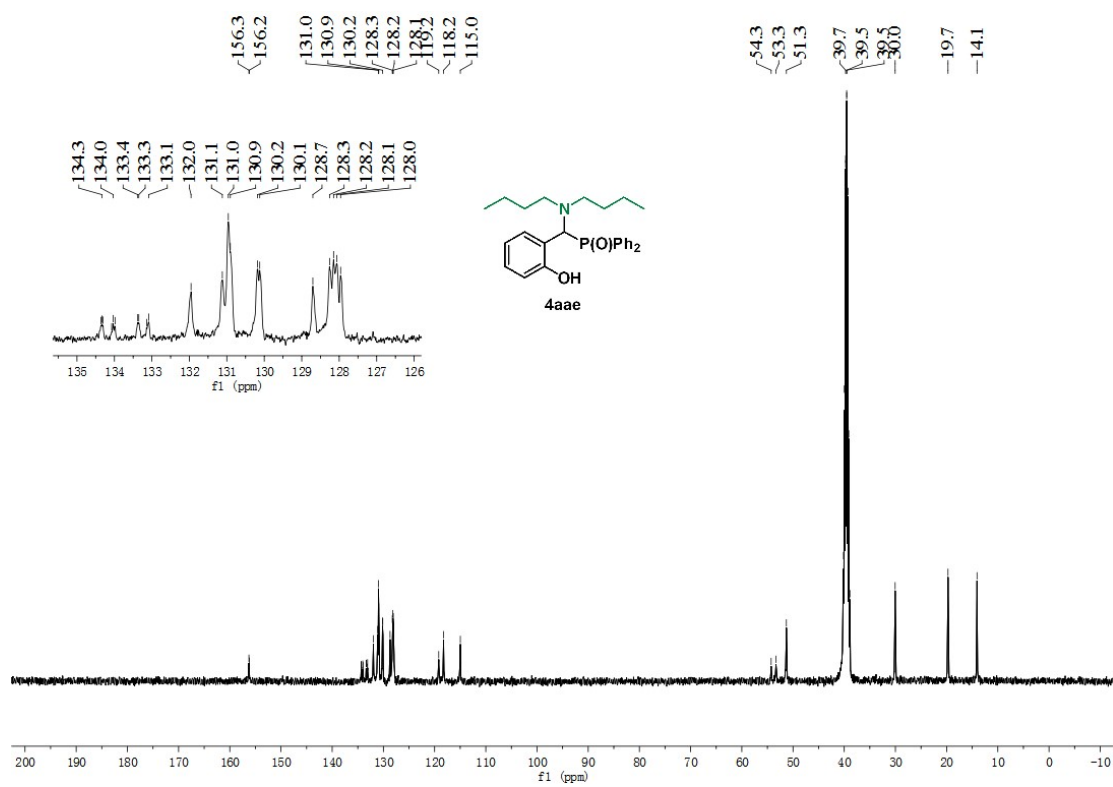

<sup>13</sup>C NMR (101 MHz, DMSO-*d*<sub>6</sub>)

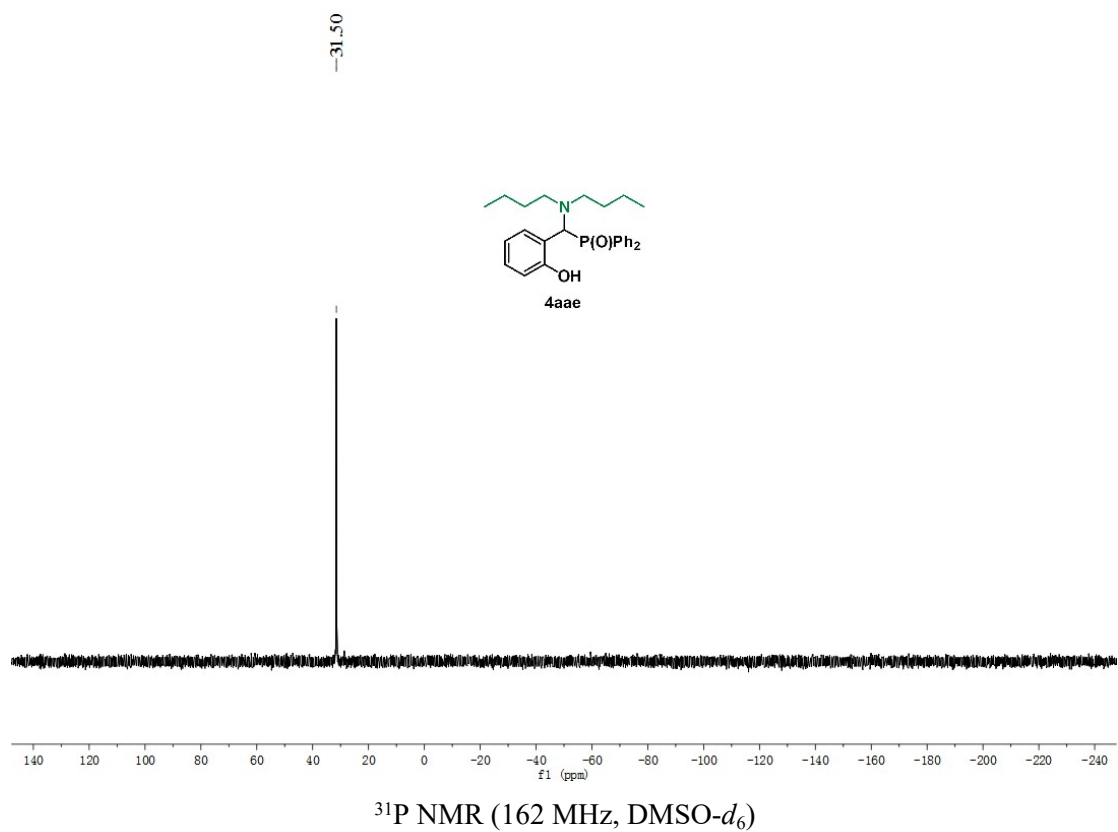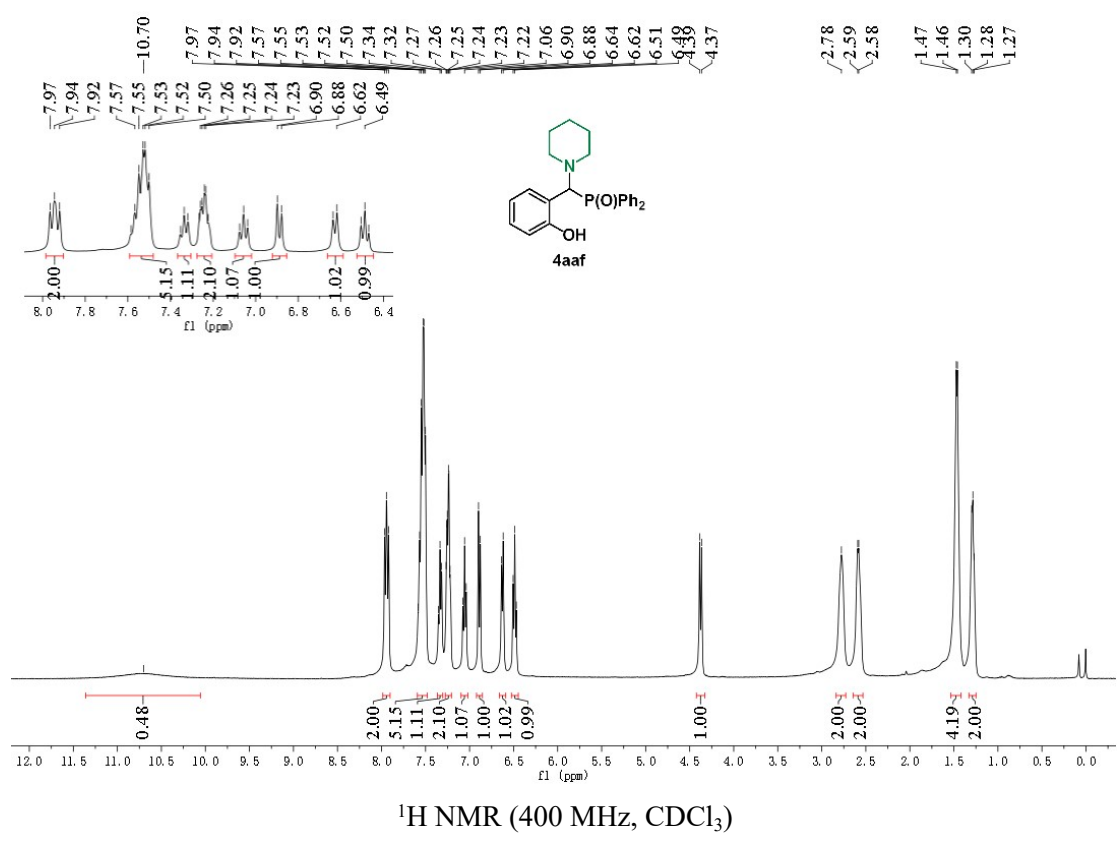

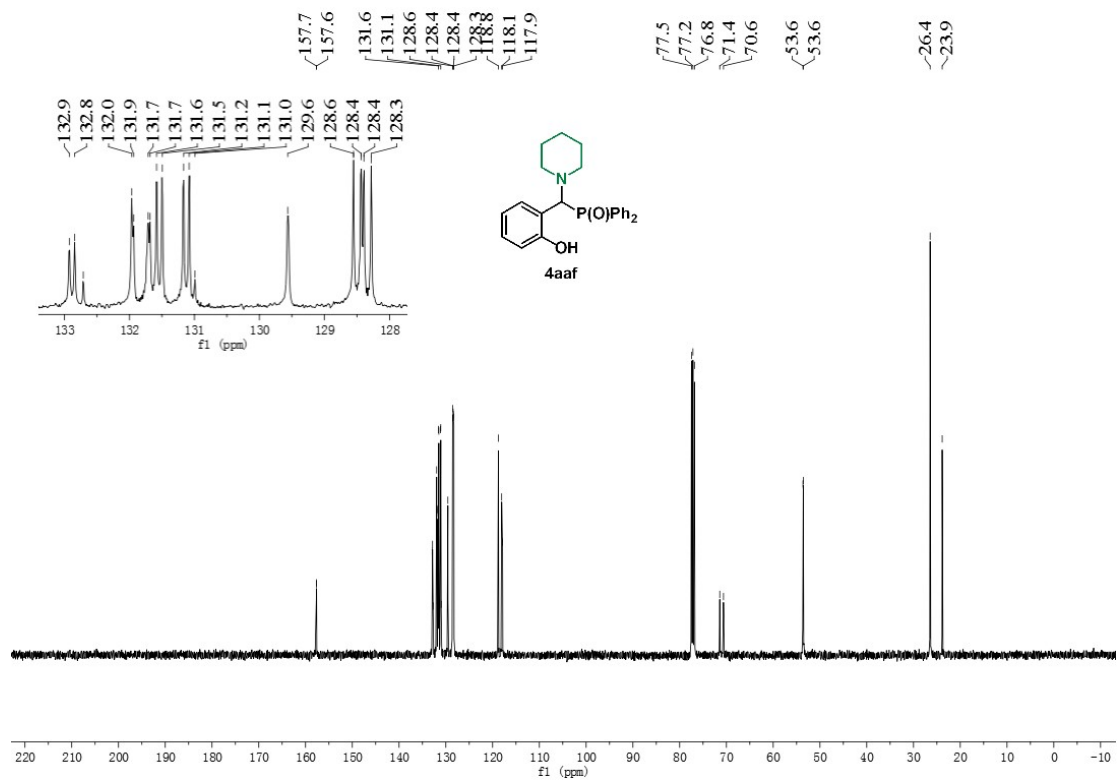

$^{13}\text{C}$  NMR (101 MHz,  $\text{CDCl}_3$ )

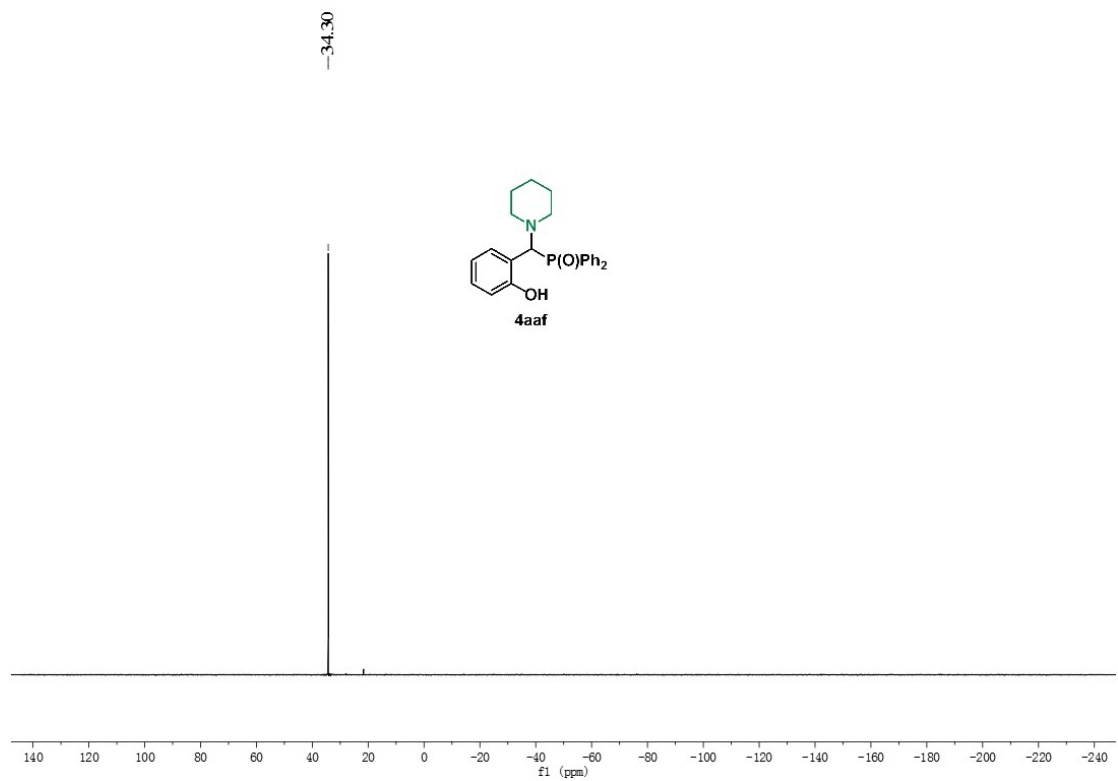

$^{31}\text{P}$  NMR (162 MHz,  $\text{CDCl}_3$ )

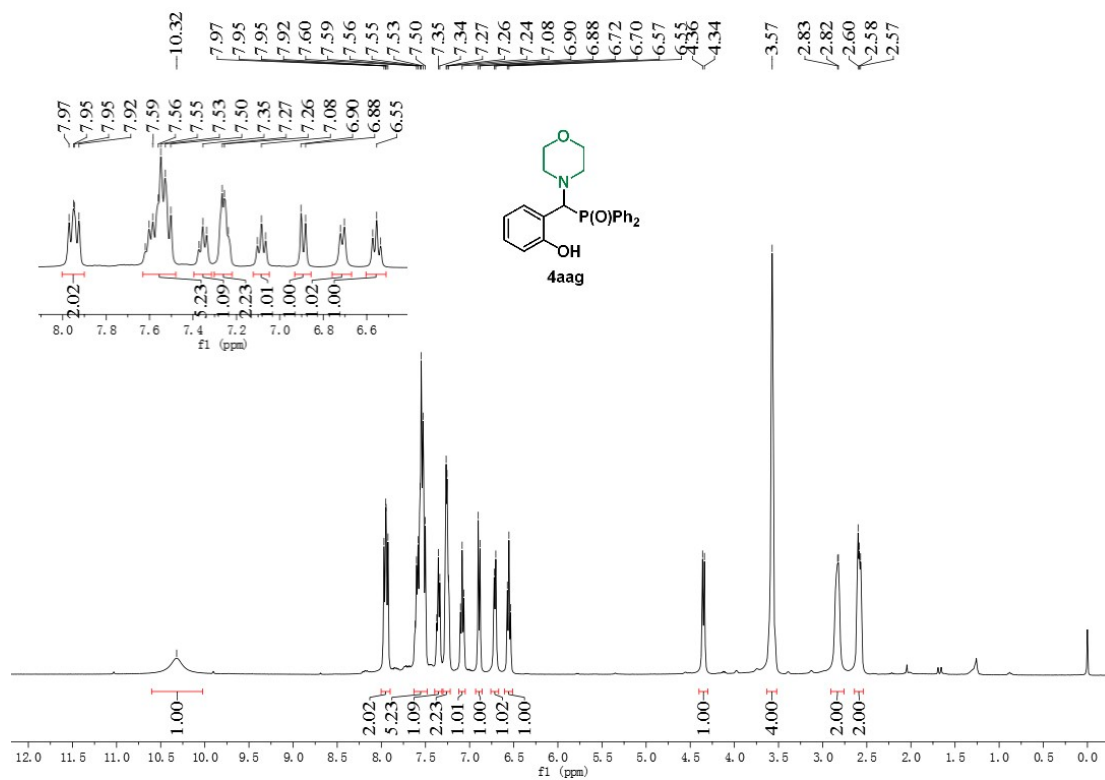

<sup>1</sup>H NMR (400 MHz, CDCl<sub>3</sub>)

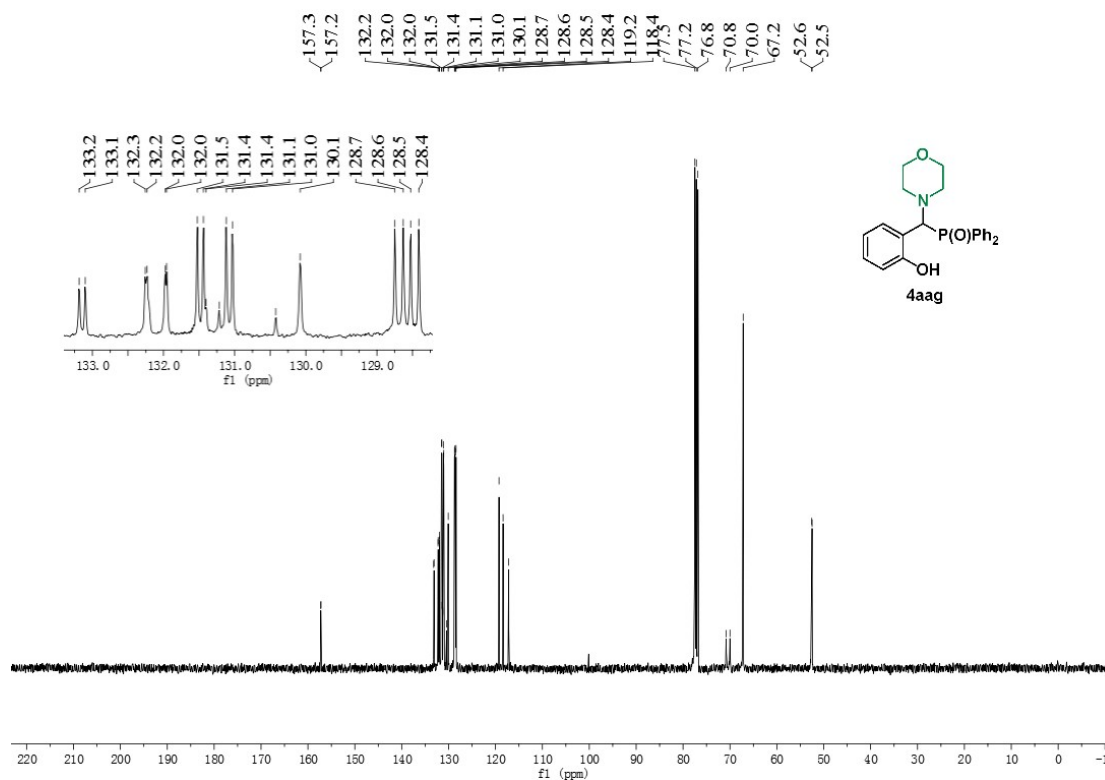

<sup>13</sup>C NMR (101 MHz, CDCl<sub>3</sub>)



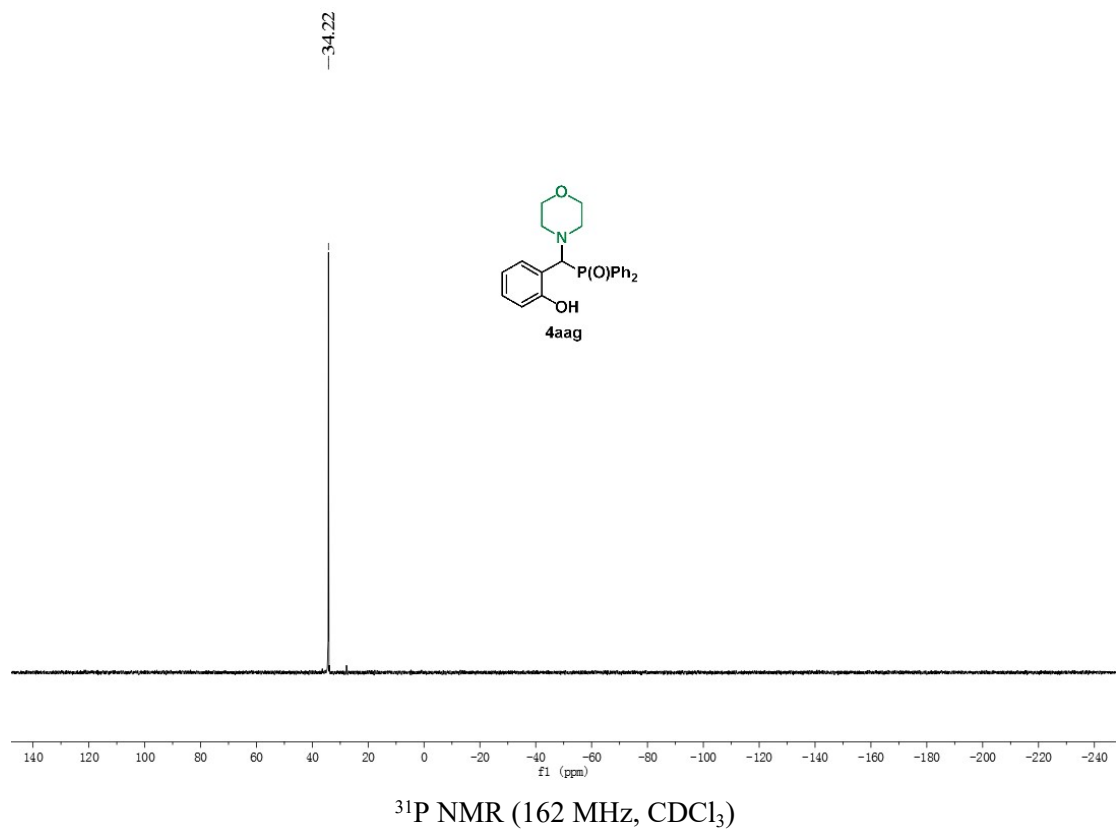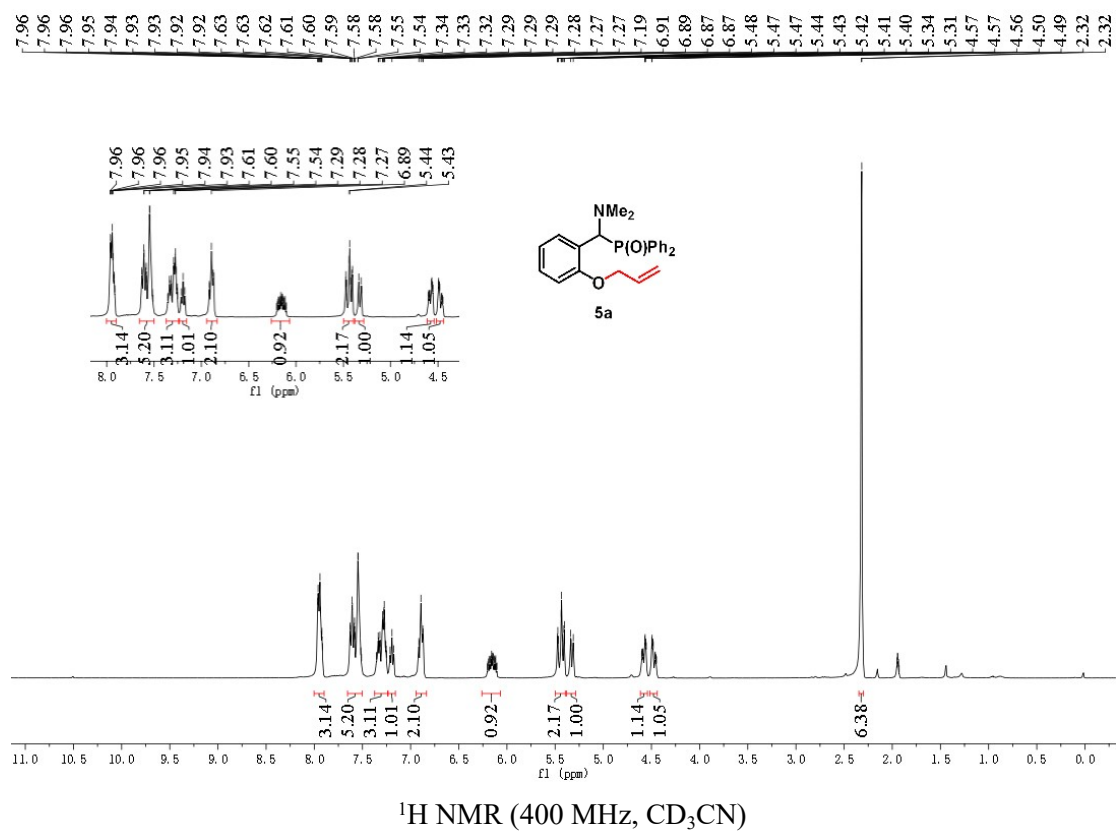

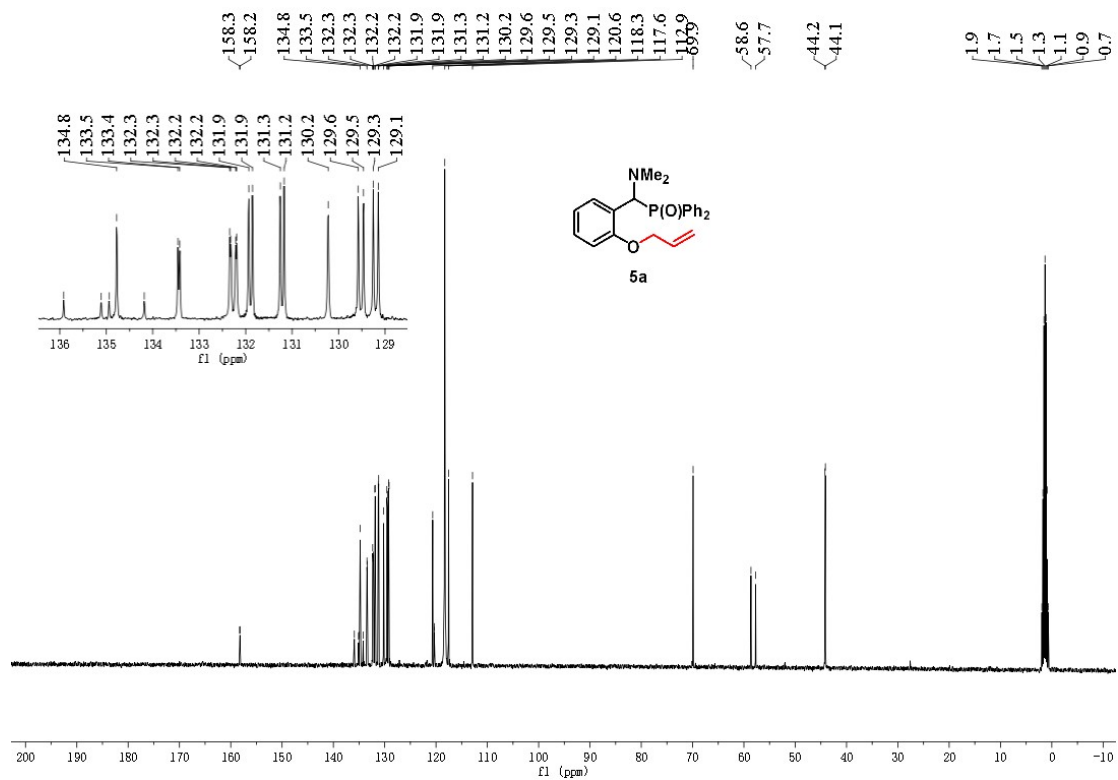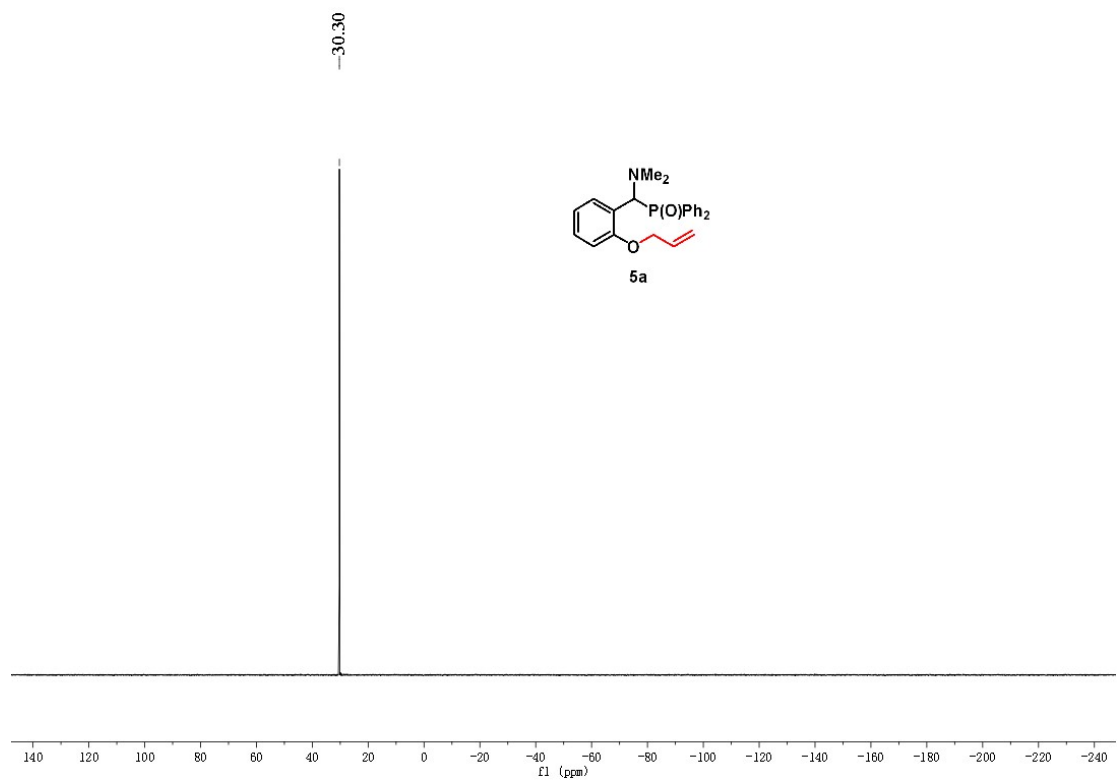

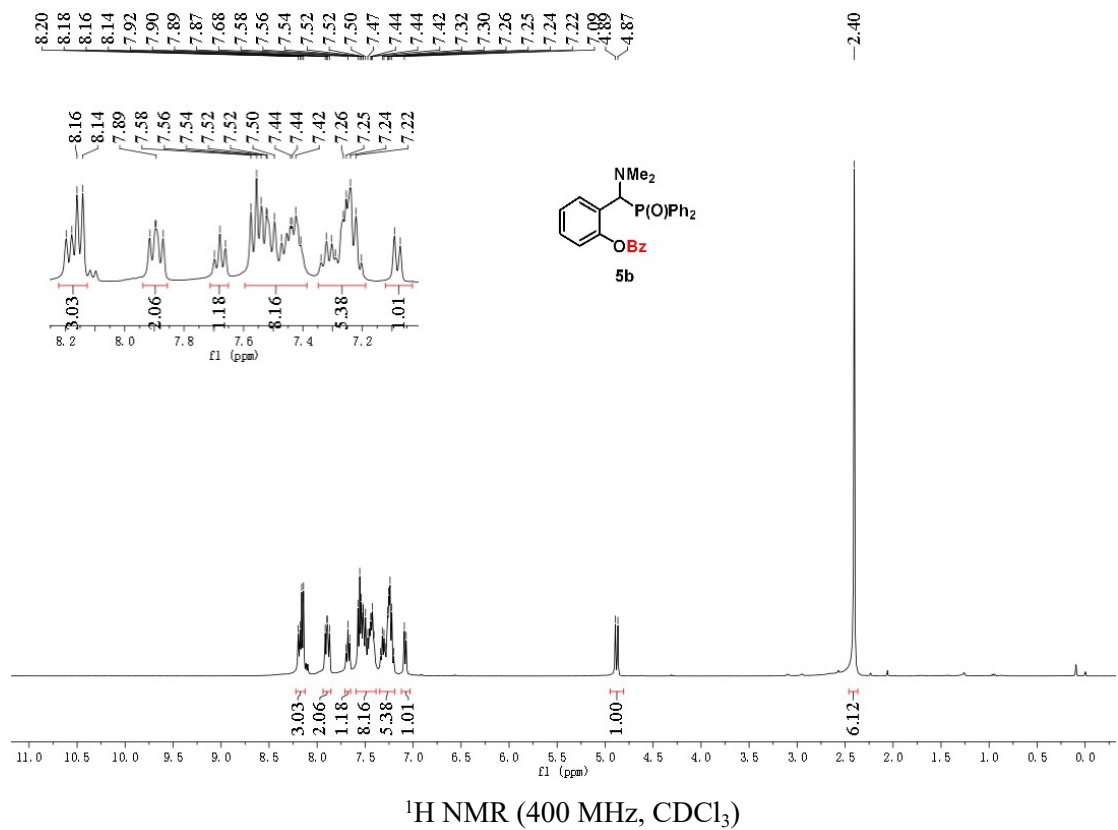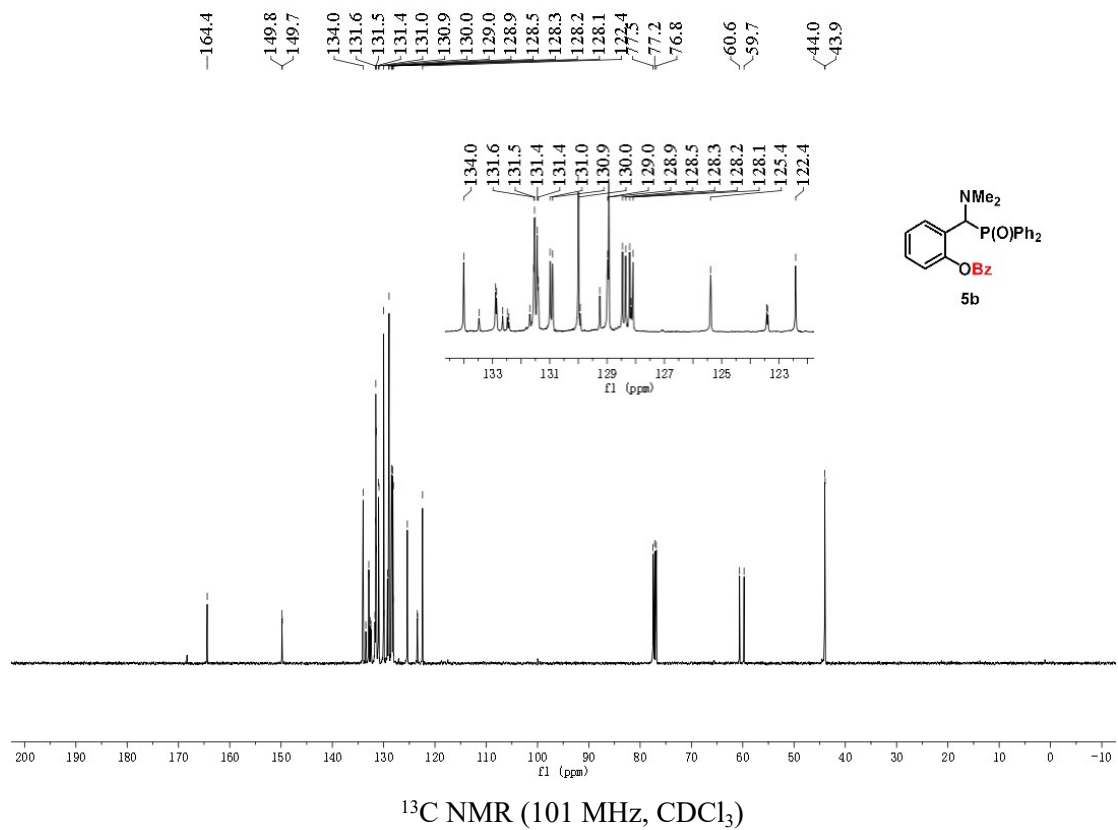

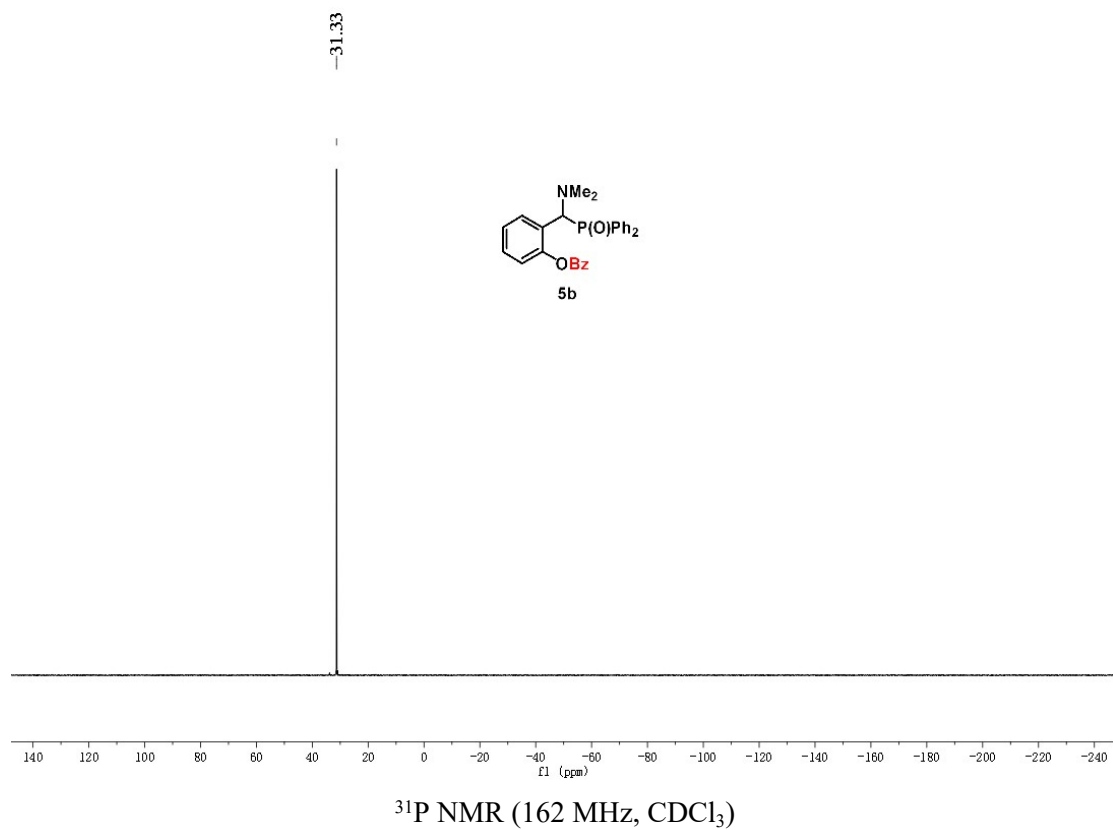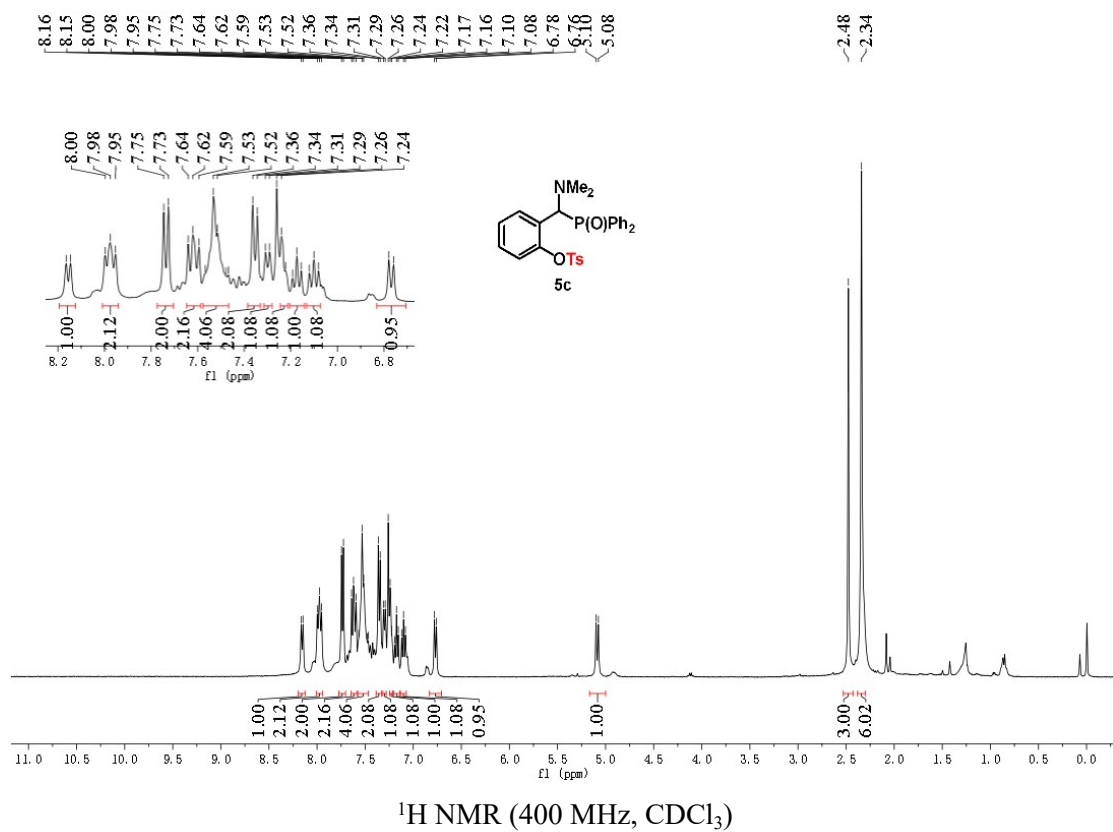

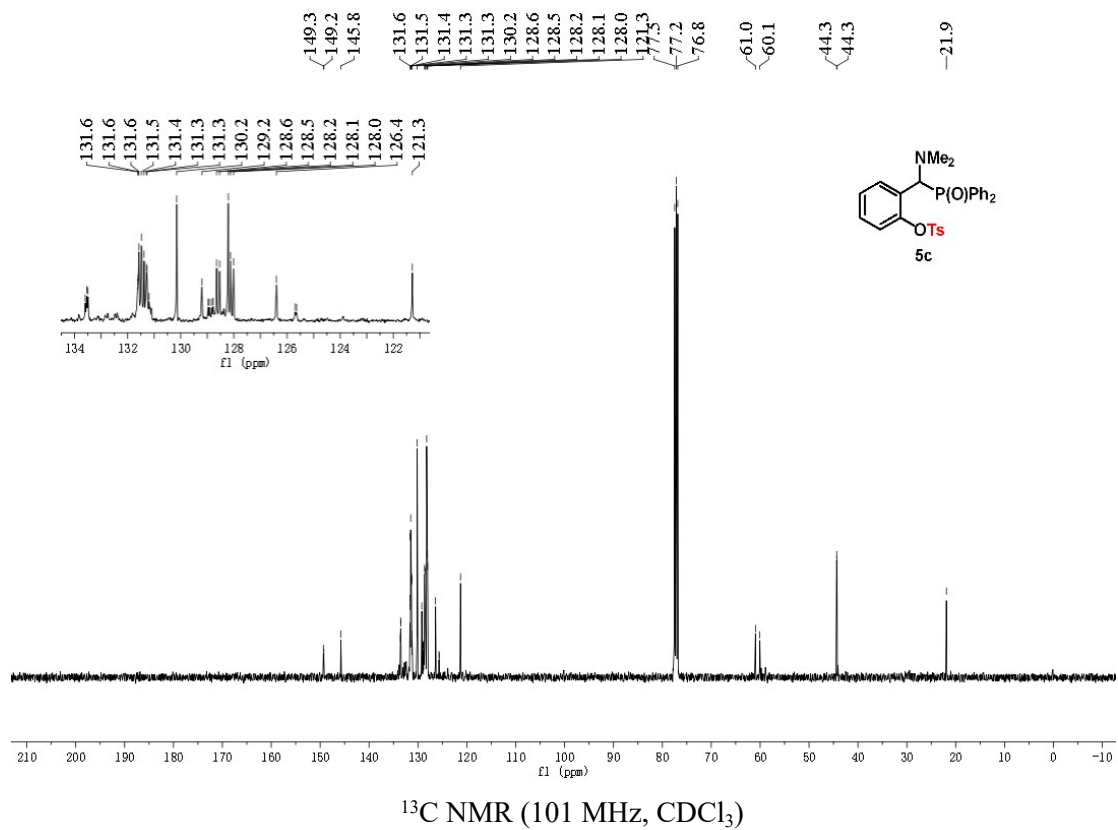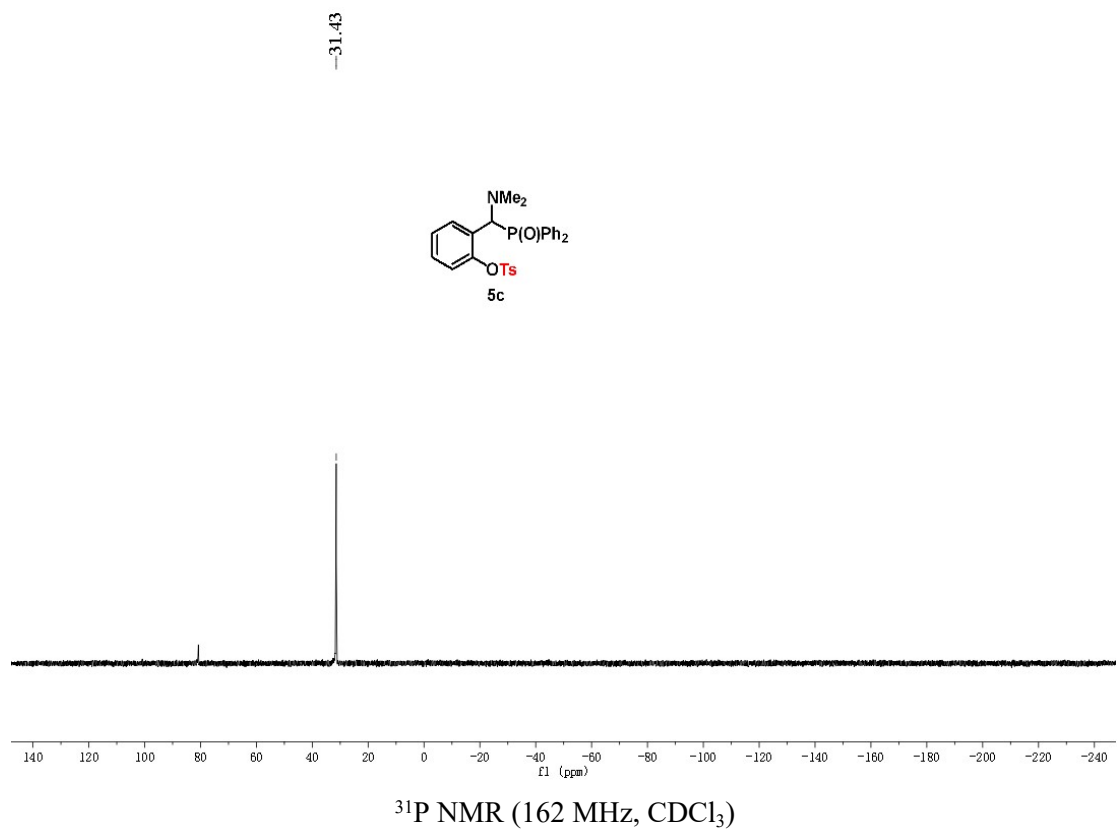

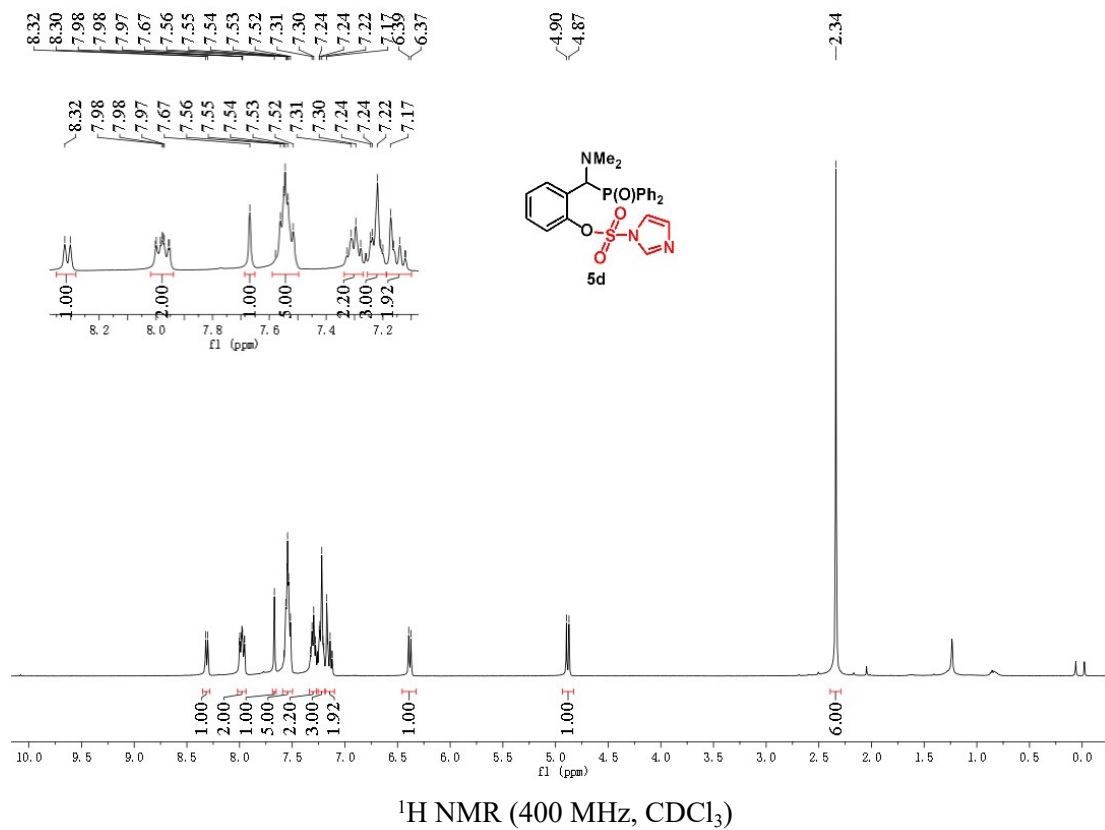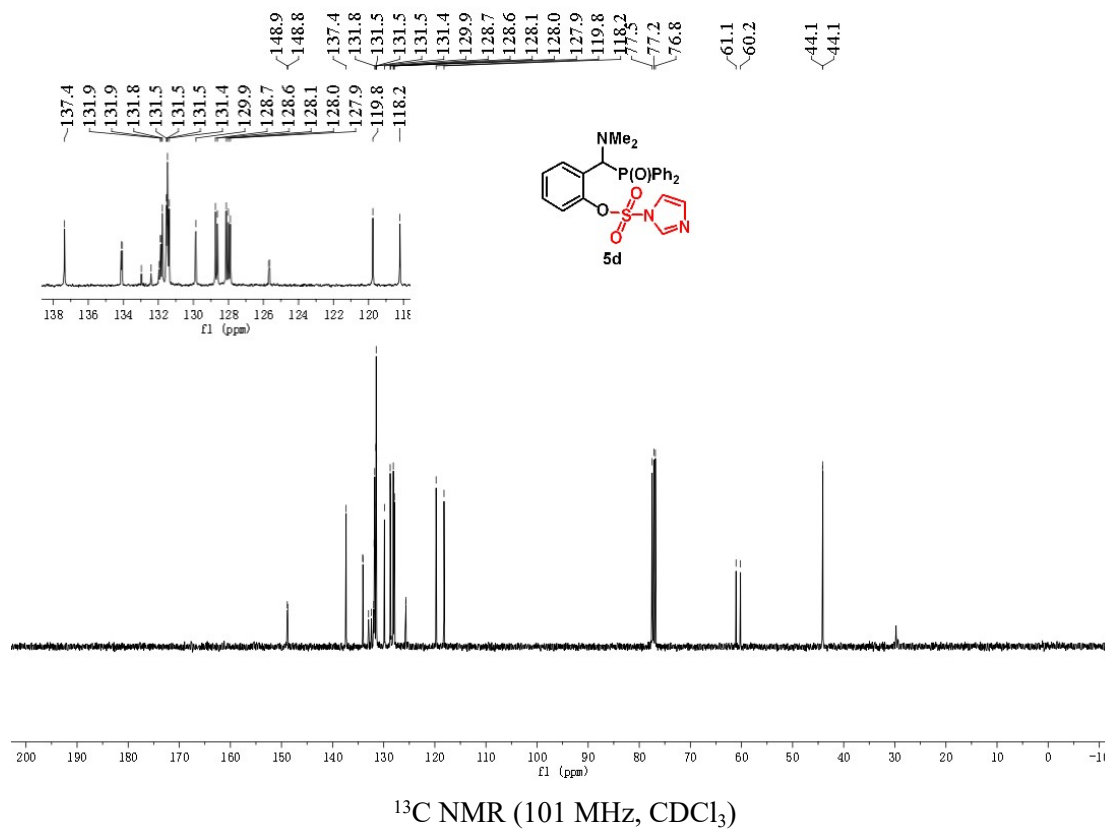

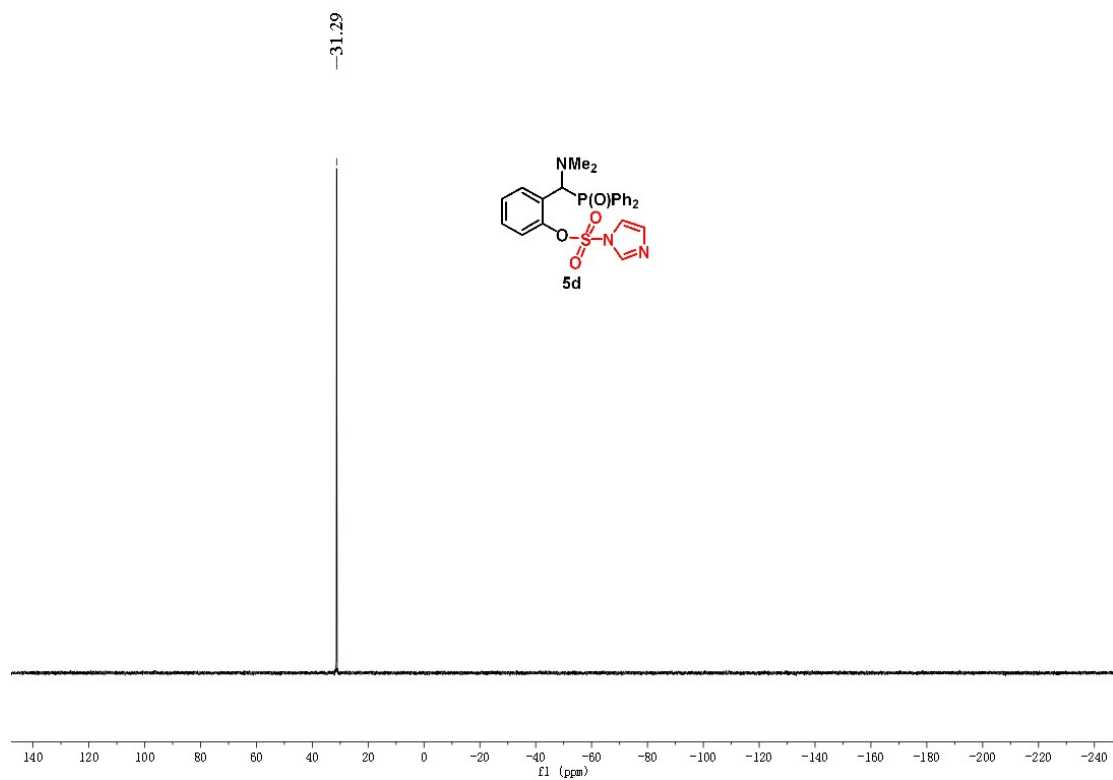

$^{31}\text{P}$  NMR (162 MHz,  $\text{CDCl}_3$ )

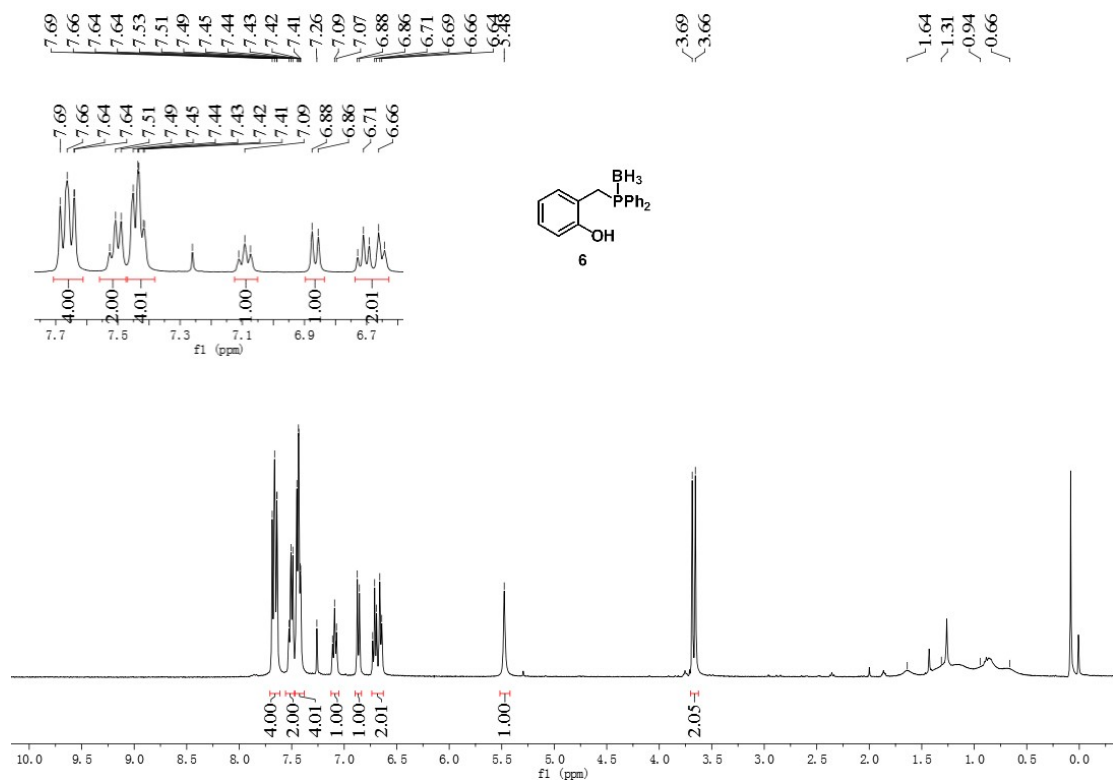

$^1\text{H}$  NMR (400 MHz,  $\text{CDCl}_3$ )

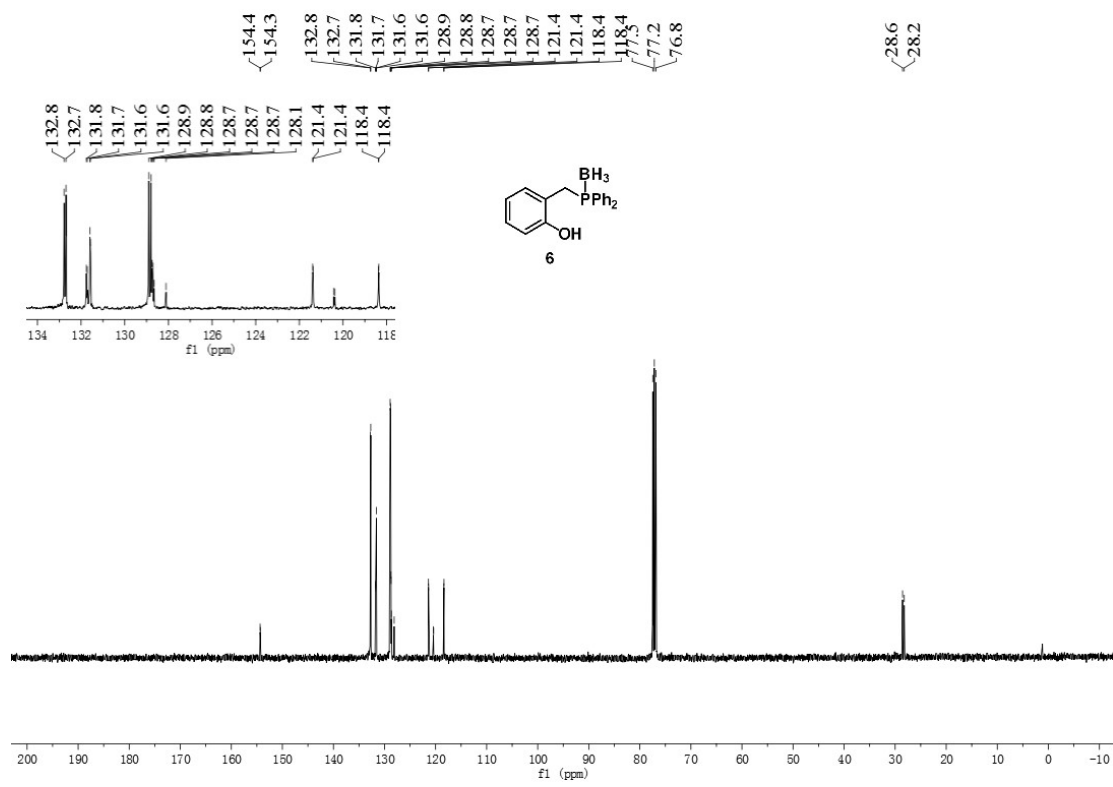

$^{13}\text{C}$  NMR (101 MHz,  $\text{CDCl}_3$ )

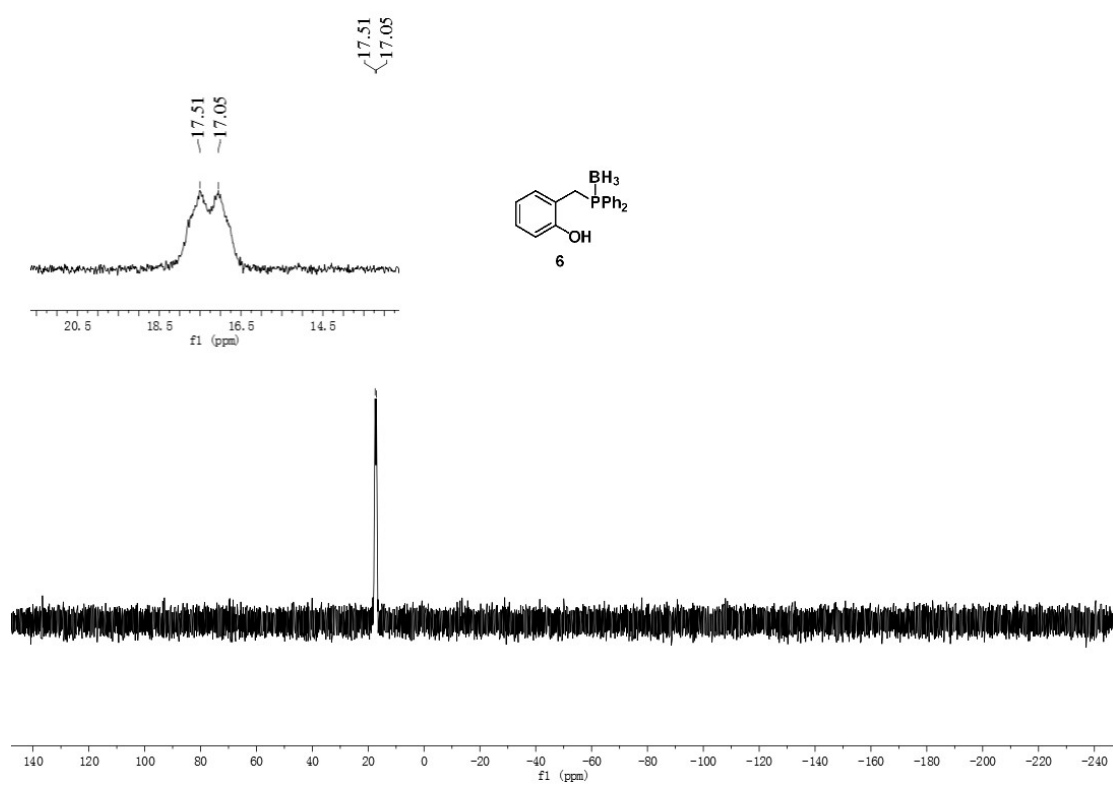

$^{31}\text{P}$  NMR (162 MHz,  $\text{CDCl}_3$ )



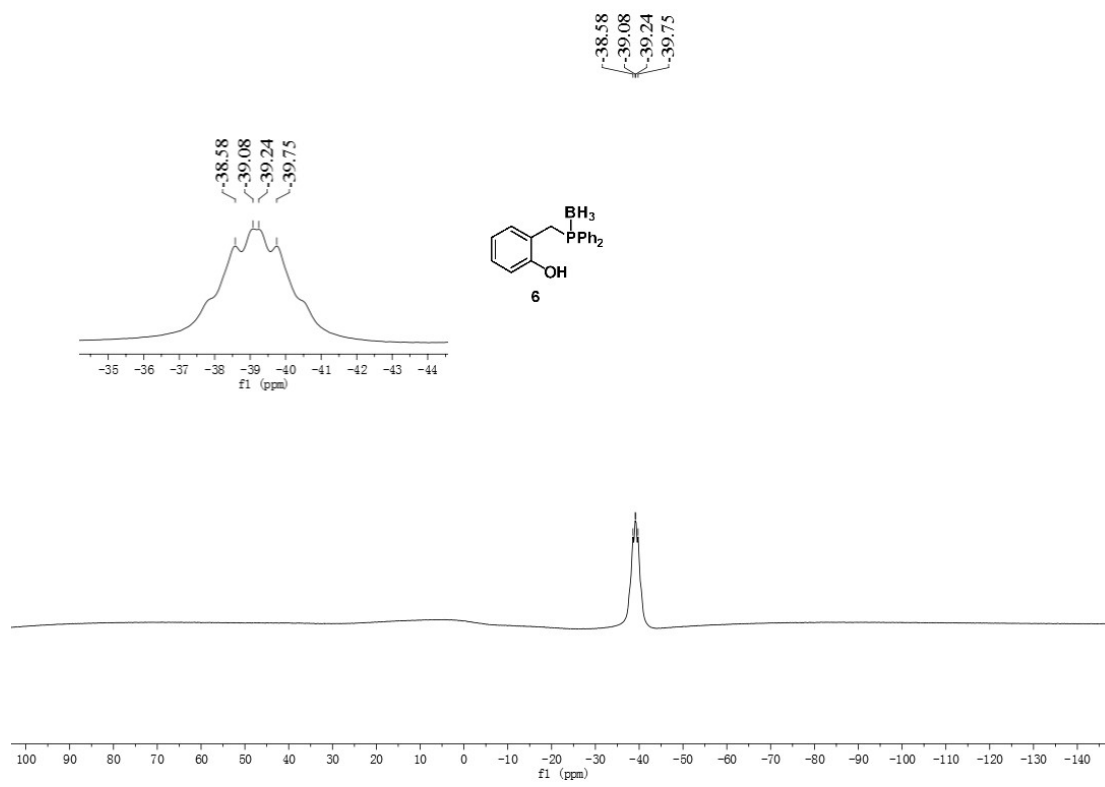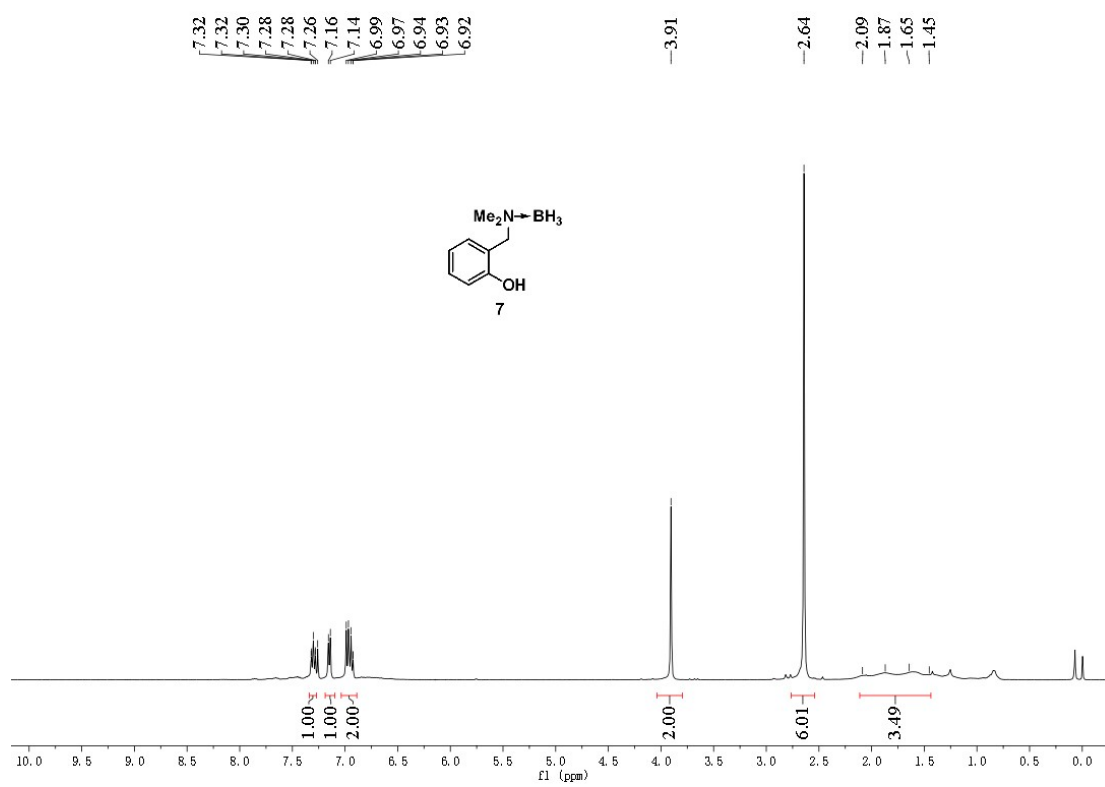

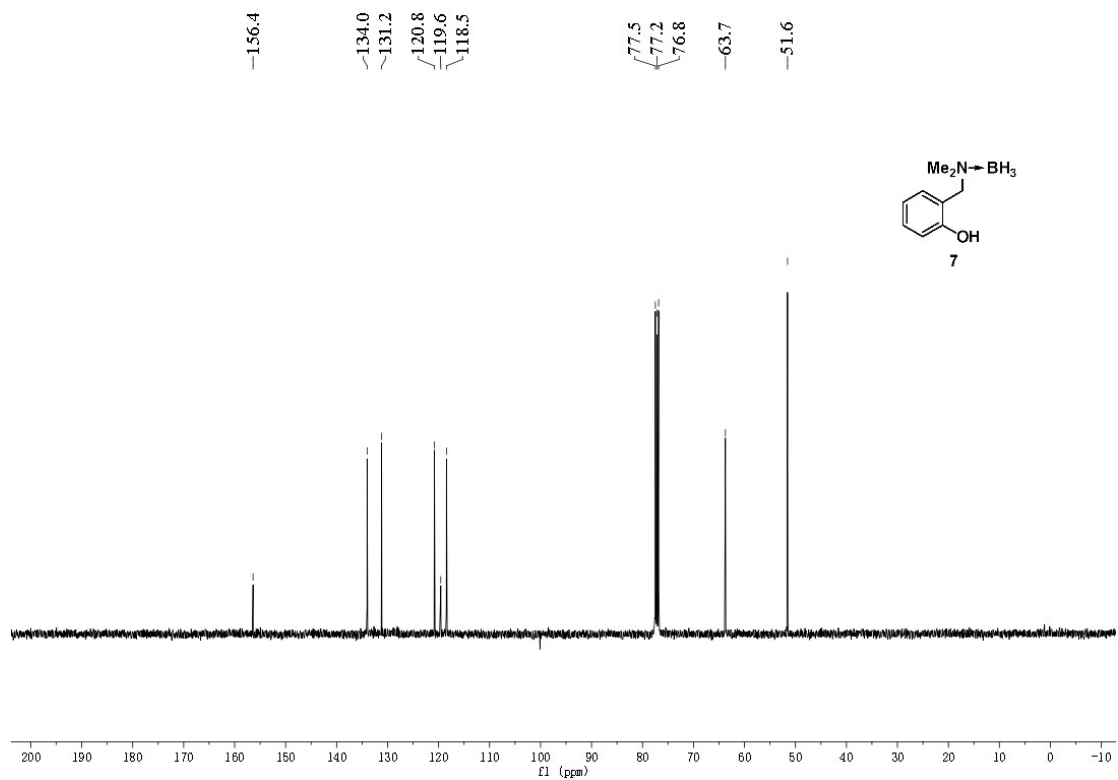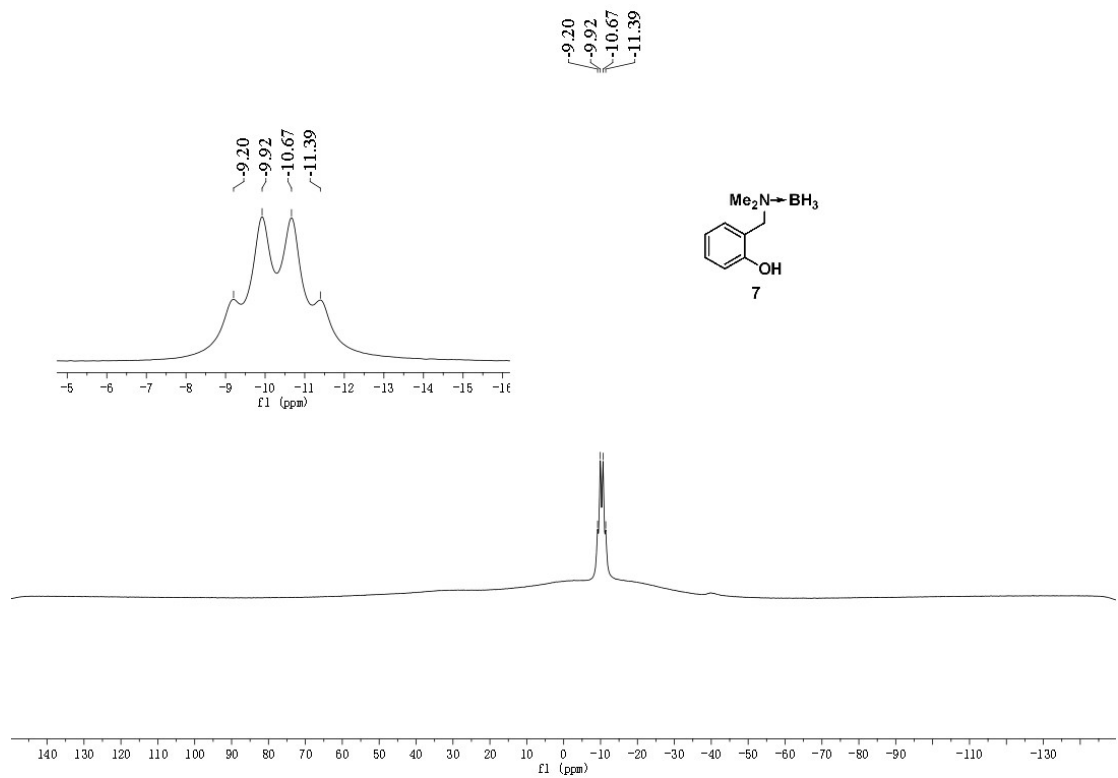

Supplement: d1cc04101k1.pdf [file d1cc04101k1.pdf]
